# Supplementary material
Source: publisher figshare collection journal article supplement (https://springernature.figshare.com/ndownloader/files/14603891)
Supplement: Supplementary file 1 [file 14603891]

## Sheet: Overview
	Additional file 1. Search strategy
	This spreadsheet includes following information:
	0. Details about search string development
	1. Database searches (including search update)
	2. Specialist websites searches
	3. Details of searches in bibliographies of relevant reviews
	4. Details of searches in Google Scholar:
	4a. Google Scholar searches in English
	4b. Google Scholar searches in Danish
	4c. Google Scholar searches in Dutch
	4d. Google Scholar searches in Finnish
	4e. Google Scholar searches in German
	4f. Google Scholar searches in Swedish
	4g. Google Scholar searches in Spanish

## Sheet: Search string development
0. Details of search string development
Date	Comment	Search string	Number of hits	WOS settings	Remark
25-11-2015	Population terms [P]	Bays OR Bioengineer OR “Biogenic habitat” OR Coastal OR Eelgrass OR Estuar* OR Fiord OR “Habitat forming species” OR “Kelp forest” OR Lagoon OR Lake OR Littoral OR Intertidal OR Mudflat OR “Mussel bed*” OR Nearshore OR “Oyster bed*” OR “Rock pool” OR “Sabellaria bed*” OR Shallow OR Saltmarsh OR “Sand bank*” OR Seagrass* OR Seaweed* OR “Shellfish habitat” OR Wetland*	714793	Web of science, all DB, all years, in English
	[P] AND outcome terms [O]	(Abundance OR “Age 0” OR CPUE OR Densit* OR Fish* OR Juvenile* *Larva* OR Nurser* OR “Population change” OR “Fish population change” OR *Recruit* OR “Size class” OR “YOY” OR “Young of year” OR “Young of the year” OR “0 group”) AND (Bays OR Bioengineer OR “Biogenic habitat” OR Coastal OR Eelgrass OR Estuar* OR Fiord OR “Habitat forming species” OR “Kelp forest” OR Lagoon OR Lake OR Littoral OR Int…	159236
	[P] AND [O] AND exposure terms [E]	(Abundance OR “Age 0” OR CPUE OR Densit* OR Fish* OR Juvenile* *Larva* OR Nurser* OR “Population change” OR “Fish population change” OR *Recruit* OR “Size class” OR “YOY” OR “Young of year” OR “Young of the year” OR “0 group”) AND (Bays OR Bioengineer OR “Biogenic habitat” OR Coastal OR Eelgrass OR Estuar* OR Fiord OR “Habitat forming species” OR “Kelp forest” OR Lagoon OR Lake OR Littoral OR Int…	13330
		(Bays OR Coastal OR Estuar* OR Lagoon OR Lake OR Intertidal OR Nearshore OR Shallow OR Seagrass* OR Seaweed* OR Wetland*) AND (“Age 0” OR Fish* OR Juvenile* OR Larva* OR Nurser* OR *Recruit* OR YOY OR “Young of year” OR “Young of the year” OR “0 group”) AND (“Artificial reef” OR “Artificial structure” OR Armoring OR “Beam Trawling” OR Cable OR Construct OR Dock OR Drain OR Dredg* OR “Habitat chan…	7383
03-12-2015	Minor corrections	(Bay* OR Coast* OR Estuar* OR Lagoon* OR Lake* OR Intertid* OR Nears$hore* OR Shallow OR Seagrass* OR Seaweed* OR Wetland*) AND (“artificial reef*” OR “artificial structure*” OR armor* OR “beam trawling” OR cable* OR construct* OR dock* OR drain* OR dredg* OR “habitat change” OR “habitat degradation” OR “habitat loss*” OR “habitat restoration*” OR marina* OR pier* OR pipe* OR port* OR reclamation…	13563	Web of Science Core Collection; Timespan: All years. Indexes: SCI-EXPANDED, SSCI, A&HCI, CPCI-S, CPCI-SSH, BKCI-S, BKCI-SSH, ESCI.
	"Marina" moved to [P]	(Bay* OR Coast* OR Estuar* OR Lagoon* OR Lake* OR Intertid* OR Nears$hore* OR Shallow OR Seagrass* OR Seaweed* OR Wetland* OR marina) AND (“artificial reef*” OR “artificial structure*” OR armor* OR “beam trawling” OR cable* OR construct* OR dock* OR drain* OR dredg* OR “habitat change” OR “habitat degradation” OR “habitat loss*” OR “habitat restoration*” OR pier* OR pipe* OR port* OR reclamation*…	12622
	Changed port* to port$	(Bay* OR Coast* OR Estuar* OR Lagoon* OR Lake* OR Intertid* OR Nears$hore* OR Shallow OR Seagrass* OR Seaweed* OR Wetland* OR marina) AND (“artificial reef*” OR “artificial structure*” OR armor* OR “beam trawling” OR cable* OR construct* OR dock* OR drain* OR dredg* OR “habitat change” OR “habitat degradation” OR “habitat loss*” OR “habitat restoration*” OR pier* OR pipe* OR port$ OR reclamation*…	8966
	Added "anthropogenic pressure*" to [E]	(Bay* OR Coast* OR Estuar* OR Lagoon* OR Lake* OR Intertid* OR Nears$hore* OR Shallow OR Seagrass* OR Seaweed* OR Wetland* OR marina) AND (“artificial reef*” OR “artificial structure*” OR armor* OR “beam trawling” OR cable* OR construct* OR dock* OR drain* OR dredg* OR “habitat change” OR “habitat degradation” OR “habitat loss*” OR “habitat restoration*” OR pier* OR pipe* OR port$ OR reclamation*…	9108
	Added "man$made" to [E]	(Bay* OR Coast* OR Estuar* OR Lagoon* OR Lake* OR Intertid* OR Nears$hore* OR Shallow OR Seagrass* OR Seaweed* OR Wetland* OR marina) AND (“artificial reef*” OR “artificial structure*” OR armor* OR “beam trawling” OR cable* OR construct* OR dock* OR drain* OR dredg* OR “habitat change” OR “habitat degradation” OR “habitat loss*” OR “habitat restoration*” OR pier* OR pipe* OR port$ OR reclamation*…	9417
	Added "Hydrological connectivity" to [E]	(Bay* OR Coast* OR Estuar* OR Lagoon* OR Lake* OR Intertid* OR Nears$hore* OR Shallow OR Seagrass* OR Seaweed* OR Wetland* OR marina) AND (“artificial reef*” OR “artificial structure*” OR armor* OR “beam trawling” OR cable* OR construct* OR dock* OR drain* OR dredg* OR “habitat change” OR “habitat degradation” OR “habitat loss*” OR “habitat restoration*” OR pier* OR pipe* OR port$ OR reclamation*…	9459
	Added "floodplain" to [E]	(Bay* OR Coast* OR Estuar* OR Lagoon* OR Lake* OR Intertid* OR Nears$hore* OR Shallow OR Seagrass* OR Seaweed* OR Wetland* OR marina) AND (“artificial reef*” OR “artificial structure*” OR armor* OR “beam trawling” OR cable* OR construct* OR dock* OR drain* OR dredg* OR “habitat change” OR “habitat degradation” OR “habitat loss*” OR “habitat restoration*” OR pier* OR pipe* OR port$ OR reclamation*…	10426
	"floodplain" moved to [P]	(Bay* OR Coast* OR Estuar* OR Lagoon* OR Lake* OR Intertid* OR Nears$hore* OR Shallow OR Seagrass* OR Seaweed* OR Wetland* OR marina or "floodplain") AND (“artificial reef*” OR “artificial structure*” OR armor* OR “beam trawling” OR cable* OR construct* OR dock* OR drain* OR dredg* OR “habitat change” OR “habitat degradation” OR “habitat loss*” OR “habitat restoration*” OR pier* OR pipe* OR port$…	9641
04/12/2015	Same as above but searched in Web of Science (all collections)	((Bay* OR Coast* OR Estuar* OR Lagoon* OR Lake* OR Intertid* OR Nears$hore* OR Shallow OR Seagrass* OR Seaweed* OR Wetland* OR marina or "floodplain") AND (“artificial reef*” OR “artificial structure*” OR armor* OR “beam trawling” OR cable* OR construct* OR dock* OR drain* OR dredg* OR “habitat change” OR “habitat degradation” OR “habitat loss*” OR “habitat restoration*” OR pier* OR pipe* OR port…	11603	(from All Databases, Timespan: All years. Search language=English
	Added "CPUE" to [O]	((Bay* OR Coast* OR Estuar* OR Lagoon* OR Lake* OR Intertid* OR Nears$hore* OR Shallow OR Seagrass* OR Seaweed* OR Wetland* OR marina or "floodplain") AND (“artificial reef*” OR “artificial structure*” OR armor* OR “beam trawling” OR cable* OR construct* OR dock* OR drain* OR dredg* OR “habitat change” OR “habitat degradation” OR “habitat loss*” OR “habitat restoration*” OR pier* OR pipe* OR port…	11608
	Added "fish population change" to [O]	((Bay* OR Coast* OR Estuar* OR Lagoon* OR Lake* OR Intertid* OR Nears$hore* OR Shallow OR Seagrass* OR Seaweed* OR Wetland* OR marina or "floodplain") AND (“artificial reef*” OR “artificial structure*” OR armor* OR “beam trawling” OR cable* OR construct* OR dock* OR drain* OR dredg* OR “habitat change” OR “habitat degradation” OR “habitat loss*” OR “habitat restoration*” OR pier* OR pipe* OR port…	11608		no change, removed
	Added "size class" to [O]	((Bay* OR Coast* OR Estuar* OR Lagoon* OR Lake* OR Intertid* OR Nears$hore* OR Shallow OR Seagrass* OR Seaweed* OR Wetland* OR marina or "floodplain") AND (“artificial reef*” OR “artificial structure*” OR armor* OR “beam trawling” OR cable* OR construct* OR dock* OR drain* OR dredg* OR “habitat change” OR “habitat degradation” OR “habitat loss*” OR “habitat restoration*” OR pier* OR pipe* OR port…	11640		many non-fish species, removed
	Added "seawall" to [E]	((Bay* OR Coast* OR Estuar* OR Lagoon* OR Lake* OR Intertid* OR Nears$hore* OR Shallow OR Seagrass* OR Seaweed* OR Wetland* OR marina or "floodplain") AND (“artificial reef*” OR “artificial structure*” OR armor* OR “beam trawling” OR cable* OR construct* OR dock* OR drain* OR dredg* OR “habitat change” OR “habitat degradation” OR “habitat loss*” OR “habitat restoration*” OR pier* OR pipe* OR port…	11630
	Added "0+fish" to [O]	((Bay* OR Coast* OR Estuar* OR Lagoon* OR Lake* OR Intertid* OR Nears$hore* OR Shallow OR Seagrass* OR Seaweed* OR Wetland* OR marina or "floodplain") AND (“artificial reef*” OR “artificial structure*” OR armor* OR “beam trawling” OR cable* OR construct* OR dock* OR drain* OR dredg* OR “habitat change” OR “habitat degradation” OR “habitat loss*” OR “habitat restoration*” OR pier* OR pipe* OR port…	11630		captures 17 articles, retained
07/12/2015	Same as above	((Bay* OR Coast* OR Estuar* OR Lagoon* OR Lake* OR Intertid* OR Nears$hore* OR Shallow OR Seagrass* OR Seaweed* OR Wetland* OR marina or "floodplain") AND (“artificial reef*” OR “artificial structure*” OR armor* OR “beam trawling” OR cable* OR construct* OR dock* OR drain* OR dredg* OR “habitat change” OR “habitat degradation” OR “habitat loss*” OR “habitat restoration*” OR pier* OR pipe* OR port…	11643	(from All Databases) Timespan: All years. Search language=English
	Added "littoral", "fiord" to [P]	(Bay* OR Coast* OR Estuar* OR Lagoon* OR Lake* OR Intertid* OR Nears$hore* OR Shallow OR Seagrass* OR Seaweed* OR Wetland* OR marina OR "floodplain" OR "fiord*" OR "litoral") AND (“artificial reef*” OR “artificial structure*” OR armor* OR “beam trawling” OR cable* OR construct* OR dock* OR drain* OR dredg* OR “habitat change” OR “habitat degradation” OR “habitat loss*” OR “habitat restoration*” O…	11647
	Added "mudflat"	(Bay* OR Coast* OR Estuar* OR Lagoon* OR Lake* OR Intertid* OR Nears$hore* OR Shallow OR Seagrass* OR Seaweed* OR Wetland* OR marina OR "floodplain" OR "fiord*" OR "litoral" OR "mudflat*") AND (“artificial reef*” OR “artificial structure*” OR armor* OR “beam trawling” OR cable* OR construct* OR dock* OR drain* OR dredg* OR “habitat change” OR “habitat degradation” OR “habitat loss*” OR “habitat r…	11652
	Deleted "construct*" as it is too general	(Bay* OR Coast* OR Estuar* OR Lagoon* OR Lake* OR Intertid* OR Nears$hore* OR Shallow OR Seagrass* OR Seaweed* OR Wetland* OR marina OR "floodplain" OR "fiord*" OR "litoral" OR "mudflat*") AND (“artificial reef*” OR “artificial structure*” OR armor* OR “beam trawling” OR cable* OR dock* OR drain* OR dredg* OR “habitat change” OR “habitat degradation” OR “habitat loss*” OR “habitat restoration*” O…	8418
	Added "*" to the "floodplain"	(Bay* OR Coast* OR Estuar* OR Lagoon* OR Lake* OR Intertid* OR Nears$hore* OR Shallow OR Seagrass* OR Seaweed* OR Wetland* OR marina OR "floodplain*" OR "fiord*" OR "litoral" OR "mudflat*") AND (“artificial reef*” OR “artificial structure*” OR armor* OR “beam trawling” OR cable* OR dock* OR drain* OR dredg* OR “habitat change” OR “habitat degradation” OR “habitat loss*” OR “habitat restoration*” …	8,447
	Added "$" to armor* to capture alternative spelling	(Bay* OR Coast* OR Estuar* OR Lagoon* OR Lake* OR Intertid* OR Nears$hore* OR Shallow OR Seagrass* OR Seaweed* OR Wetland* OR marina OR "floodplain*" OR "fiord*" OR "litoral" OR "mudflat*") AND (“artificial reef*” OR “artificial structure*” OR armo$r* OR “beam trawling” OR cable* OR dock* OR drain* OR dredg* OR “habitat change” OR “habitat degradation” OR “habitat loss*” OR “habitat restoration*”…	8,493
	Added "salt$marsh" to [P]	(Bay* OR Coast* OR Estuar* OR Lagoon* OR Lake* OR Intertid* OR Nears$hore* OR Shallow OR Seagrass* OR Seaweed* OR Wetland* OR marina OR "floodplain*" OR "fiord*" OR "litoral" OR "mudflat*" OR saltmarsh*) AND (“artificial reef*” OR “artificial structure*” OR armo$r* OR “beam trawling” OR cable* OR dock* OR drain* OR dredg* OR “habitat change” OR “habitat degradation” OR “habitat loss*” OR “habitat…	8,494
	Added "eelgrass" to [P]	(Bay* OR Coast* OR Estuar* OR Lagoon* OR Lake* OR Intertid* OR Nears$hore* OR Shallow OR Seagrass* OR Seaweed* OR Wetland* OR marina OR "floodplain*" OR "fiord*" OR "litoral" OR "mudflat*" OR saltmarsh* OR eelgrass*) AND (“artificial reef*” OR “artificial structure*” OR armo$r* OR “beam trawling” OR cable* OR dock* OR drain* OR dredg* OR “habitat change” OR “habitat degradation” OR “habitat loss*…	8,499
	Added "Biogenic habitat", “Habitat forming species", "Kelp forest", "Mussel bed*", "Oyster bed*","Rock pool","Sabellaria bed*", "Sand bank*, "Shellfish habitat" to [P]	(Bay* OR Coast* OR Estuar* OR Lagoon* OR Lake* OR Intertid* OR Nears$hore* OR Shallow OR Seagrass* OR Seaweed* OR Wetland* OR marina OR "floodplain*" OR "fiord*" OR "litoral" OR "mudflat*" OR saltmarsh* OR eelgrass* OR “Biogenic habitat” OR “Habitat forming species” OR “Kelp forest” OR “Mussel bed*” OR “Oyster bed*” OR “Rock pool” OR “Sabellaria bed*” OR “Sand bank*” OR “Shellfish habitat”) AND (…	8,527
2015-12-08	Added "coastal defence" to [E]	(Bay* OR Coast* OR Estuar* OR Lagoon* OR Lake* OR Intertid* OR Nears$hore* OR Shallow OR Seagrass* OR Seaweed* OR Wetland* OR marina OR "floodplain*" OR "fiord*" OR "litoral" OR "mudflat*" OR saltmarsh* OR eelgrass* OR “Biogenic habitat” OR “Habitat forming species” OR “Kelp forest” OR “Mussel bed*” OR “Oyster bed*” OR “Rock pool” OR “Sabellaria bed*” OR “Sand bank*” OR “Shellfish habitat”) AND (…	8,553	(from All Databases) Timespan: All years. Search language=English
	Added "breakwater" to [E]	(Bay* OR Coast* OR Estuar* OR Lagoon* OR Lake* OR Intertid* OR Nears$hore* OR Shallow OR Seagrass* OR Seaweed* OR Wetland* OR marina OR "floodplain*" OR "fiord*" OR "litoral" OR "mudflat*" OR saltmarsh* OR eelgrass* OR “Biogenic habitat” OR “Habitat forming species” OR “Kelp forest” OR “Mussel bed*” OR “Oyster bed*” OR “Rock pool” OR “Sabellaria bed*” OR “Sand bank*” OR “Shellfish habitat”) AND (…	8,597
	Added "Buoy" to [E]	(Bay* OR Coast* OR Estuar* OR Lagoon* OR Lake* OR Intertid* OR Nears$hore* OR Shallow OR Seagrass* OR Seaweed* OR Wetland* OR marina OR "floodplain*" OR "fiord*" OR "litoral" OR "mudflat*" OR saltmarsh* OR eelgrass* OR “Biogenic habitat” OR “Habitat forming species” OR “Kelp forest” OR “Mussel bed*” OR “Oyster bed*” OR “Rock pool” OR “Sabellaria bed*” OR “Sand bank*” OR “Shellfish habitat”) AND (…	9116
	Delted "litoral" as it was too broad	(Bay* OR Coast* OR Estuar* OR Lagoon* OR Lake* OR Intertid* OR Nears$hore* OR Shallow OR Seagrass* OR Seaweed* OR Wetland* OR marina OR "floodplain*" OR "fiord*" OR "mudflat*" OR saltmarsh* OR eelgrass* OR “Biogenic habitat” OR “Habitat forming species” OR “Kelp forest” OR “Mussel bed*” OR “Oyster bed*” OR “Rock pool” OR “Sabellaria bed*” OR “Sand bank*” OR “Shellfish habitat”) AND (“artificial r…	9,113
	Deleted "" where redundant	(Bay* OR Coast* OR Estuar* OR Lagoon* OR Lake* OR Intertid* OR Nears$hore* OR Shallow OR Seagrass* OR Seaweed* OR Wetland* OR marina OR floodplain* OR fiord* OR mudflat* OR saltmarsh* OR eelgrass* OR “Biogenic habitat” OR “Habitat forming species” OR “Kelp forest” OR “Mussel bed*” OR “Oyster bed*” OR “Rock pool” OR “Sabellaria bed*” OR “Sand bank*” OR “Shellfish habitat”) AND (“artificial reef*” …	9113
	Added "gabions" to [E]	(Bay* OR Coast* OR Estuar* OR Lagoon* OR Lake* OR Intertid* OR Nears$hore* OR Shallow OR Seagrass* OR Seaweed* OR Wetland* OR marina OR floodplain* OR fiord* OR mudflat* OR saltmarsh* OR eelgrass* OR “Biogenic habitat” OR “Habitat forming species” OR “Kelp forest” OR “Mussel bed*” OR “Oyster bed*” OR “Rock pool” OR “Sabellaria bed*” OR “Sand bank*” OR “Shellfish habitat”) AND (“artificial reef*” …	9116
	Added "groyne" to [E]	(Bay* OR Coast* OR Estuar* OR Lagoon* OR Lake* OR Intertid* OR Nears$hore* OR Shallow OR Seagrass* OR Seaweed* OR Wetland* OR marina OR floodplain* OR fiord* OR mudflat* OR saltmarsh* OR eelgrass* OR “Biogenic habitat” OR “Habitat forming species” OR “Kelp forest” OR “Mussel bed*” OR “Oyster bed*” OR “Rock pool” OR “Sabellaria bed*” OR “Sand bank*” OR “Shellfish habitat”) AND (“artificial reef*” …	9122
	Added "jetti" to [E]	(Bay* OR Coast* OR Estuar* OR Lagoon* OR Lake* OR Intertid* OR Nears$hore* OR Shallow OR Seagrass* OR Seaweed* OR Wetland* OR marina OR floodplain* OR fiord* OR mudflat* OR saltmarsh* OR eelgrass* OR “Biogenic habitat” OR “Habitat forming species” OR “Kelp forest” OR “Mussel bed*” OR “Oyster bed*” OR “Rock pool” OR “Sabellaria bed*” OR “Sand bank*” OR “Shellfish habitat”) AND (“artificial reef*” …	9146
	Added “aggregate extraction” to [E]	(Bay* OR Coast* OR Estuar* OR Lagoon* OR Lake* OR Intertid* OR Nears$hore* OR Shallow OR Seagrass* OR Seaweed* OR Wetland* OR marina OR floodplain* OR fiord* OR mudflat* OR saltmarsh* OR eelgrass* OR “Biogenic habitat” OR “Habitat forming species” OR “Kelp forest” OR “Mussel bed*” OR “Oyster bed*” OR “Rock pool” OR “Sabellaria bed*” OR “Sand bank*” OR “Shellfish habitat”) AND (“artificial reef*” …	9150
	Added "revetment" to [E]	(Bay* OR Coast* OR Estuar* OR Lagoon* OR Lake* OR Intertid* OR Nears$hore* OR Shallow OR Seagrass* OR Seaweed* OR Wetland* OR marina OR floodplain* OR fiord* OR mudflat* OR saltmarsh* OR eelgrass* OR “Biogenic habitat” OR “Habitat forming species” OR “Kelp forest” OR “Mussel bed*” OR “Oyster bed*” OR “Rock pool” OR “Sabellaria bed*” OR “Sand bank*” OR “Shellfish habitat”) AND (“artificial reef*” …	9163
	Added “hard engineering” to [E]	(Bay* OR Coast* OR Estuar* OR Lagoon* OR Lake* OR Intertid* OR Nears$hore* OR Shallow OR Seagrass* OR Seaweed* OR Wetland* OR marina OR floodplain* OR fiord* OR mudflat* OR saltmarsh* OR eelgrass* OR “Biogenic habitat” OR “Habitat forming species” OR “Kelp forest” OR “Mussel bed*” OR “Oyster bed*” OR “Rock pool” OR “Sabellaria bed*” OR “Sand bank*” OR “Shellfish habitat”) AND (“artificial reef*” …	9164
	Added "mooring" to [E]	(Bay* OR Coast* OR Estuar* OR Lagoon* OR Lake* OR Intertid* OR Nears$hore* OR Shallow OR Seagrass* OR Seaweed* OR Wetland* OR marina OR floodplain* OR fiord* OR mudflat* OR saltmarsh* OR eelgrass* OR “Biogenic habitat” OR “Habitat forming species” OR “Kelp forest” OR “Mussel bed*” OR “Oyster bed*” OR “Rock pool” OR “Sabellaria bed*” OR “Sand bank*” OR “Shellfish habitat”) AND (“artificial reef*” …	9,251
	Added "drill" to [E]	(Bay* OR Coast* OR Estuar* OR Lagoon* OR Lake* OR Intertid* OR Nears$hore* OR Shallow OR Seagrass* OR Seaweed* OR Wetland* OR marina OR floodplain* OR fiord* OR mudflat* OR saltmarsh* OR eelgrass* OR “Biogenic habitat” OR “Habitat forming species” OR “Kelp forest” OR “Mussel bed*” OR “Oyster bed*” OR “Rock pool” OR “Sabellaria bed*” OR “Sand bank*” OR “Shellfish habitat”) AND (“artificial reef*” …	9406
	Added "shore" to [P]	(Shore* OR Bay* OR Coast* OR Estuar* OR Lagoon* OR Lake* OR Intertid* OR Nears$hore* OR Shallow OR Seagrass* OR Seaweed* OR Wetland* OR marina OR floodplain* OR fiord* OR mudflat* OR saltmarsh* OR eelgrass* OR “Biogenic habitat” OR “Habitat forming species” OR “Kelp forest” OR “Mussel bed*” OR “Oyster bed*” OR “Rock pool” OR “Sabellaria bed*” OR “Sand bank*” OR “Shellfish habitat”) AND (“artifici…	9566
	Added “flood gate” to [E]	(Shore* OR Bay* OR Coast* OR Estuar* OR Lagoon* OR Lake* OR Intertid* OR Nears$hore* OR Shallow OR Seagrass* OR Seaweed* OR Wetland* OR marina OR floodplain* OR fiord* OR mudflat* OR saltmarsh* OR eelgrass* OR “Biogenic habitat” OR “Habitat forming species” OR “Kelp forest” OR “Mussel bed*” OR “Oyster bed*” OR “Rock pool” OR “Sabellaria bed*” OR “Sand bank*” OR “Shellfish habitat”) AND (“artifici…	9574
	Added "OR protection OR management OR nourishment" to [E]	(Shore* OR Bay* OR Coast* OR Estuar* OR Lagoon* OR Lake* OR Intertid* OR Nears$hore* OR Shallow OR Seagrass* OR Seaweed* OR Wetland* OR marina OR floodplain* OR fiord* OR mudflat* OR saltmarsh* OR eelgrass* OR “Biogenic habitat” OR “Habitat forming species” OR “Kelp forest” OR “Mussel bed*” OR “Oyster bed*” OR “Rock pool” OR “Sabellaria bed*” OR “Sand bank*” OR “Shellfish habitat”) AND (“artifici…	too much >27000…
	Added "sea dike" to [E]	(Shore* OR Bay* OR Coast* OR Estuar* OR Lagoon* OR Lake* OR Intertid* OR Nears$hore* OR Shallow OR Seagrass* OR Seaweed* OR Wetland* OR marina OR floodplain* OR fiord* OR mudflat* OR saltmarsh* OR eelgrass* OR “Biogenic habitat” OR “Habitat forming species” OR “Kelp forest” OR “Mussel bed*” OR “Oyster bed*” OR “Rock pool” OR “Sabellaria bed*” OR “Sand bank*” OR “Shellfish habitat”) AND (“artifici…	9702
	Added "ship channel" to [E]	(Shore* OR Bay* OR Coast* OR Estuar* OR Lagoon* OR Lake* OR Intertid* OR Nears$hore* OR Shallow OR Seagrass* OR Seaweed* OR Wetland* OR marina OR floodplain* OR fiord* OR mudflat* OR saltmarsh* OR eelgrass* OR “Biogenic habitat” OR “Habitat forming species” OR “Kelp forest” OR “Mussel bed*” OR “Oyster bed*” OR “Rock pool” OR “Sabellaria bed*” OR “Sand bank*” OR “Shellfish habitat”) AND (“artifici…	9715
	Added "Ship fairway" to [E]	(Shore* OR Bay* OR Coast* OR Estuar* OR Lagoon* OR Lake* OR Intertid* OR Nears$hore* OR Shallow OR Seagrass* OR Seaweed* OR Wetland* OR marina OR floodplain* OR fiord* OR mudflat* OR saltmarsh* OR eelgrass* OR “Biogenic habitat” OR “Habitat forming species” OR “Kelp forest” OR “Mussel bed*” OR “Oyster bed*” OR “Rock pool” OR “Sabellaria bed*” OR “Sand bank*” OR “Shellfish habitat”) AND (“artifici…	9715
	Deleted "fairway", added "shipping lane" to [E]	(Shore* OR Bay* OR Coast* OR Estuar* OR Lagoon* OR Lake* OR Intertid* OR Nears$hore* OR Shallow OR Seagrass* OR Seaweed* OR Wetland* OR marina OR floodplain* OR fiord* OR mudflat* OR saltmarsh* OR eelgrass* OR “Biogenic habitat” OR “Habitat forming species” OR “Kelp forest” OR “Mussel bed*” OR “Oyster bed*” OR “Rock pool” OR “Sabellaria bed*” OR “Sand bank*” OR “Shellfish habitat”) AND (“artifici…	9726
	Added "tidal energy" to [E]	(Shore* OR Bay* OR Coast* OR Estuar* OR Lagoon* OR Lake* OR Intertid* OR Nears$hore* OR Shallow OR Seagrass* OR Seaweed* OR Wetland* OR marina OR floodplain* OR fiord* OR mudflat* OR saltmarsh* OR eelgrass* OR “Biogenic habitat” OR “Habitat forming species” OR “Kelp forest” OR “Mussel bed*” OR “Oyster bed*” OR “Rock pool” OR “Sabellaria bed*” OR “Sand bank*” OR “Shellfish habitat”) AND (“artifici…	9748
	Added "wave energy" to [E]	(Shore* OR Bay* OR Coast* OR Estuar* OR Lagoon* OR Lake* OR Intertid* OR Nears$hore* OR Shallow OR Seagrass* OR Seaweed* OR Wetland* OR marina OR floodplain* OR fiord* OR mudflat* OR saltmarsh* OR eelgrass* OR “Biogenic habitat” OR “Habitat forming species” OR “Kelp forest” OR “Mussel bed*” OR “Oyster bed*” OR “Rock pool” OR “Sabellaria bed*” OR “Sand bank*” OR “Shellfish habitat”) AND (“artifici…	9863
	Added "wetland disconnection", "wetland reconnection" to [E]	(Shore* OR Bay* OR Coast* OR Estuar* OR Lagoon* OR Lake* OR Intertid* OR Nears$hore* OR Shallow OR Seagrass* OR Seaweed* OR Wetland* OR marina OR floodplain* OR fiord* OR mudflat* OR saltmarsh* OR eelgrass* OR “Biogenic habitat” OR “Habitat forming species” OR “Kelp forest” OR “Mussel bed*” OR “Oyster bed*” OR “Rock pool” OR “Sabellaria bed*” OR “Sand bank*” OR “Shellfish habitat”) AND (“artifici…	9863
	Deleted "wetland re/disconnection", added "habitat complexity", "habitat enhancement" to [E]	(Shore* OR Bay* OR Coast* OR Estuar* OR Lagoon* OR Lake* OR Intertid* OR Nears$hore* OR Shallow OR Seagrass* OR Seaweed* OR Wetland* OR marina OR floodplain* OR fiord* OR mudflat* OR saltmarsh* OR eelgrass* OR “Biogenic habitat” OR “Habitat forming species” OR “Kelp forest” OR “Mussel bed*” OR “Oyster bed*” OR “Rock pool” OR “Sabellaria bed*” OR “Sand bank*” OR “Shellfish habitat”) AND (“artifici…	10396
	Only [E] AND [O]	(“artificial reef*” OR “artificial structure*” OR armo$r* OR “beam trawling” OR cable* OR dock* OR drain* OR dredg* OR “habitat change” OR “habitat degradation” OR “habitat loss*” OR “habitat restoration*” OR pier* OR pipe* OR port$ OR reclamation* OR “wind farm” OR “wind turbines” OR "ship wreck*" OR "anthropogenic pressure*" OR "man$made" OR "hydrological connectivit*" OR seawall* OR "coastal d…	35917
	Only [E] AND [P]	(“artificial reef*” OR “artificial structure*” OR armo$r* OR “beam trawling” OR cable* OR dock* OR drain* OR dredg* OR “habitat change” OR “habitat degradation” OR “habitat loss*” OR “habitat restoration*” OR pier* OR pipe* OR port$ OR reclamation* OR “wind farm” OR “wind turbines” OR "ship wreck*" OR "anthropogenic pressure*" OR "man$made" OR "hydrological connectivit*" OR seawall* OR "coastal d…	74,994
	Only [P] AND [O]	(Shore* OR Bay* OR Coast* OR Estuar* OR Lagoon* OR Lake* OR Intertid* OR Nears$hore* OR Shallow OR Seagrass* OR Seaweed* OR Wetland* OR marina OR floodplain* OR fiord* OR mudflat* OR saltmarsh* OR eelgrass* OR “Biogenic habitat” OR “Habitat forming species” OR “Kelp forest” OR “Mussel bed*” OR “Oyster bed*” OR “Rock pool” OR “Sabellaria bed*” OR “Sand bank*” OR “Shellfish habitat”) AND (“age$0” O…	129,280
	"pipe*" changed to "pipe$", addedd "*" to "groyne"	(Shore* OR Bay* OR Coast* OR Estuar* OR Lagoon* OR Lake* OR Intertid* OR Nears$hore* OR Shallow OR Seagrass* OR Seaweed* OR Wetland* OR marina OR floodplain* OR fiord* OR mudflat* OR saltmarsh* OR eelgrass* OR “Biogenic habitat” OR “Habitat forming species” OR “Kelp forest” OR “Mussel bed*” OR “Oyster bed*” OR “Rock pool” OR “Sabellaria bed*” OR “Sand bank*” OR “Shellfish habitat”) AND (“artifici…	10277
	Added "fish" to some outcome terms (nursery, recruitment, etc.)	(Shore* OR Bay* OR Coast* OR Estuar* OR Lagoon* OR Lake* OR Intertid* OR Nears$hore* OR Shallow OR Seagrass* OR Seaweed* OR Wetland* OR marina OR floodplain* OR fiord* OR mudflat* OR saltmarsh* OR eelgrass* OR “Biogenic habitat” OR “Habitat forming species” OR “Kelp forest” OR “Mussel bed*” OR “Oyster bed*” OR “Rock pool” OR “Sabellaria bed*” OR “Sand bank*” OR “Shellfish habitat”) AND (“artifici…	8360
	Added "abundance" and "density" to [O]	(Shore* OR Bay* OR Coast* OR Estuar* OR Lagoon* OR Lake* OR Intertid* OR Nears$hore* OR Shallow OR Seagrass* OR Seaweed* OR Wetland* OR marina OR floodplain* OR fiord* OR mudflat* OR saltmarsh* OR eelgrass* OR “Biogenic habitat” OR “Habitat forming species” OR “Kelp forest” OR “Mussel bed*” OR “Oyster bed*” OR “Rock pool” OR “Sabellaria bed*” OR “Sand bank*” OR “Shellfish habitat”) AND (“artifici…	8360
10/12/2015	Additional changes based on expert inputs. Added "litoral", "marina*", "microphyte", "marsh" to [P], deleted rock pool in [P]; added "YOY fish diversity" an "yoy fish richness" to [O]	(Shore* OR Bay* OR Coast* OR Estuar* OR Lagoon* OR Lake* OR Intertid* OR Nears$hore* OR Shallow OR Seagrass* OR Seaweed* OR Wetland* OR marina* OR floodplain* OR fiord* OR mudflat* OR saltmarsh* OR eelgrass* OR “Biogenic habitat” OR “Habitat forming specie*” OR “Kelp forest*” OR “Mussel bed*” OR “Oyster bed*” OR “Sabellaria bed*” OR “Sand bank*” OR “Shellfish habitat*” OR littoral OR marsh* OR ma…	8503
11/12/2015	Added "maerl bed" and "*" to "littoral" to capture "eulitoral" and "sublittoral"; addedd missing quotation marks	(Shore* OR Bay* OR Coast* OR Estuar* OR Lagoon* OR Lake* OR Intertid* OR Nears$hore* OR shallow OR seagrass* OR Seaweed* OR Wetland* OR marina* OR floodplain* OR fiord* OR mudflat* OR saltmarsh* OR eelgrass* OR "Biogenic habitat" OR "Habitat forming specie*" OR "Kelp forest*" OR "Mussel bed*" OR "Oyster bed*" OR "Sabellaria bed*" OR "Sand bank*" OR "Shellfish habitat*" OR *littoral OR marsh* OR m…	8,511
2016-02-04	Final	(Shore* OR Bay* OR Coast* OR Estuar* OR Lagoon* OR Lake* OR Intertid* OR Near$shore* OR shallow OR seagrass* OR Seaweed* OR Wetland* OR marina* OR floodplain* OR fiord* OR mudflat* OR saltmarsh* OR eelgrass* OR "Biogenic habitat*" OR "Habitat-forming specie*" OR "Kelp forest*" OR "Mussel bed*" OR "Oyster bed*" OR "Sabellaria bed*" OR "Sand bank*" OR "Shellfish habitat*" OR *littoral OR marsh* OR …	8663 (number is changing!) all database, core collection only -7,364	all databases

## Sheet: Database searches
1. Database searches (including search update)
No.	Database name	Link	Date of search	Note on search	Search string	Number of hits	Difference to the WOS	Search update: Yes/No	Date of search [update]	Search limitations applied	Search update: number of hits
1	Academic Search Premier (ASP)	http://www.ebscohost.com/academic/academic-search-premier	2016-02-09	[Title/abstract/keyword/subject (=keyword search of the subject headings listed in the records)]	AB/TI/KW/SU (Shore? OR Bay? OR Coast? OR Estuar? OR Lagoon? OR Lake? OR Intertid? OR Nears#hore? OR shallow OR seagrass? OR Seaweed? OR Wetland? OR marina? OR floodplain? OR fiord? OR mudflat? OR saltmarsh? OR eelgrass? OR "Biogenic habitat?" OR "Habitat-forming specie?" OR "Kelp forest?" OR "Mussel bed?" OR "Oyster bed?" OR "Sabellaria bed?" OR "Sand bank?" OR "Shellfish habitat?" OR ?littoral O…	104	wildcard ‘*’ replaced with ‘?’, '$' replaced with '#'	YES	2017-05-19	1/2015-12/2017	16
2	Aquatic Sciences and Fisheries Abstracts (ASFA)	http://search.proquest.com.ezp.sub.su.se/asfa/index	2016-02-10	Databases: Aquatic Science & Fisheries Abstracts (ASFA) Marine Biotechnology Abstracts & ASFA: Aquatic Sciences and Fisheries Abstracts, [Title/abstract], Language:English/Dutch/Swedish/German/Finnish/Danish/Spanish [no possibility of keyword searching],	(AB,TI(Shore* OR Bay* OR Coast* OR estuary* OR Lagoon* OR Lake* OR intertidal* OR Near*shore* OR shallow OR seagrass* OR Seaweed* OR Wetland* OR marina* OR floodplain* OR fiord* OR mudflat* OR saltmarsh* OR eelgrass* OR "Biogenic habitat*" OR "Habitat-forming specie*" OR "Kelp forest*" OR "Mussel bed*" OR "Oyster bed*" OR "Sabellaria bed*" OR "Sand bank*" OR "Shellfish habitat*" OR littoral OR ma…	1426	Deleted 'fish*', '*' before the word removed, changed '#' to '*', removed '?' and added exact word	YES	2017-05-10	2015-2017	429
3	Biological Abstracts	http://ovidsp.tx.ovid.com.ezp.sub.su.se/sp-3.18.0b/	2016-02-10	[Title/abstract]	Multiple search -SEE BELOW	175	basic search possible, only couple of search terms, only until 2002	NO
4	COPAC	http://copac.jisc.ac.uk/	2016-02-11	[Keyword] (searches all the record)	Multiple search -SEE BELOW	311	basic search possible only	NO
5	Directory of Open-Access Journals (DOAJ)	http://doaj.org/	2016-02-10	[Title/abstract]	Multiple search -SEE BELOW	6	basic search possible, only couple of search terms, title screening during downlaod	NO
6	GeoBase	https://www-engineeringvillage-com.ezp.sub.su.se/search/quick.url	2016-02-10	[ALL] - no title or keyword search available, restricted to english (=279) and spanish (=1), removed chinese and french references (=2)	((((Shore* OR Bay* OR Coast* OR Estuar* OR Lagoon* OR Lake* OR Intertid* OR "Near*shore*" OR shallow OR seagrass* OR Seaweed* OR Wetland* OR marina* OR floodplain* OR fiord* OR mudflat* OR saltmarsh* OR eelgrass* OR "Biogenic habitat*" OR "Habitat-forming specie*" OR "Kelp forest*" OR "Mussel bed*" OR "Oyster bed*" OR "Sabellaria bed*" OR "Sand bank*" OR "Shellfish habitat*" OR *littoral OR marsh…	280	changed '#' to '*', removed '?' and added exact word,	YES	2017-05-19	2015-2017	45
7	Web of Science	http://apps.webofknowledge.com.ezp.sub.su.se/	2016-02-04	Core collections [title/abstract/keywords]: SCI-EXPANDED, SSCI, A&HCI, CPCI-S, CPCI-SSH, BKCI-S, BKCI-SSH, ESCI.	(Shore* OR Bay* OR Coast* OR Estuar* OR Lagoon* OR Lake* OR Intertid* OR Nears$hore* OR shallow OR seagrass* OR Seaweed* OR Wetland* OR marina* OR floodplain* OR fiord* OR mudflat* OR saltmarsh* OR eelgrass* OR "Biogenic habitat*" OR "Habitat-forming specie*" OR "Kelp forest*" OR "Mussel bed*" OR "Oyster bed*" OR "Sabellaria bed*" OR "Sand bank*" OR "Shellfish habitat*" OR *littoral OR marsh* OR …	7383	NA	YES	2017-05-09	2015-2017	1410
8	JSTOR	http://www.jstor.org/	2016-02-09	[Abstract/item title]	Multiple search -SEE BELOW	113	basic search possible, only couple of search terms	NO
9	PiCarta	http://www.picarta.nl/	2016-06-03	(search perfomed by Klemens Britas Eriksson, Groningen University subsctiption)	(fish recruitment OR YOY OR young of the year OR fish juvenile OR fish larvae OR fish nursery OR fish spawning OR fish reproduction OR CPUE) AND (habitat OR man-made OR anthropogenic OR artificial structure OR change OR degradation OR restoration OR reclamation OR armoring OR beam trawl OR cable OR dock OR drainage OR dredging OR pier OR pipe OR port OR wind farm OR wind turbine OR ship wreck OR …	255	no wildcards used	NO
10	Scopus	http://www.scopus.com/	2016-02-05	[Title/abstract/keyword]	TITLE-ABS-KEY ( ( shore* OR bay* OR coast* OR estuar* OR lagoon* OR lake* OR intertid* OR near*shore* OR shallow OR seagrass* OR seaweed* OR wetland* OR marina* OR floodplain* OR fiord* OR mudflat* OR saltmarsh* OR eelgrass* OR {Biogenic habitat} OR {Biogenic habitats} OR {Habitat-forming species} OR {Kelp forest} OR {Kelp forests} OR {Mussel bed} OR {Mussel beds} OR {Oyster bed} OR {Oyster beds}…	8073	"" changed to {}, '$' changed to '?', addedd plurals of the phrases as * was not functional within phrases in brackets{}	NO
11	SwePub	http://swepub.kb.se/	2016-02-11	Extended search	("age0" OR "age 0" OR "fish juvenile*" OR "fish larva*" OR "fish nurser*" OR "fish recruit*" OR "YOY" OR "Young of year" OR "Young-of-year" OR "Young-of-the-year" OR "Young of the year" OR "0group" OR "0 group" OR "fish spawn*" OR "fish reproduct*" OR "CPUE" OR "0+fish*" OR "fish abundance*" OR "fish densit*" OR "fish diversit*" OR "fish rich*")	296	Outcome terms only (combinations not possible), all wildcards except '*' discarded and used full words instead	YES	2017-05-26	2015-2017	52
12	DART-Europe E thesis	http://www.dart-europe.eu/basic-search.php	2016-02-12	General search	Multiple search -SEE BELOW	34	basic search possible, searched for outcome terms	NO
13	EthOS (British Library)	http://ethos.bl.uk/Home.do	2016-02-12	[Title/Secondary title/Abstract]	age0 OR "age 0" OR "fish juvenile*" OR "fish larva*" OR "fish nurser*" OR "fish recruit*" OR "YOY" OR "Young of year" OR "Young-of-year"	51	basic search possible, searched for outcome terms	NO
14	Index to Theses Online (ProQuest Dissertations & Theses A&I)	http://search.proquest.com.ezp.sub.su.se/pqdt/index?accountid=38978	2016-02-12	[Title/abstract], Language:English/Dutch/Swedish/German/Finnish/Danish/Spanish [no possibility of keyword searching],	(AB,TI(Shore* OR Bay* OR Coast* OR estuary* OR Lagoon* OR Lake* OR intertidal* OR Near*shore* OR shallow OR seagrass* OR Seaweed* OR Wetland* OR marina* OR floodplain* OR fiord* OR mudflat* OR saltmarsh* OR eelgrass* OR "Biogenic habitat*" OR "Habitat-forming specie*" OR "Kelp forest*" OR "Mussel bed*" OR "Oyster bed*" OR "Sabellaria bed*" OR "Sand bank*" OR "Shellfish habitat*" OR littoral OR ma…	539	Deleted 'fish*', '*' before the word removed, changed '#' to '*', removed '?' and added exact word	NO
15	CAB Abstracts		2016-05-10	(search perfomed by Lars Gosta Rudstam, Cornell University subscription)	(Shore* OR Bay* OR Coast* OR Estuar* OR Lagoon* OR Lake* OR Intertid* OR Nears$hore* OR shallow OR seagrass* OR Seaweed* OR Wetland* OR marina* OR floodplain* OR fiord* OR mudflat* OR saltmarsh* OR eelgrass* OR "Biogenic habitat*" OR "Habitat-forming specie*" OR "Kelp forest*" OR "Mussel bed*" OR "Oyster bed*" OR "Sabellaria bed*" OR "Sand bank*" OR "Shellfish habitat*" OR *littoral OR marsh* OR …	3504	None	NO
	Total (including duplicates)					22550					1952
	Grand total (including duplicates)										24502

## Sheet: Specialist websites
				2. Specialist websites searches
	Organisaton name	Website	Publication search page	Date of search	Who searched (BM=Biljana Macura, JGS= Josianne G. Støttrup, KV=Kevin Vikström, FE= Filippa Ek)	Comment	Keywords/Search string	Relevant articles/Total number of hits	Keywords/Search string2	Relevant articles/Total number of hits2	Keywords/Search string3	Relevant articles/Total number of hits3	Keywords/Search string4	Relevant articles/Total number of hits4	Keywords/Search string5	Relevant articles/Total number of hits5	Keywords/Search string6	Relevant articles/Total number of hits6	Keywords/Search string62	Relevant articles/Total number of hits7	Location of the pdf-s	Total number of relevant publications after screening on title	Relevant full texts - title/author
1	Baltic Marine Environment Protection Commission (www.helcom.fi)	www.helcom.fi	NA	11.5. 2017	BM	No search function on the publication page, screened through available publications on the website	http://www.helcom.fi/helcom-at-work/publications/	NR	BALTIC SEA ENVIRONMENTAL PROCEEDINGS> http://www.helcom.fi/helcom-at-work/publications/baltic-sea-environment-proceedings/	NR	http://www.helcom.fi/helcom-at-work/publications/other-helcom-reports/	NR	NA									0			NR=No relevant literature
2	Centre for Environment, Fisheries and Aquaculture Science (www.cefas.co.uk)	www.cefas.co.uk	NA	11.5. 2017	BM	No publications																0
3	Danish Centre for Environment and Energy (www.dce.au.dk)	www.dce.au.dk	In English, http://pure.au.dk/portal/da/organisations/8000/publications.html	11.5. 2017	BM		fish recruitment	1/10	(YOY), (fish nursery) (Note: searched separately for these two terms)	0/0	fish juvenile	1/20 (duplicate)	fish larvae	0/11							Local copy - Search update/Websites/DCE	1
			in Danish, http://pure.au.dk/portal/da/organisations/8000/publications.html	22.5.2017	JGS		opvækstområder	0/5	juvenile fisk	1/60	fiskelarver	0/16	(CPUE fisk*), (YOY fisk*)	0/6	rekruttering fisk*	0/2	(0-gruppe fisk*), (reproduktion fisk*)	0/3			DROPBOX - 0.Searching/Search_update/Websites_Josianne	1	Effects of Regulated River Flows on Habitat Suitability for the Robust Redhorse, Transactions of the American Fisheries Society, 144:4, 792-806, DOI: 10.1080/00028487.2015.1042557
4	European Commission Joint Research Centre (www.ec.europa.eu/dgs/jrc)	www.ec.europa.eu/dgs/jrc	http://publications.jrc.ec.europa.eu/repository/simple-search?	12.5.2017	BM	Reports on stocks, trends, predictions, distribution, regulations and guidelines	"fish recruitment"	0/22	("fish juvenile"), ("fish spawning")	0/14	"fish larva*"	0/18	"artificial reef"	0/11	fish nursery	0/9						0
5	European Environment Agency (www.eea.europa.eu)	www.eea.europa.eu	https://www.eea.europa.eu/publications#c14=&c12=&c7=en&c11=5&b_start=0	12.5.2017	BM	Reports on state of the environemtn, biodiversity, env. Indicators, thematic assessments, baselines, and guidelines…	fish	0/5	marine	0/39	recruitment	0/0										0
6	The European Fisheries and Aquaculture Research Organisation (http://www.efaro.eu/)	http://www.efaro.eu/	http://efaro.eu/reports-2.html	16.5.2017	BM	No search function on the publication page, screened through available publications on the website: meeting reports, vision, research priorities, consultations..	Searched all published reports															0
7	FAO Fisheries and Aquaculture (http://www.fao.org/fishery/en)	http://www.fao.org/fishery/en	http://www.fao.org/fishery/publications/search/en	12.5.2017	BM	Reports on fish trade, pracing, fisheries, poverty and fish, governance and management, nurtrition	Title="fish recruitment" (publication search)	0/0	Title=fish (publication search)	0/200	Title=fish spawning	0/0	Title=fish nursery	0/0								0
8	Natural Resources Institute Finland (http://www.luke.fi)	http://www.luke.fi	In English, https://www.luke.fi/en/category/fish/?post_type=julkaisu	12.5.2017	BM		Publications from subject: Fish	0/2	Publications from subject: Environment	0/4												0
		https://www.luke.fi/julkaisut/	in Finnish	15.6.2017	KV	Mostly rivers and surveys on fish populations, very little connection to physical change	Poikaistuotantoalueet	1/1	Poikaistuotanto	0/1	Kalojen kutu	0/2	yksikkösaalis	0/2	Rakennustyö	0/4	Satama	0			email: Kevin vikstrom/local copy websites/finnish	1
9	Finland’s environmental administration (www.environment.fi)	www.environment.fi	In English	12.5.2017	BM	Reports on pollution and env toxins, state of the environment, list of species, monitoring, climate change	"("age0" OR "age 0" OR "fish juvenile*" OR "fish larva*" OR "fish nurser*" OR "fish recruit*" OR "YOY" OR "Young of year" OR "Young-of-year" OR "Young-of-the-year" OR "Young of the year" OR "0*group" OR "fish spawn*" OR "fish reproduce*" OR "CPUE" OR "0+fish*" OR "fish abundance*" OR "fish density*" OR "fish diversity*" OR "fish rich*")".	0	Fish	0/3 pages of hits												0
			in Finnish	15.6.2017	KV	Mostly governmnet assessments on expanding harbours, windpower parks and dredging	kalakut	0	Kalapoikaisia	0	Kalatuotanto	0/1	Yksikkösaalis	0/2	Satama & Tuulivoima	0/8 (0/4)	Rakennustyö	0	Ruoppaus	0/6		0
10	Fisheries and Oceans Canada (www.dfo-mpo.gc.ca/index-eng.htm)	www.dfo-mpo.gc.ca/index-eng.htm	http://www.dfo-mpo.gc.ca/reports-rapports-eng.htm#n6	12.5.2017	BM	Google search function, reports on status, toxicity, distribution…	"fish recruitment" OR YOY OR "young of the year" OR "young of year" OR "age 0" OR "fish juvenile"	0/cc. 101	fish nursery OR "0 group" OR "fish spawning" OR "fish reproduction" OR "CPUE" OR "0+fish"	0/cc. 2760 (checked first 150)	fish larvae	0/0										0
11	Fisheries and Oceans Canada - WAVES database	http://waves-vagues.dfo-mpo.gc.ca/waves-vagues/	http://fsl-bsf.summon.serialssolutions.com/en/advanced	26.5.2017	BM	Search limited to the DFO collection (formerly known as WAVES). Excluded: newspaper articles; languages: Chinese, Indonesian, Portuguese, French (English and Spanish included). Searched on title, subject terms and abstract	(((Abstract:((Shore* OR Bay* OR Coast* OR Estuar* OR Lagoon* OR Lake* OR Intertid* OR "Near*shore*" OR shallow OR seagrass* OR Seaweed* OR Wetland* OR marina* OR floodplain* OR fiord* OR mudflat* OR saltmarsh* OR eelgrass* OR "Biogenic habitat*" OR "Habitat-forming specie*" OR "Kelp forest*" OR "Mussel bed*" OR "Oyster bed*" OR "Sabellaria bed*" OR "Sand bank*" OR "Shellfish habitat*" OR *littora…	124														124
12	Great Lakes Fisheries Commission (http://www.glfc.org/)	http://www.glfc.org/	http://www.glfc.org/pubs/pub.htm	11.5. 2017	BM		(recruitment), (nursery), (YOY), (Juvenile), (age 0), (anthro*), (dredg*), (nursery), (pier), (frag),	0/0	man	4/41	(degradation), (artificial), (trawl)	0/1	restoration	0/2	change	1/6					Local copy -Search update/Websites/GLFC	5
13	Greenpeace (www.greenpeace.org/)	www.greenpeace.org/	http://www.greenpeace.org/international/en/publications/Campaign-reports/Oceans-Reports/	11.5. 2017	BM		Oceans campaign report	0/110														0
14	International Council for the Exploration of the Sea (www.ices.dk)	www.ices.dk	http://www.ices.dk/publications/library/Pages/advanced.aspx	15.5.2017	BM	Reports on recruitment but no exposure, biology, life history, modeling, trends stock predictions reports, species interactions (predators), expert group and progress reports, reports from workshops (no field research studies)	fish recruitment ANY (YOY juvenile larvae)	0/288	ALL(man-made artificial restore degradation enhancement)	0/28	ALL(anthropogenic) "0 group" ANY(nurser* spawn* age-0 0+fish)	0/212	artificial structure	0/10								0
15	IVL Swedish Environmental Research Institute (www.ivl.se)	www.ivl.se	In English, http://www.ivl.se/sidor/publikationer.html	15.5.2017	BM	Ecotoxicology	fish	0/70	fish RECRUITMENT	0/0	FISH JUVENILES	0/0	artificial structure	0/0								0
			In Swedish, http://www.ivl.se/sidor/publikationer.html	16.5.2017	FE	Ecotoxicology		0														0
16	National Marine Fisheries Service (http://www.nmfs.noaa.gov/)	http://www.nmfs.noaa.gov	NA	16.5.2017	BM	No publication section, search function has untargeted search (several websites)																0
17	The Nature Conservancy (http://www.nature.org/)	http://www.nature.org/	http://conservationgateway.org/Pages/Advanced-Search.aspx	18.5.2017	BM	Publications on treats to specific species, EIA, management plans, climate change impacts, watershed flow evaluation reports, fire, guides for implementation of conservation projects, reviews, recommendations,	"fish recruitment"	5/17 (5 reports on the same project)	"fish juveniles"	0/1	young of year fish (no quotations)	4/416	"fish larvae"	1/15	fish nursery	0/13	Fish spawning	4/122 (1 duplicate)			Local copy --Search update/Websites/TNC	14
18	The Royal Netherlands Institute of Sea Research (http://www.nioz.nl/home_en)	http://www.nioz.nl/home_en	https://www.nioz.nl/en/search	18.5.2017	BM	Filter - publications	"fish recruitment"	0/22	"fish juveniles"	0/27	young of year fish (no quotations)	0/26	"fish larvae"	0/22	fish nursery	0/20						0
19	Senckenberg (http://www.senckenberg.de/)	http://www.senckenberg.de/	in English and German, http://www.senckenberg.de/root/index.php?page_id=2983	16.5.2017	BM	Publications are scientific papers, books and journals. No specific publications of our interest																0
20	Swedish Agency for Marine and Water Management (www.havochvatten.se)	www.havochvatten.se	In Swedish only, https://www.havochvatten.se/hav/uppdrag--kontakt/publikationer.html	16.5.2017	FE	Publications after 1.7.2011 about seas, Baltic, marine biology, fishes, fishery biology	Habitat	1/3	Konstgjorda	1/1	Restaurering	3/7	Bomtrål	2/2	Muddring	1/3	Fiskreproduktion	1/1			DROPBOX - 0.Searching/Search_update/Websites_Filippa	9
			In Swedish only, https://www.havochvatten.se/hav/uppdrag--kontakt/publikationer/aldre-publikationer.html	16.5.2017	FE	Older publications before 1.7.2011. Publications about seas, Baltic, marine biology, fishes, fishery biology	Habitat	3/6	Förändring, Anslutning	2/7	Förlust	2/5	Tillbakagång	1/4	Restaurering, Fiskrekrytering	1/3	Muddring	1/1	Hamn	1/11	DROPBOX - 0.Searching/Search_update/Websites_Filippa	14
21	Swedish Environment Protection Agency (www.naturvardsverket.se)	http://www.naturvardsverket.se/	In Swedish only, http://www.naturvardsverket.se/Om-Naturvardsverket/Publikationer/	16.5.2017	FE	Mostly focus on terrestrial ecosystems: biology, land environment, agriculture, forest, urban areas etc.	Restaurering	1/40	Brygga	1/3	Fartyg	1/5									DROPBOX - 0.Searching/Search_update/Websites_Filippa	3
22	United Nations Environment Programme (www.unep.org)	http://www.unep.org/	http://www.unep.org/publications/	18.5.2017	BM		"fish recruitment"	0/0	"fish juveniles"	0/0	fish	4	"fish larvae"	0								0
23	United States Environmental Protection Agency (www.epa.gov)	http://www3.epa.gov/	https://www.epa.gov/home/advanced-search	18.5.2017	BM	Advanced search - in title, EPA.gov	intitle:"fish recruitment"	0/0	intitle:"fish juveniles"	0/0	intitle:"fish larvae"	0/1	intitle:fish larvae nearshore	0/9	intitle:fish YOY nearshore artificial	1/2	intitle:Essential Fish Habitat	1 /12			Local copy --Search update/Websites/EPA	2
24	World Wildlife Fund WWF (http://wwf.org/)	http://wwf.org/	http://wwf.panda.org/about_our_earth/all_publications/	18.5.2017	BM	Marine, & oceans and coasts	"fish recruitment"	0/0	"fish juveniles"	0/0	fish larvae	0/0										0
			http://wwf.panda.org/about_our_earth/all_publications/	18.5.2017	BM	Rivers, Lakes & Wetlands	"fish recruitment"	0/0	"fish juveniles"	0/0	fish larvae	0/9										0
																						174	TOTAL

## Sheet: Bibliographies of reviews
3. Searches in bibliographies of relevant reviews
a. Relevant reviews								b. Relevant articles found in reviews
Authors	Title	Year	Full reference	Relevant review (YES/NO)	How many relevant titles from the reference list found? (NUMBER)	PDFS of these relevant titles downloaded to dropbox? (YES/NO)		Author	Title	Year	Already exist in EPPI (Y/N)	Received from (1st author and year)	Title (received from the review-article:)	Downloaded? (YES/NO)
Arthington A H; Dulvy N K; Gladstone W ; Winfield I J;	Fish conservation in freshwater and marine realms: status, threats and management	2016	Arthington, A. H., Dulvy, N. K., Gladstone, W., & Winfield, I. J. (2016). Fish conservation in freshwater and marine realms: status, threats and management. Aquatic Conservation: Marine and Freshwater Ecosystems, 26(5), 838-857. DOI: 10.1002/aqc.2712	YES	1	YES		Adrizzone GD, Belluscio A, Somaschini A	Fish colonisation and feeding habitats on a Mediterranean artificial habitat. In: Hawking LE, Hutchinsons S. The responses of marine organisms to their environments. 1997	(in 1997)	NO	Baine (2001)	Artificial reefs: A review of their design, application, management and performance	No access
Baine M ;	Artificial reefs: A review of their design, application, management and performance	2001	Baine, M. (2001). Artificial reefs: a review of their design, application, management and performance. Ocean & Coastal Management, 44(3-4), 241-259. DOI: 10.1016/S0964-5691(01)00048-5	YES	8	YES		Arculeo M, Bombace G, D'Anna G, Riggio S.	Evaluation of fishing yields in a protected and an unprotected coastal area of N/W Sicily.	1990	NO	Jensen (2002)	Artificial reefs of Europe: Perspective and future	E-book: https://books.google.se/books?id=DoiovEKV0WcC&lpg=PA70&ots=ZrDRLJlQR3&dq=Evaluation%20of%20fishing%20yields%20in%20a%20protected%20and%20an%20unprotected%20coastal%20area%20of%20N%2FW%20Sicily.&pg=PA70#v=onepage&q=Evaluation%20of%20fishing%20yields%20in%20a%20protected%20and%20an%20unprotected%20coastal%20area%20of%20N/W%20Sicily.&f=false
Bohnsack J A; Sutherland D L;	Artificial reef research: a review with recommendations for future priorities	1985	Bohnsack, J. A., & Sutherland, D. L. (1985). Artificial reef research: a review with recommendations for future priorities. Bulletin of marine science, 37(1), 11-39.	YES	13	YES		Arnold EL Jr.	Man's Alternations of Estauries by Dredging and Filling a Grave Threat to Marine Resources	1964	NO	Ford (1983)	An annotated bibliography on the biological effects of constructing channels, jetties, and other coastal structures ( fish, shellfish migration)	No access
Brinkhuis B H;	Biological effects of sand and gravel mining in the Lower Bay of New York Harbor: an assessment from the literature	1980	Brinkhuis, B. H. (1980). Biological effects of sand and gravel mining in the Lower Bay of New York Harbor: an assessment from the literature. New York Sea Grant Institute. Special report 34. Reference no. 80-1.	YES	0	YES		Bohnsack JA, Harper DE, McClellan DB, Hulsbeck M.	Effects of reef size on colonization and assemblage structure of fishes at artificial reefs off southeastern Florida, USA.	1994	NO	Baine (2001)	Artificial reefs: A review of their design, application, management and performance	YES
Ford J C; Hurme A K; Pullen E J;	An annotated bibliography on the biological effects of constructing channels, jetties, and other coastal structures ( fish, shellfish migration)	1983	Ford, J. C., Hurme, A. K., & Pullen, E. J. (1983). An Annotated Bibliography on the Biological Effects of Constructing Channels, Jetties, and other Coastal Structures (No. CERC-MR-83-2). COASTAL ENGINEERING RESEARCH CENTER FORT BELVOIR VA.	YES	5	YES		Carlisle JG Jr., Turner CH, Ebert EE	Artificial reefs in the marine environment.	1964	NO	Bohnsack (1985)	Artificial reef research: a review with recommendations for future priorities	Website: http://content.cdlib.org/view?docId=kt929006q1&brand=calisphere&doc.view=entire_text
Jensen A ;	Artificial reefs of Europe: Perspective and future	2002	Jensen, A. (2002). Artificial reefs of Europe: perspective and future. ICES journal of marine science, 59(suppl), S3-S13. DOI: 10.1006/jmsc.2002.1298	YES	1	YES		Dewees CM, Gotshall DW	An experimental reef in Humboldt Bay, California	1974	NO	Bohnsack (1985)	Artificial reef research: a review with recommendations for future priorities	No access
Moloney C L; Fennessy S T; Gibbons M J; Roychoudhury A ; Shillington F A; von der Heyden ; B P ; Watermeyer K ;	Reviewing evidence of marine ecosystem change off South Africa	2013	Moloney, C. L., Fennessy, S. T., Gibbons, M. J., Roychoudhury, A., Shillington, F. A., Von der Heyden, B. P., & Watermeyer, K. (2013). Reviewing evidence of marine ecosystem change off South Africa. African Journal of Marine Science, 35(3), 427-448. DOI: 10.2989/1814232X.2013.836135	YES	0	YES		Dos Santos MN. Montiero CC, Lassèrre G.	A four year overview of the fish assemblages and yield on two artificial reef system off Algarve (south Portugal). In: Hawking LE, Hutchinsons S. The responses of marine organisms to their environments. 1997	(in 1997)	NO	Baine (2001)	Artificial reefs: A review of their design, application, management and performance	No access
Newell R C; Seiderer L J; Hitchcock D R;	THE IMPACT OF DREDGING WORKS IN COASTAL WATERS: A REVIEW OF THE SENSITIVITY TO DISTURBANCE AND SUBSEQUENT RECOVERY OF BIOLOGICAL RESOURCES ON THE SEA BED	1998	Newell, R. C., Seiderer, L. J., & Hitchcock, D. R. (1998). The impact of dredging works in coastal waters: a review of the sensitivity to disturbance and subsequent recovery of biological resources on the sea bed. Oceanography and Marine Biology: An Annual Review, 36, 127-178.	YES	2	YES		Fast DE	Comparative studies of fish species and their populations on artificial and natural reefs off Puerto Rico	1974	NO	Bohnsack (1985)	Artificial reef research: a review with recommendations for future priorities	No access
Nienhuis P H; Bakker J P; Grootjans A P; Gulati R D; De Jonge ; V N ;	The state of the art of aquatic and semi-aquatic ecological restoration projects in the Netherlands	2002	Nienhuis, P. H., Bakker, J. P., Grootjans, A. P., Gulati, R. D., & De Jonge, V. N. (2002). The state of the art of aquatic and semi-aquatic ecological restoration projects in the Netherlands. In Ecological Restoration of Aquatic and Semi-Aquatic Ecosystems in the Netherlands (NW Europe) (pp. 219-233). Springer, Dordrecht. DOI: 10.1023/A:1021090900341	YES	0	YES		Funk JL, Robinsom JW	Changes in the Channel of the Lower Missouri River and Effects on Fish and Wildlife	1974	NO	Ford (1983)	An annotated bibliography on the biological effects of constructing channels, jetties, and other coastal structures ( fish, shellfish migration)	E-book without access: https://books.google.se/books/about/Changes_in_the_channel_of_the_Lower_Miss.html?id=iidDAAAAIAAJ&redir_esc=y
Schernewski G ; Schiewer U ;	Status, problems and integrated management of Baltic coastal ecosystems	2002	Schernewski, G., & Schiewer, U. (2002). Status, problems and integrated management of Baltic coastal ecosystems. In Baltic Coastal Ecosystems (pp. 1-16). Springer, Berlin, Heidelberg. DOI: 10.1007/978-3-662-04769-9	YES	0	YES		Hawkins LE, Hutchinson S.	The responses of marine organisms to their environments.	1997	NO	Baine (2001)	Artificial reefs: A review of their design, application, management and performance	E-book without access: https://books.google.se/books/about/The_Responses_of_Marine_Organisms_to_The.html?id=HXAVAQAAIAAJ&redir_esc=y
Seaman W ;	Artificial habitats and the restoration of degraded marine ecosystems and fisheries	2007	Seaman, W. (2007). Artificial habitats and the restoration of degraded marine ecosystems and fisheries. Hydrobiologia, 580(1), 143-155. DOI: 10.1007/s10750-006-0457-9	YES	2	YES		Houghton MW, Aiken KA	Biological notes o artificial reefs in Jamaican waters.	1989	NO	Baine (2001)	Artificial reefs: A review of their design, application, management and performance	YES
Wilson, William J.	Synthesis in applied fish ecology: Twenty years of studies on effects of causeway development on fish populations in the Prudhoe Bay region, Alaska	1997	Wilson, W. J., & Gallaway, B. J. (1997). Synthesis in applied fish ecology: Twenty years of studies on effects of causeway development on fish populations in the Prudhoe Bay region, Alaska. In American Fisheries Society Symposium (Vol. 19, pp. 326-339).	YES	No access to full text	NO		Ingle R. M.	Studies on the effect of dredging operations on fish and shellfish.	1952	NO	Newell (1998)	THE IMPACT OF DREDGING WORKS IN COASTAL WATERS: A REVIEW OF THE SENSITIVITY TO DISTURBANCE AND SUBSEQUENT RECOVERY OF BIOLOGICAL RESOURCES ON THE SEA BED	YES, only abstract
Guillory V ;	Environmental effects of estuarine dredging and spoil disposal, a literature review	1982	Guillory, V. (1982). Environmental effects of estuarine dredging and spoil disposal, a literature review. Contributions of the Marine Research Laboratory, Technical Bulletin, 35, 37-61.	YES	No access to full text	NO		Ingle R. M.	Studies on the effect of dredging operations on fish and shellfish.	1952	NO	Ford (1983)	An annotated bibliography on the biological effects of constructing channels, jetties, and other coastal structures ( fish, shellfish migration)	YES, only abstract
Mulvihill E L; Francisco C A; Glad J B; Kaster K B; Wilson R E;	Biological impacts of minor shoreline structures on the coastal environment: state of the art review, volume 1	1980	Mulvihill, E. L., Francisco, C. A., Glad, J. B., Kaster, K. B., & Wilson, R. E. (1980). Biological impacts of minor shoreline structures on the coastal environment: state of the art review. Volume I (No. FWS/OBS-77/51).	YES	No access to full text	NO		Johnson RK	Hydrographic and Ecological Effects of the Chesapeake and Delaware Canal. Appendix I. Production and Distribution of Fish Eggs and Larvae in C and D Canal.	1973	NO	Ford (1983)	An annotated bibliography on the biological effects of constructing channels, jetties, and other coastal structures ( fish, shellfish migration)	No access
Sale Peter F;	Reviewed Work: Webs and Scales: Physical and Ecological Processes in Marine Fish Recruitment.by Michael M. Mullin	1994	Sale Peter F (1994) Reviewed Work: Webs and Scales: Physical and Ecological Processes in Marine Fish Recruitment by Michael M. Mullin.	YES	No access to full text	NO		Kock RL	Patterns of abundance variation in reef fishes near an artificial reef at Guam	1982	NO	Bohnsack (1985)	Artificial reef research: a review with recommendations for future priorities	YES
								Koenig CC.	Oculina banks: Habitat, fish populations, restoration and enforcement.	2001	NO	Seaman (2007)	Artificial habitats and the restoration of degraded marine ecosystems and fisheries	YES
								Matsumoto WM, Kazama TK, Aasted, DC	Anchored fish aggregating devices in Hawaiian waters	1981	NO	Bohnsack (1985)	Artificial reef research: a review with recommendations for future priorities	YES
								Menzel RW	Effects of Man's Activities on Estaurine Fisheries	1971	NO	Ford (1983)	An annotated bibliography on the biological effects of constructing channels, jetties, and other coastal structures ( fish, shellfish migration)	No access
								Miyazaki C, Sawada T	Studies on value judgement of fishing grounds with natural fish reefs and artificial fish reefs. I. Relationship between natural fish reefs and artificial ones.	1978	NO	Bohnsack (1985)	Artificial reef research: a review with recommendations for future priorities	No access
								Ogawa Y	Experiments on the attractivieness of artificial reefs for marine fishes. IV. Attraction of stone bream and rudderfish to black objects on the white background.	1966	NO	Bohnsack (1985)	Artificial reef research: a review with recommendations for future priorities	No access
								Stone RB, Pratt HL, Parker RO, Davis GE	A comparison of fish populations on an artifical and natural reefs in the Florida Keys	1979	NO	Bohnsack (1985)	Artificial reef research: a review with recommendations for future priorities	YES
								Rountree RA.	Association of fishes with fish aggregation devices: effects of structure size on fish abundance.	1989	NO	Baine (2001)	Artificial reefs: A review of their design, application, management and performance	YES
								Smith GB, Hensley DA, Mathews HH	Comparative efficacy of artificial and natural Gulf of Mexico reefs as fish attractants	1979	NO	Bohnsack (1985)	Artificial reef research: a review with recommendations for future priorities	YES
								Takemura Y, Ogawa Y	Experiments on the attractivieness of artificial reefs for marine fishes. II. An automatic recording device .	1966	NO	Bohnsack (1985)	Artificial reef research: a review with recommendations for future priorities	No access
								Turner CH, Ebert EE, Given RR	Man-made reef ecology.	1969	NO	Bohnsack (1985)	Artificial reef research: a review with recommendations for future priorities	Website: http://content.cdlib.org/view?docId=kt2x0n9933&brand=calisphere&doc.view=entire_text
								Wilson KDP, Leung AWY, Kennish P.	Restoration of Hong Kong fisheries through deployment of artificial reefs in marine protected areas.	2002	NO	Seaman (2007)	Artificial habitats and the restoration of degraded marine ecosystems and fisheries	YES
								Workman IK, Watson JW	Artificial reefs as refuge for juvenile red snappers (Lutjanus campechanus) on shrimp fishing grounds in the Gulf of Mexico. In: ECOSET '95, the International Conference on Ecological System Enchancement Technology for Aquatic Environments, Conference Proceedings, vol. 1 and 2, Tokyo, Japan.	(in 1995)	NO	Baine (2001)	Artificial reefs: A review of their design, application, management and performance	No access

## Sheet: GS_English
4a. Google Scholar searches in English
Google Scholar (www.scholar.google.com)
[limited to one ‘phrase’ (i.e. enclosed in double quotation marks), one ‘OR’ substring, and 256 characters]
[including patents and citations]
Exposure Search string	("artificial reef*" OR "artificial structure*" OR armo$r* OR "beam trawling" OR cable* OR dock* OR drain* OR dredg* OR "habitat change*" OR "habitat degradation*" OR "habitat loss*" OR "habitat restoration*" OR pier* OR pipe$ OR port$ OR reclamation* OR "wind farm*" OR "wind turbine*" OR "ship wreck*" OR "anthropogenic pressure*" OR man$made OR "hydrological connectivit*" OR seawall* OR "coastal …
Outcome Search string	fish recruitment OR YOY OR "young of the year" OR "young of year" OR "age 0" OR "fish juvenile" OR "fish larvae" OR "fish nursery" OR "0 group" OR "fish spawning" OR "fish reproduction" OR "CPUE" OR "0+fish"
Outcome search string TESTING				Intervention/Exposure search terms		[last term replaced as in table below]
Final search term	Number of Results	Date		Final search term	Number of Results	Date	Full search string	Downloaded	note	URL	Update 2015-2017	Date2
"fish recruitment"	416	2016-02-16		habitat	379	2016-02-17	allintitle:"fish recruitment" OR YOY OR "young of the year" OR "young of year" OR "age 0" OR "fish juvenile" OR "fish larvae" OR "fish nursery" OR "0 group" OR "fish spawning" OR "fish reproduction" OR "CPUE" OR "0+fish" habitat	361		https://scholar.google.se/scholar?q=allintitle%3A%22fish+recruitment%22+OR+YOY+OR+%22young+of+the+year%22+OR+%22young+of+year%22+OR+%22age+0%22+OR+%22fish+juvenile%22+OR+%22fish+larvae%22+OR+%22fish+nursery%22+OR+%220+group%22+OR+%22fish+spawning%22+OR+%22fish+reproduction%22+OR+%22CPUE%22+OR+%220%2Bfish%22+habitat	39	19.5. 2017
"YOY"	116	2016-02-16		man-made	4	2016-02-17	allintitle:"fish recruitment" OR YOY OR "young of the year" OR "young of year" OR "age 0" OR "fish juvenile" OR "fish larvae" OR "fish nursery" OR "0 group" OR "fish spawning" OR "fish reproduction" OR "CPUE" OR "0+fish" man-made	0		https://scholar.google.se/scholar?q=allintitle%3A%22fish+recruitment%22+OR+YOY+OR+%22young+of+the+year%22+OR+%22young+of+year%22+OR+%22age+0%22+OR+%22fish+juvenile%22+OR+%22fish+larvae%22+OR+%22fish+nursery%22+OR+%220+group%22+OR+%22fish+spawning%22+OR+%22fish+reproduction%22+OR+%22CPUE%22+OR+%220%2Bfish%22+man-made	0	19.5. 2017
"young of the year"	957	2016-02-16		anthropogenic	10	2016-02-17	allintitle:"fish recruitment" OR YOY OR "young of the year" OR "young of year" OR "age 0" OR "fish juvenile" OR "fish larvae" OR "fish nursery" OR "0 group" OR "fish spawning" OR "fish reproduction" OR "CPUE" OR "0+fish" anthropogenic	9		https://scholar.google.se/scholar?q=allintitle%3A%22fish+recruitment%22+OR+YOY+OR+%22young+of+the+year%22+OR+%22young+of+year%22+OR+%22age+0%22+OR+%22fish+juvenile%22+OR+%22fish+larvae%22+OR+%22fish+nursery%22+OR+%220+group%22+OR+%22fish+spawning%22+OR+%22fish+reproduction%22+OR+%22CPUE%22+OR+%220%2Bfish%22+anthropogenic	4	19.5. 2017
"young of year"	293	2016-02-16		"artificial structure"	0	2016-02-17	allintitle:"fish recruitment" OR YOY OR "young of the year" OR "young of year" OR "age 0" OR "fish juvenile" OR "fish larvae" OR "fish nursery" OR "0 group" OR "fish spawning" OR "fish reproduction" OR "CPUE" OR "0+fish" "artificial structure"	NO			0	19.5. 2017
"age 0"	944	2016-02-16		change	45	2016-02-17	allintitle:"fish recruitment" OR YOY OR "young of the year" OR "young of year" OR "age 0" OR "fish juvenile" OR "fish larvae" OR "fish nursery" OR "0 group" OR "fish spawning" OR "fish reproduction" OR "CPUE" OR "0+fish" change	43	no results in combination with "habitat"	https://scholar.google.se/scholar?q=allintitle%3A%22fish+recruitment%22+OR+YOY+OR+%22young+of+the+year%22+OR+%22young+of+year%22+OR+%22age+0%22+OR+%22fish+juvenile%22+OR+%22fish+larvae%22+OR+%22fish+nursery%22+OR+%220+group%22+OR+%22fish+spawning%22+OR+%22fish+reproduction%22+OR+%22CPUE%22+OR+%220%2Bfish%22+change	4	19.5. 2017
"fish juvenile"	61	2016-02-16		complexity	19	2016-02-17	allintitle:"fish recruitment" OR YOY OR "young of the year" OR "young of year" OR "age 0" OR "fish juvenile" OR "fish larvae" OR "fish nursery" OR "0 group" OR "fish spawning" OR "fish reproduction" OR "CPUE" OR "0+fish" complexity	7	no results in combination with "habitat"	https://scholar.google.se/scholar?q=allintitle%3A%22fish+recruitment%22+OR+YOY+OR+%22young+of+the+year%22+OR+%22young+of+year%22+OR+%22age+0%22+OR+%22fish+juvenile%22+OR+%22fish+larvae%22+OR+%22fish+nursery%22+OR+%220+group%22+OR+%22fish+spawning%22+OR+%22fish+reproduction%22+OR+%22CPUE%22+OR+%220%2Bfish%22+complexity	1	19.5. 2017
"fish larvae"	2490	2016-02-16		enhancement	10	2016-02-17	allintitle:"fish recruitment" OR YOY OR "young of the year" OR "young of year" OR "age 0" OR "fish juvenile" OR "fish larvae" OR "fish nursery" OR "0 group" OR "fish spawning" OR "fish reproduction" OR "CPUE" OR "0+fish" enhancement	7	no results in combination with "habitat"	https://scholar.google.se/scholar?q=allintitle%3A%22fish+recruitment%22+OR+YOY+OR+%22young+of+the+year%22+OR+%22young+of+year%22+OR+%22age+0%22+OR+%22fish+juvenile%22+OR+%22fish+larvae%22+OR+%22fish+nursery%22+OR+%220+group%22+OR+%22fish+spawning%22+OR+%22fish+reproduction%22+OR+%22CPUE%22+OR+%220%2Bfish%22+enhancement	1	19.5. 2017
"fish nursery"	94	2016-02-16		connectivity	10	2016-02-17	allintitle:"fish recruitment" OR YOY OR "young of the year" OR "young of year" OR "age 0" OR "fish juvenile" OR "fish larvae" OR "fish nursery" OR "0 group" OR "fish spawning" OR "fish reproduction" OR "CPUE" OR "0+fish" connectivity	10	no results in combination with "habitat"	https://scholar.google.se/scholar?q=allintitle%3A%22fish+recruitment%22+OR+YOY+OR+%22young+of+the+year%22+OR+%22young+of+year%22+OR+%22age+0%22+OR+%22fish+juvenile%22+OR+%22fish+larvae%22+OR+%22fish+nursery%22+OR+%220+group%22+OR+%22fish+spawning%22+OR+%22fish+reproduction%22+OR+%22CPUE%22+OR+%220%2Bfish%22+connectivity	3	19.5. 2017
"0 group"	462	2016-02-16		fragmentation	1	2016-02-17	allintitle:"fish recruitment" OR YOY OR "young of the year" OR "young of year" OR "age 0" OR "fish juvenile" OR "fish larvae" OR "fish nursery" OR "0 group" OR "fish spawning" OR "fish reproduction" OR "CPUE" OR "0+fish" fragmentation	1	no results in combination with "habitat"	https://scholar.google.se/scholar?q=allintitle%3A%22fish+recruitment%22+OR+YOY+OR+%22young+of+the+year%22+OR+%22young+of+year%22+OR+%22age+0%22+OR+%22fish+juvenile%22+OR+%22fish+larvae%22+OR+%22fish+nursery%22+OR+%220+group%22+OR+%22fish+spawning%22+OR+%22fish+reproduction%22+OR+%22CPUE%22+OR+%220%2Bfish%22+fragmentation	2	19.5. 2017
"fish spawn*"	43	2016-02-16		artificial	67	2016-02-17	allintitle:"fish recruitment" OR YOY OR "young of the year" OR "young of year" OR "age 0" OR "fish juvenile" OR "fish larvae" OR "fish nursery" OR "0 group" OR "fish spawning" OR "fish reproduction" OR "CPUE" OR "0+fish" artificial	60		https://scholar.google.se/scholar?q=allintitle%3A%22fish+recruitment%22+OR+YOY+OR+%22young+of+the+year%22+OR+%22young+of+year%22+OR+%22age+0%22+OR+%22fish+juvenile%22+OR+%22fish+larvae%22+OR+%22fish+nursery%22+OR+%220+group%22+OR+%22fish+spawning%22+OR+%22fish+reproduction%22+OR+%22CPUE%22+OR+%220%2Bfish%22+artificial	4	19.5. 2017
fish spawning	392	2016-02-16		degradation	3	2016-02-17	allintitle:"fish recruitment" OR YOY OR "young of the year" OR "young of year" OR "age 0" OR "fish juvenile" OR "fish larvae" OR "fish nursery" OR "0 group" OR "fish spawning" OR "fish reproduction" OR "CPUE" OR "0+fish" degradation	2		https://scholar.google.se/scholar?q=allintitle%3A%22fish+recruitment%22+OR+YOY+OR+%22young+of+the+year%22+OR+%22young+of+year%22+OR+%22age+0%22+OR+%22fish+juvenile%22+OR+%22fish+larvae%22+OR+%22fish+nursery%22+OR+%220+group%22+OR+%22fish+spawning%22+OR+%22fish+reproduction%22+OR+%22CPUE%22+OR+%220%2Bfish%22+degradation	3	19.5. 2017
"fish reproduction"	458	2016-02-16		loss	12	2016-02-17	allintitle:"fish recruitment" OR YOY OR "young of the year" OR "young of year" OR "age 0" OR "fish juvenile" OR "fish larvae" OR "fish nursery" OR "0 group" OR "fish spawning" OR "fish reproduction" OR "CPUE" OR "0+fish" loss	10		https://scholar.google.se/scholar?q=allintitle%3A%22fish+recruitment%22+OR+YOY+OR+%22young+of+the+year%22+OR+%22young+of+year%22+OR+%22age+0%22+OR+%22fish+juvenile%22+OR+%22fish+larvae%22+OR+%22fish+nursery%22+OR+%220+group%22+OR+%22fish+spawning%22+OR+%22fish+reproduction%22+OR+%22CPUE%22+OR+%220%2Bfish%22+loss&btnG=&hl=en&as_sdt=0%2C5	1	19.5. 2017
"CPUE”	1250	2016-02-16		restoration	15	2016-02-17	allintitle:"fish recruitment" OR YOY OR "young of the year" OR "young of year" OR "age 0" OR "fish juvenile" OR "fish larvae" OR "fish nursery" OR "0 group" OR "fish spawning" OR "fish reproduction" OR "CPUE" OR "0+fish" restoration	13		https://scholar.google.se/scholar?q=allintitle%3A%22fish+recruitment%22+OR+YOY+OR+%22young+of+the+year%22+OR+%22young+of+year%22+OR+%22age+0%22+OR+%22fish+juvenile%22+OR+%22fish+larvae%22+OR+%22fish+nursery%22+OR+%220+group%22+OR+%22fish+spawning%22+OR+%22fish+reproduction%22+OR+%22CPUE%22+OR+%220%2Bfish%22+restoration&btnG=&hl=en&as_sdt=0%2C5	5	19.5. 2017
“0+fish*"	132	2016-02-16		reclamation	2	2016-02-17	allintitle:"fish recruitment" OR YOY OR "young of the year" OR "young of year" OR "age 0" OR "fish juvenile" OR "fish larvae" OR "fish nursery" OR "0 group" OR "fish spawning" OR "fish reproduction" OR "CPUE" OR "0+fish" reclamation	2		https://scholar.google.se/scholar?q=allintitle%3A%22fish+recruitment%22+OR+YOY+OR+%22young+of+the+year%22+OR+%22young+of+year%22+OR+%22age+0%22+OR+%22fish+juvenile%22+OR+%22fish+larvae%22+OR+%22fish+nursery%22+OR+%220+group%22+OR+%22fish+spawning%22+OR+%22fish+reproduction%22+OR+%22CPUE%22+OR+%220%2Bfish%22+reclamation&btnG=&hl=en&as_sdt=0%2C5	0	19.5. 2017
"fish juveniles"	57	2016-02-16		armoring	1	2016-02-17	allintitle:"fish recruitment" OR YOY OR "young of the year" OR "young of year" OR "age 0" OR "fish juvenile" OR "fish larvae" OR "fish nursery" OR "0 group" OR "fish spawning" OR "fish reproduction" OR "CPUE" OR "0+fish" armoring	0	different versions of the word tried and have not had any results	https://scholar.google.se/scholar?q=allintitle%3A%22fish+recruitment%22+OR+YOY+OR+%22young+of+the+year%22+OR+%22young+of+year%22+OR+%22age+0%22+OR+%22fish+juvenile%22+OR+%22fish+larvae%22+OR+%22fish+nursery%22+OR+%220+group%22+OR+%22fish+spawning%22+OR+%22fish+reproduction%22+OR+%22CPUE%22+OR+%220%2Bfish%22+armoring&btnG=&hl=en&as_sdt=0%2C5	1	19.5. 2017
				"beam trawl"	3	2016-02-17	allintitle:"fish recruitment" OR YOY OR "young of the year" OR "young of year" OR "age 0" OR "fish juvenile" OR "fish larvae" OR "fish nursery" OR "0 group" OR "fish spawning" OR "fish reproduction" OR "CPUE" OR "0+fish" "beam trawl"	3	no results with "beam trawling"	https://scholar.google.se/scholar?q=allintitle%3A%22fish+recruitment%22+OR+YOY+OR+%22young+of+the+year%22+OR+%22young+of+year%22+OR+%22age+0%22+OR+%22fish+juvenile%22+OR+%22fish+larvae%22+OR+%22fish+nursery%22+OR+%220+group%22+OR+%22fish+spawning%22+OR+%22fish+reproduction%22+OR+%22CPUE%22+OR+%220%2Bfish%22+%22beam+trawl%22&btnG=&hl=en&as_sdt=0%2C5	0	19.5. 2017
				cable	1	2016-02-17	allintitle:"fish recruitment" OR YOY OR "young of the year" OR "young of year" OR "age 0" OR "fish juvenile" OR "fish larvae" OR "fish nursery" OR "0 group" OR "fish spawning" OR "fish reproduction" OR "CPUE" OR "0+fish" cable	0		https://scholar.google.se/scholar?q=allintitle%3A%22fish+recruitment%22+OR+YOY+OR+%22young+of+the+year%22+OR+%22young+of+year%22+OR+%22age+0%22+OR+%22fish+juvenile%22+OR+%22fish+larvae%22+OR+%22fish+nursery%22+OR+%220+group%22+OR+%22fish+spawning%22+OR+%22fish+reproduction%22+OR+%22CPUE%22+OR+%220%2Bfish%22+cable&btnG=&hl=en&as_sdt=0%2C5	0	19.5. 2017
				dock	0	2016-02-17	allintitle:"fish recruitment" OR YOY OR "young of the year" OR "young of year" OR "age 0" OR "fish juvenile" OR "fish larvae" OR "fish nursery" OR "0 group" OR "fish spawning" OR "fish reproduction" OR "CPUE" OR "0+fish" dock	NO			0	19.5. 2017
				drainage	16	2016-02-17	allintitle:"fish recruitment" OR YOY OR "young of the year" OR "young of year" OR "age 0" OR "fish juvenile" OR "fish larvae" OR "fish nursery" OR "0 group" OR "fish spawning" OR "fish reproduction" OR "CPUE" OR "0+fish" drainage	9		https://scholar.google.se/scholar?q=allintitle%3A%22fish+recruitment%22+OR+YOY+OR+%22young+of+the+year%22+OR+%22young+of+year%22+OR+%22age+0%22+OR+%22fish+juvenile%22+OR+%22fish+larvae%22+OR+%22fish+nursery%22+OR+%220+group%22+OR+%22fish+spawning%22+OR+%22fish+reproduction%22+OR+%22CPUE%22+OR+%220%2Bfish%22+drainage&btnG=&hl=en&as_sdt=0%2C5	0	19.5. 2017
				dredging	1	2016-02-17	allintitle:"fish recruitment" OR YOY OR "young of the year" OR "young of year" OR "age 0" OR "fish juvenile" OR "fish larvae" OR "fish nursery" OR "0 group" OR "fish spawning" OR "fish reproduction" OR "CPUE" OR "0+fish" dredging	1		https://scholar.google.se/scholar?q=allintitle%3A%22fish+recruitment%22+OR+YOY+OR+%22young+of+the+year%22+OR+%22young+of+year%22+OR+%22age+0%22+OR+%22fish+juvenile%22+OR+%22fish+larvae%22+OR+%22fish+nursery%22+OR+%220+group%22+OR+%22fish+spawning%22+OR+%22fish+reproduction%22+OR+%22CPUE%22+OR+%220%2Bfish%22+dredging&btnG=&hl=en&as_sdt=0%2C5	0	19.5. 2017
				pier	2	2016-02-17	allintitle:"fish recruitment" OR YOY OR "young of the year" OR "young of year" OR "age 0" OR "fish juvenile" OR "fish larvae" OR "fish nursery" OR "0 group" OR "fish spawning" OR "fish reproduction" OR "CPUE" OR "0+fish" pier	2		https://scholar.google.se/scholar?q=allintitle%3A%22fish+recruitment%22+OR+YOY+OR+%22young+of+the+year%22+OR+%22young+of+year%22+OR+%22age+0%22+OR+%22fish+juvenile%22+OR+%22fish+larvae%22+OR+%22fish+nursery%22+OR+%220+group%22+OR+%22fish+spawning%22+OR+%22fish+reproduction%22+OR+%22CPUE%22+OR+%220%2Bfish%22+pier&btnG=&hl=en&as_sdt=0%2C5	0	19.5. 2017
				pipe	0	2016-02-17	allintitle:"fish recruitment" OR YOY OR "young of the year" OR "young of year" OR "age 0" OR "fish juvenile" OR "fish larvae" OR "fish nursery" OR "0 group" OR "fish spawning" OR "fish reproduction" OR "CPUE" OR "0+fish" pipe	NO			0	19.5. 2017
				port	16	2016-02-17	allintitle:"fish recruitment" OR YOY OR "young of the year" OR "young of year" OR "age 0" OR "fish juvenile" OR "fish larvae" OR "fish nursery" OR "0 group" OR "fish spawning" OR "fish reproduction" OR "CPUE" OR "0+fish" port	12		https://scholar.google.se/scholar?q=allintitle%3A%22fish+recruitment%22+OR+YOY+OR+%22young+of+the+year%22+OR+%22young+of+year%22+OR+%22age+0%22+OR+%22fish+juvenile%22+OR+%22fish+larvae%22+OR+%22fish+nursery%22+OR+%220+group%22+OR+%22fish+spawning%22+OR+%22fish+reproduction%22+OR+%22CPUE%22+OR+%220%2Bfish%22+port&btnG=&hl=en&as_sdt=0%2C5	1	19.5. 2017
				"wind farm"	0	2016-02-17	allintitle:"fish recruitment" OR YOY OR "young of the year" OR "young of year" OR "age 0" OR "fish juvenile" OR "fish larvae" OR "fish nursery" OR "0 group" OR "fish spawning" OR "fish reproduction" OR "CPUE" OR "0+fish" "wind farm"	NO			0	19.5. 2017
				"wind turbine"	0	2016-02-17	allintitle:"fish recruitment" OR YOY OR "young of the year" OR "young of year" OR "age 0" OR "fish juvenile" OR "fish larvae" OR "fish nursery" OR "0 group" OR "fish spawning" OR "fish reproduction" OR "CPUE" OR "0+fish" "wind turbine"	NO			0	19.5. 2017
				"ship wreck"	0	2016-02-17	allintitle:"fish recruitment" OR YOY OR "young of the year" OR "young of year" OR "age 0" OR "fish juvenile" OR "fish larvae" OR "fish nursery" OR "0 group" OR "fish spawning" OR "fish reproduction" OR "CPUE" OR "0+fish" ship wreck				0	19.5. 2017
				"sea wall"	0	2016-02-17	allintitle:"fish recruitment" OR YOY OR "young of the year" OR "young of year" OR "age 0" OR "fish juvenile" OR "fish larvae" OR "fish nursery" OR "0 group" OR "fish spawning" OR "fish reproduction" OR "CPUE" OR "0+fish" "sea wall"	NO			0	19.5. 2017
				"coastal defenence"	0	2016-02-17	allintitle:"fish recruitment" OR YOY OR "young of the year" OR "young of year" OR "age 0" OR "fish juvenile" OR "fish larvae" OR "fish nursery" OR "0 group" OR "fish spawning" OR "fish reproduction" OR "CPUE" OR "0+fish" "coastal defence"	NO			0	19.5. 2017
				breakwaters	0	2016-02-17	allintitle:"fish recruitment" OR YOY OR "young of the year" OR "young of year" OR "age 0" OR "fish juvenile" OR "fish larvae" OR "fish nursery" OR "0 group" OR "fish spawning" OR "fish reproduction" OR "CPUE" OR "0+fish" breakwaters	NO			0	19.5. 2017
				buoy/s	0	2016-02-17	allintitle:"fish recruitment" OR YOY OR "young of the year" OR "young of year" OR "age 0" OR "fish juvenile" OR "fish larvae" OR "fish nursery" OR "0 group" OR "fish spawning" OR "fish reproduction" OR "CPUE" OR "0+fish" buoy	NO			0	19.5. 2017
				gabion/s	0	2016-02-17	allintitle:"fish recruitment" OR YOY OR "young of the year" OR "young of year" OR "age 0" OR "fish juvenile" OR "fish larvae" OR "fish nursery" OR "0 group" OR "fish spawning" OR "fish reproduction" OR "CPUE" OR "0+fish" gabion	NO			0	19.5. 2017
				“beach nourishment”	0	2016-02-17	allintitle:"fish recruitment" OR YOY OR "young of the year" OR "young of year" OR "age 0" OR "fish juvenile" OR "fish larvae" OR "fish nursery" OR "0 group" OR "fish spawning" OR "fish reproduction" OR "CPUE" OR "0+fish" “beach nourishment”	NO			0	19.5. 2017
				"landing stage"	0	2016-02-17	allintitle:"fish recruitment" OR YOY OR "young of the year" OR "young of year" OR "age 0" OR "fish juvenile" OR "fish larvae" OR "fish nursery" OR "0 group" OR "fish spawning" OR "fish reproduction" OR "CPUE" OR "0+fish" "landing stage"	NO			0	19.5. 2017
				groyne/s	0	2016-02-17	allintitle:"fish recruitment" OR YOY OR "young of the year" OR "young of year" OR "age 0" OR "fish juvenile" OR "fish larvae" OR "fish nursery" OR "0 group" OR "fish spawning" OR "fish reproduction" OR "CPUE" OR "0+fish" groyne	NO			0	19.5. 2017
				jetty/ies	0	2016-02-17	allintitle:"fish recruitment" OR YOY OR "young of the year" OR "young of year" OR "age 0" OR "fish juvenile" OR "fish larvae" OR "fish nursery" OR "0 group" OR "fish spawning" OR "fish reproduction" OR "CPUE" OR "0+fish" jetty	NO			0	19.5. 2017
				extraction	2	2016-02-17	allintitle:"fish recruitment" OR YOY OR "young of the year" OR "young of year" OR "age 0" OR "fish juvenile" OR "fish larvae" OR "fish nursery" OR "0 group" OR "fish spawning" OR "fish reproduction" OR "CPUE" OR "0+fish" extraction	2		https://scholar.google.se/scholar?q=allintitle%3A%22fish+recruitment%22+OR+YOY+OR+%22young+of+the+year%22+OR+%22young+of+year%22+OR+%22age+0%22+OR+%22fish+juvenile%22+OR+%22fish+larvae%22+OR+%22fish+nursery%22+OR+%220+group%22+OR+%22fish+spawning%22+OR+%22fish+reproduction%22+OR+%22CPUE%22+OR+%220%2Bfish%22+extraction&btnG=&hl=en&as_sdt=0%2C5	0	19.5. 2017
				revetment/s	0	2016-02-17	allintitle:"fish recruitment" OR YOY OR "young of the year" OR "young of year" OR "age 0" OR "fish juvenile" OR "fish larvae" OR "fish nursery" OR "0 group" OR "fish spawning" OR "fish reproduction" OR "CPUE" OR "0+fish" revetment	NO			0	19.5. 2017
				engineering	10	2016-02-17	allintitle:"fish recruitment" OR YOY OR "young of the year" OR "young of year" OR "age 0" OR "fish juvenile" OR "fish larvae" OR "fish nursery" OR "0 group" OR "fish spawning" OR "fish reproduction" OR "CPUE" OR "0+fish" engineering	10		https://scholar.google.se/scholar?q=allintitle%3A%22fish+recruitment%22+OR+YOY+OR+%22young+of+the+year%22+OR+%22young+of+year%22+OR+%22age+0%22+OR+%22fish+juvenile%22+OR+%22fish+larvae%22+OR+%22fish+nursery%22+OR+%220+group%22+OR+%22fish+spawning%22+OR+%22fish+reproduction%22+OR+%22CPUE%22+OR+%220%2Bfish%22+engineering&btnG=&hl=en&as_sdt=0%2C5	0	19.5. 2017
				mooring	0	2016-02-17	allintitle:"fish recruitment" OR YOY OR "young of the year" OR "young of year" OR "age 0" OR "fish juvenile" OR "fish larvae" OR "fish nursery" OR "0 group" OR "fish spawning" OR "fish reproduction" OR "CPUE" OR "0+fish" mooring	NO			0	19.5. 2017
				drilling/drills/drill	0	2016-02-17	allintitle:"fish recruitment" OR YOY OR "young of the year" OR "young of year" OR "age 0" OR "fish juvenile" OR "fish larvae" OR "fish nursery" OR "0 group" OR "fish spawning" OR "fish reproduction" OR "CPUE" OR "0+fish" drilling	NO			0	19.5. 2017
				"flood gate"	0	2016-02-17	allintitle:"fish recruitment" OR YOY OR "young of the year" OR "young of year" OR "age 0" OR "fish juvenile" OR "fish larvae" OR "fish nursery" OR "0 group" OR "fish spawning" OR "fish reproduction" OR "CPUE" OR "0+fish" "flood gate"	NO			0	19.5. 2017
				floodgate	0	2016-02-17	allintitle:"fish recruitment" OR YOY OR "young of the year" OR "young of year" OR "age 0" OR "fish juvenile" OR "fish larvae" OR "fish nursery" OR "0 group" OR "fish spawning" OR "fish reproduction" OR "CPUE" OR "0+fish" floodgate	NO			0	19.5. 2017
				dike/s	0	2016-02-17	allintitle:"fish recruitment" OR YOY OR "young of the year" OR "young of year" OR "age 0" OR "fish juvenile" OR "fish larvae" OR "fish nursery" OR "0 group" OR "fish spawning" OR "fish reproduction" OR "CPUE" OR "0+fish" dike	NO			0	19.5. 2017
				ship	2	2016-02-17	allintitle:"fish recruitment" OR YOY OR "young of the year" OR "young of year" OR "age 0" OR "fish juvenile" OR "fish larvae" OR "fish nursery" OR "0 group" OR "fish spawning" OR "fish reproduction" OR "CPUE" OR "0+fish" ship	2		https://scholar.google.se/scholar?q=allintitle%3A%22fish+recruitment%22+OR+YOY+OR+%22young+of+the+year%22+OR+%22young+of+year%22+OR+%22age+0%22+OR+%22fish+juvenile%22+OR+%22fish+larvae%22+OR+%22fish+nursery%22+OR+%220+group%22+OR+%22fish+spawning%22+OR+%22fish+reproduction%22+OR+%22CPUE%22+OR+%220%2Bfish%22+ship&btnG=&hl=en&as_sdt=0%2C5	0	19.5. 2017
				ships	1	2016-02-17	allintitle:"fish recruitment" OR YOY OR "young of the year" OR "young of year" OR "age 0" OR "fish juvenile" OR "fish larvae" OR "fish nursery" OR "0 group" OR "fish spawning" OR "fish reproduction" OR "CPUE" OR "0+fish" ships	1		https://scholar.google.se/scholar?q=allintitle%3A%22fish+recruitment%22+OR+YOY+OR+%22young+of+the+year%22+OR+%22young+of+year%22+OR+%22age+0%22+OR+%22fish+juvenile%22+OR+%22fish+larvae%22+OR+%22fish+nursery%22+OR+%220+group%22+OR+%22fish+spawning%22+OR+%22fish+reproduction%22+OR+%22CPUE%22+OR+%220%2Bfish%22+ships&btnG=&hl=en&as_sdt=0%2C5	0	19.5. 2017
				tide	8	2016-02-17	allintitle:"fish recruitment" OR YOY OR "young of the year" OR "young of year" OR "age 0" OR "fish juvenile" OR "fish larvae" OR "fish nursery" OR "0 group" OR "fish spawning" OR "fish reproduction" OR "CPUE" OR "0+fish" tide	8		https://scholar.google.se/scholar?q=allintitle%3A%22fish+recruitment%22+OR+YOY+OR+%22young+of+the+year%22+OR+%22young+of+year%22+OR+%22age+0%22+OR+%22fish+juvenile%22+OR+%22fish+larvae%22+OR+%22fish+nursery%22+OR+%220+group%22+OR+%22fish+spawning%22+OR+%22fish+reproduction%22+OR+%22CPUE%22+OR+%220%2Bfish%22+tide&btnG=&hl=en&as_sdt=0%2C5	0	19.5. 2017
				tidal	28	2016-02-17	allintitle:"fish recruitment" OR YOY OR "young of the year" OR "young of year" OR "age 0" OR "fish juvenile" OR "fish larvae" OR "fish nursery" OR "0 group" OR "fish spawning" OR "fish reproduction" OR "CPUE" OR "0+fish" tidal	26		https://scholar.google.se/scholar?q=allintitle%3A%22fish+recruitment%22+OR+YOY+OR+%22young+of+the+year%22+OR+%22young+of+year%22+OR+%22age+0%22+OR+%22fish+juvenile%22+OR+%22fish+larvae%22+OR+%22fish+nursery%22+OR+%220+group%22+OR+%22fish+spawning%22+OR+%22fish+reproduction%22+OR+%22CPUE%22+OR+%220%2Bfish%22+tidal&btnG=&hl=en&as_sdt=0%2C5	3	19.5. 2017
				wave	3	2016-02-17	allintitle:"fish recruitment" OR YOY OR "young of the year" OR "young of year" OR "age 0" OR "fish juvenile" OR "fish larvae" OR "fish nursery" OR "0 group" OR "fish spawning" OR "fish reproduction" OR "CPUE" OR "0+fish" wave	2		https://scholar.google.se/scholar?q=allintitle%3A%22fish+recruitment%22+OR+YOY+OR+%22young+of+the+year%22+OR+%22young+of+year%22+OR+%22age+0%22+OR+%22fish+juvenile%22+OR+%22fish+larvae%22+OR+%22fish+nursery%22+OR+%220+group%22+OR+%22fish+spawning%22+OR+%22fish+reproduction%22+OR+%22CPUE%22+OR+%220%2Bfish%22+wave&btnG=&hl=en&as_sdt=0%2C5	0	19.5. 2017
				waves	1	2016-02-17	allintitle:"fish recruitment" OR YOY OR "young of the year" OR "young of year" OR "age 0" OR "fish juvenile" OR "fish larvae" OR "fish nursery" OR "0 group" OR "fish spawning" OR "fish reproduction" OR "CPUE" OR "0+fish" waves	0		https://scholar.google.se/scholar?q=allintitle%3A%22fish+recruitment%22+OR+YOY+OR+%22young+of+the+year%22+OR+%22young+of+year%22+OR+%22age+0%22+OR+%22fish+juvenile%22+OR+%22fish+larvae%22+OR+%22fish+nursery%22+OR+%220+group%22+OR+%22fish+spawning%22+OR+%22fish+reproduction%22+OR+%22CPUE%22+OR+%220%2Bfish%22+waves&btnG=&hl=en&as_sdt=0%2C5	0	19.5. 2017
				TOTAL	672			603	607 in total		72

## Sheet: GS_Danish
4b. Google Scholar searches in Danish
[limited to one ‘phrase’ (i.e. enclosed in double quotation marks), one ‘OR’ substring, and 256 characters]
[including patents and citations]
[Note:Could not limit to Danish only, results include english hits too. The serch was perfromed only once in May 2017]
English	Danish - intervention search terms	Number of Results	Date	Outcome string	Full search string	Downloaded
OUTCOME SEARCH STRING ONLY	NA	91000	26.5.2017	allintitle:"fiske rekruttering" OR YOY OR "årets ungfisk" OR "alder 0" OR "juvenile" OR "fiskelarver" OR "fiske opvækstområder" OR "0 gruppe" OR "fisk gydning" OR "Fisk reproduktion" OR "CPUE" OR "0+fisk" OR " fiskeyngel"	allintitle:"fiske rekruttering" OR YOY OR "årets ungfisk" OR "alder 0" OR "juvenile" OR "fiskelarver" OR "fiske opvækstområder" OR "0 gruppe" OR "fisk gydning" OR "Fisk reproduktion" OR "CPUE" OR "0+fisk" OR " fiskeyngel"	0
habitat	levesteder	0	26.5.2017	allintitle:"fiske rekruttering" OR YOY OR "årets ungfisk" OR "alder 0" OR "juvenile" OR "fiskelarver" OR "fiske opvækstområder" OR "0 gruppe" OR "fisk gydning" OR "Fisk reproduktion" OR "CPUE" OR "0+fisk" OR " fiskeyngel"	allintitle:"fiske rekruttering" OR YOY OR "årets ungfisk" OR "alder 0" OR "juvenile" OR "fiskelarver" OR "fiske opvækstområder" OR "0 gruppe" OR "fisk gydning" OR "Fisk reproduktion" OR "CPUE" OR "0+fisk" OR " fiskeyngel" levesteder	0
	habitater	2	26.5.2017	allintitle:"fiske rekruttering" OR YOY OR "årets ungfisk" OR "alder 0" OR "juvenile" OR "fiskelarver" OR "fiske opvækstområder" OR "0 gruppe" OR "fisk gydning" OR "Fisk reproduktion" OR "CPUE" OR "0+fisk" OR " fiskeyngel"	allintitle:"fiske rekruttering" OR YOY OR "årets ungfisk" OR "alder 0" OR "juvenile" OR "fiskelarver" OR "fiske opvækstområder" OR "0 gruppe" OR "fisk gydning" OR "Fisk reproduktion" OR "CPUE" OR "0+fisk" OR " fiskeyngel" habitater	2
man-made/anthropogenic	menneskeskabte	0	26.5.2017	allintitle:"fiske rekruttering" OR YOY OR "årets ungfisk" OR "alder 0" OR "juvenile" OR "fiskelarver" OR "fiske opvækstområder" OR "0 gruppe" OR "fisk gydning" OR "Fisk reproduktion" OR "CPUE" OR "0+fisk" OR " fiskeyngel"	allintitle:"fiske rekruttering" OR YOY OR "årets ungfisk" OR "alder 0" OR "juvenile" OR "fiskelarver" OR "fiske opvækstområder" OR "0 gruppe" OR "fisk gydning" OR "Fisk reproduktion" OR "CPUE" OR "0+fisk" OR " fiskeyngel" menneskeskabte
change	Skift	0	26.5.2017	allintitle:"fiske rekruttering" OR YOY OR "årets ungfisk" OR "alder 0" OR "juvenile" OR "fiskelarver" OR "fiske opvækstområder" OR "0 gruppe" OR "fisk gydning" OR "Fisk reproduktion" OR "CPUE" OR "0+fisk" OR " fiskeyngel"	allintitle:"fiske rekruttering" OR YOY OR "årets ungfisk" OR "alder 0" OR "juvenile" OR "fiskelarver" OR "fiske opvækstområder" OR "0 gruppe" OR "fisk gydning" OR "Fisk reproduktion" OR "CPUE" OR "0+fisk" OR " fiskeyngel" Skift
complexity	kompleksitet	0	26.5.2017	allintitle:"fiske rekruttering" OR YOY OR "årets ungfisk" OR "alder 0" OR "juvenile" OR "fiskelarver" OR "fiske opvækstområder" OR "0 gruppe" OR "fisk gydning" OR "Fisk reproduktion" OR "CPUE" OR "0+fisk" OR " fiskeyngel"	allintitle:"fiske rekruttering" OR YOY OR "årets ungfisk" OR "alder 0" OR "juvenile" OR "fiskelarver" OR "fiske opvækstområder" OR "0 gruppe" OR "fisk gydning" OR "Fisk reproduktion" OR "CPUE" OR "0+fisk" OR " fiskeyngel" kompleksitet
enhancement	ophjælpning	0	26.5.2017	allintitle:"fiske rekruttering" OR YOY OR "årets ungfisk" OR "alder 0" OR "juvenile" OR "fiskelarver" OR "fiske opvækstområder" OR "0 gruppe" OR "fisk gydning" OR "Fisk reproduktion" OR "CPUE" OR "0+fisk" OR " fiskeyngel"	allintitle:"fiske rekruttering" OR YOY OR "årets ungfisk" OR "alder 0" OR "juvenile" OR "fiskelarver" OR "fiske opvækstområder" OR "0 gruppe" OR "fisk gydning" OR "Fisk reproduktion" OR "CPUE" OR "0+fisk" OR " fiskeyngel" ophjælpning
connectivity	tilslutningsmuligheder	0	26.5.2017	allintitle:"fiske rekruttering" OR YOY OR "årets ungfisk" OR "alder 0" OR "juvenile" OR "fiskelarver" OR "fiske opvækstområder" OR "0 gruppe" OR "fisk gydning" OR "Fisk reproduktion" OR "CPUE" OR "0+fisk" OR " fiskeyngel"	allintitle:"fiske rekruttering" OR YOY OR "årets ungfisk" OR "alder 0" OR "juvenile" OR "fiskelarver" OR "fiske opvækstområder" OR "0 gruppe" OR "fisk gydning" OR "Fisk reproduktion" OR "CPUE" OR "0+fisk" OR " fiskeyngel" tilslutningsmuligheder
fragmentation	fragmentering	0	26.5.2017	allintitle:"fiske rekruttering" OR YOY OR "årets ungfisk" OR "alder 0" OR "juvenile" OR "fiskelarver" OR "fiske opvækstområder" OR "0 gruppe" OR "fisk gydning" OR "Fisk reproduktion" OR "CPUE" OR "0+fisk" OR " fiskeyngel"	allintitle:"fiske rekruttering" OR YOY OR "årets ungfisk" OR "alder 0" OR "juvenile" OR "fiskelarver" OR "fiske opvækstområder" OR "0 gruppe" OR "fisk gydning" OR "Fisk reproduktion" OR "CPUE" OR "0+fisk" OR " fiskeyngel" fragmentering
artificial	Kunstig	0	26.5.2017	allintitle:"fiske rekruttering" OR YOY OR "årets ungfisk" OR "alder 0" OR "juvenile" OR "fiskelarver" OR "fiske opvækstområder" OR "0 gruppe" OR "fisk gydning" OR "Fisk reproduktion" OR "CPUE" OR "0+fisk" OR " fiskeyngel"	allintitle:"fiske rekruttering" OR YOY OR "årets ungfisk" OR "alder 0" OR "juvenile" OR "fiskelarver" OR "fiske opvækstområder" OR "0 gruppe" OR "fisk gydning" OR "Fisk reproduktion" OR "CPUE" OR "0+fisk" OR " fiskeyngel" Kunstig
degradation	nedbrydning	0	26.5.2017	allintitle:"fiske rekruttering" OR YOY OR "årets ungfisk" OR "alder 0" OR "juvenile" OR "fiskelarver" OR "fiske opvækstområder" OR "0 gruppe" OR "fisk gydning" OR "Fisk reproduktion" OR "CPUE" OR "0+fisk" OR " fiskeyngel"	allintitle:"fiske rekruttering" OR YOY OR "årets ungfisk" OR "alder 0" OR "juvenile" OR "fiskelarver" OR "fiske opvækstområder" OR "0 gruppe" OR "fisk gydning" OR "Fisk reproduktion" OR "CPUE" OR "0+fisk" OR " fiskeyngel" nedbrydning
loss	tab	0	26.5.2017	allintitle:"fiske rekruttering" OR YOY OR "årets ungfisk" OR "alder 0" OR "juvenile" OR "fiskelarver" OR "fiske opvækstområder" OR "0 gruppe" OR "fisk gydning" OR "Fisk reproduktion" OR "CPUE" OR "0+fisk" OR " fiskeyngel"	allintitle:"fiske rekruttering" OR YOY OR "årets ungfisk" OR "alder 0" OR "juvenile" OR "fiskelarver" OR "fiske opvækstområder" OR "0 gruppe" OR "fisk gydning" OR "Fisk reproduktion" OR "CPUE" OR "0+fisk" OR " fiskeyngel" tab
restoration	Restaurering	0	26.5.2017	allintitle:"fiske rekruttering" OR YOY OR "årets ungfisk" OR "alder 0" OR "juvenile" OR "fiskelarver" OR "fiske opvækstområder" OR "0 gruppe" OR "fisk gydning" OR "Fisk reproduktion" OR "CPUE" OR "0+fisk" OR " fiskeyngel"	allintitle:"fiske rekruttering" OR YOY OR "årets ungfisk" OR "alder 0" OR "juvenile" OR "fiskelarver" OR "fiske opvækstområder" OR "0 gruppe" OR "fisk gydning" OR "Fisk reproduktion" OR "CPUE" OR "0+fisk" OR " fiskeyngel" Restaurering
reclamation	indvinding	0	26.5.2017	allintitle:"fiske rekruttering" OR YOY OR "årets ungfisk" OR "alder 0" OR "juvenile" OR "fiskelarver" OR "fiske opvækstområder" OR "0 gruppe" OR "fisk gydning" OR "Fisk reproduktion" OR "CPUE" OR "0+fisk" OR " fiskeyngel"	allintitle:"fiske rekruttering" OR YOY OR "årets ungfisk" OR "alder 0" OR "juvenile" OR "fiskelarver" OR "fiske opvækstområder" OR "0 gruppe" OR "fisk gydning" OR "Fisk reproduktion" OR "CPUE" OR "0+fisk" OR " fiskeyngel" indvinding
armoring	armering	0	26.5.2017	allintitle:"fiske rekruttering" OR YOY OR "årets ungfisk" OR "alder 0" OR "juvenile" OR "fiskelarver" OR "fiske opvækstområder" OR "0 gruppe" OR "fisk gydning" OR "Fisk reproduktion" OR "CPUE" OR "0+fisk" OR " fiskeyngel"	allintitle:"fiske rekruttering" OR YOY OR "årets ungfisk" OR "alder 0" OR "juvenile" OR "fiskelarver" OR "fiske opvækstområder" OR "0 gruppe" OR "fisk gydning" OR "Fisk reproduktion" OR "CPUE" OR "0+fisk" OR " fiskeyngel" armering
"beam trawl"	bomtrawl	0	26.5.2017	allintitle:"fiske rekruttering" OR YOY OR "årets ungfisk" OR "alder 0" OR "juvenile" OR "fiskelarver" OR "fiske opvækstområder" OR "0 gruppe" OR "fisk gydning" OR "Fisk reproduktion" OR "CPUE" OR "0+fisk" OR " fiskeyngel"	allintitle:"fiske rekruttering" OR YOY OR "årets ungfisk" OR "alder 0" OR "juvenile" OR "fiskelarver" OR "fiske opvækstområder" OR "0 gruppe" OR "fisk gydning" OR "Fisk reproduktion" OR "CPUE" OR "0+fisk" OR " fiskeyngel" bomtrawl
cable	kabel	0	26.5.2017	allintitle:"fiske rekruttering" OR YOY OR "årets ungfisk" OR "alder 0" OR "juvenile" OR "fiskelarver" OR "fiske opvækstområder" OR "0 gruppe" OR "fisk gydning" OR "Fisk reproduktion" OR "CPUE" OR "0+fisk" OR " fiskeyngel"	allintitle:"fiske rekruttering" OR YOY OR "årets ungfisk" OR "alder 0" OR "juvenile" OR "fiskelarver" OR "fiske opvækstområder" OR "0 gruppe" OR "fisk gydning" OR "Fisk reproduktion" OR "CPUE" OR "0+fisk" OR " fiskeyngel" kabel
drainage	Afløb	0	26.5.2017	allintitle:"fiske rekruttering" OR YOY OR "årets ungfisk" OR "alder 0" OR "juvenile" OR "fiskelarver" OR "fiske opvækstområder" OR "0 gruppe" OR "fisk gydning" OR "Fisk reproduktion" OR "CPUE" OR "0+fisk" OR " fiskeyngel"	allintitle:"fiske rekruttering" OR YOY OR "årets ungfisk" OR "alder 0" OR "juvenile" OR "fiskelarver" OR "fiske opvækstområder" OR "0 gruppe" OR "fisk gydning" OR "Fisk reproduktion" OR "CPUE" OR "0+fisk" OR " fiskeyngel" Afløb
dredging	bundskrab	0	26.5.2017	allintitle:"fiske rekruttering" OR YOY OR "årets ungfisk" OR "alder 0" OR "juvenile" OR "fiskelarver" OR "fiske opvækstområder" OR "0 gruppe" OR "fisk gydning" OR "Fisk reproduktion" OR "CPUE" OR "0+fisk" OR " fiskeyngel"	allintitle:"fiske rekruttering" OR YOY OR "årets ungfisk" OR "alder 0" OR "juvenile" OR "fiskelarver" OR "fiske opvækstområder" OR "0 gruppe" OR "fisk gydning" OR "Fisk reproduktion" OR "CPUE" OR "0+fisk" OR " fiskeyngel" bundskrab
pier	mole	4	26.5.2017	allintitle:"fiske rekruttering" OR YOY OR "årets ungfisk" OR "alder 0" OR "juvenile" OR "fiskelarver" OR "fiske opvækstområder" OR "0 gruppe" OR "fisk gydning" OR "Fisk reproduktion" OR "CPUE" OR "0+fisk" OR " fiskeyngel"	allintitle:"fiske rekruttering" OR YOY OR "årets ungfisk" OR "alder 0" OR "juvenile" OR "fiskelarver" OR "fiske opvækstområder" OR "0 gruppe" OR "fisk gydning" OR "Fisk reproduktion" OR "CPUE" OR "0+fisk" OR " fiskeyngel" mole	4
port	port	64	26.5.2017	allintitle:"fiske rekruttering" OR YOY OR "årets ungfisk" OR "alder 0" OR "juvenile" OR "fiskelarver" OR "fiske opvækstområder" OR "0 gruppe" OR "fisk gydning" OR "Fisk reproduktion" OR "CPUE" OR "0+fisk" OR " fiskeyngel"	allintitle:"fiske rekruttering" OR YOY OR "årets ungfisk" OR "alder 0" OR "juvenile" OR "fiskelarver" OR "fiske opvækstområder" OR "0 gruppe" OR "fisk gydning" OR "Fisk reproduktion" OR "CPUE" OR "0+fisk" OR " fiskeyngel" port	63
extraction	udvinding	0	26.5.2017	allintitle:"fiske rekruttering" OR YOY OR "årets ungfisk" OR "alder 0" OR "juvenile" OR "fiskelarver" OR "fiske opvækstområder" OR "0 gruppe" OR "fisk gydning" OR "Fisk reproduktion" OR "CPUE" OR "0+fisk" OR " fiskeyngel"	allintitle:"fiske rekruttering" OR YOY OR "årets ungfisk" OR "alder 0" OR "juvenile" OR "fiskelarver" OR "fiske opvækstområder" OR "0 gruppe" OR "fisk gydning" OR "Fisk reproduktion" OR "CPUE" OR "0+fisk" OR " fiskeyngel" udvinding
engineering	konstruktion	0	26.5.2017	allintitle:"fiske rekruttering" OR YOY OR "årets ungfisk" OR "alder 0" OR "juvenile" OR "fiskelarver" OR "fiske opvækstområder" OR "0 gruppe" OR "fisk gydning" OR "Fisk reproduktion" OR "CPUE" OR "0+fisk" OR " fiskeyngel"	allintitle:"fiske rekruttering" OR YOY OR "årets ungfisk" OR "alder 0" OR "juvenile" OR "fiskelarver" OR "fiske opvækstområder" OR "0 gruppe" OR "fisk gydning" OR "Fisk reproduktion" OR "CPUE" OR "0+fisk" OR " fiskeyngel" konstruktion
ship	skib	0	26.5.2017	allintitle:"fiske rekruttering" OR YOY OR "årets ungfisk" OR "alder 0" OR "juvenile" OR "fiskelarver" OR "fiske opvækstområder" OR "0 gruppe" OR "fisk gydning" OR "Fisk reproduktion" OR "CPUE" OR "0+fisk" OR " fiskeyngel"	allintitle:"fiske rekruttering" OR YOY OR "årets ungfisk" OR "alder 0" OR "juvenile" OR "fiskelarver" OR "fiske opvækstområder" OR "0 gruppe" OR "fisk gydning" OR "Fisk reproduktion" OR "CPUE" OR "0+fisk" OR " fiskeyngel" skib
ships	Skibe	0	26.5.2017	allintitle:"fiske rekruttering" OR YOY OR "årets ungfisk" OR "alder 0" OR "juvenile" OR "fiskelarver" OR "fiske opvækstområder" OR "0 gruppe" OR "fisk gydning" OR "Fisk reproduktion" OR "CPUE" OR "0+fisk" OR " fiskeyngel"	allintitle:"fiske rekruttering" OR YOY OR "årets ungfisk" OR "alder 0" OR "juvenile" OR "fiskelarver" OR "fiske opvækstområder" OR "0 gruppe" OR "fisk gydning" OR "Fisk reproduktion" OR "CPUE" OR "0+fisk" OR " fiskeyngel" Skibe
tide	tidevand	0	26.5.2017	allintitle:"fiske rekruttering" OR YOY OR "årets ungfisk" OR "alder 0" OR "juvenile" OR "fiskelarver" OR "fiske opvækstområder" OR "0 gruppe" OR "fisk gydning" OR "Fisk reproduktion" OR "CPUE" OR "0+fisk" OR " fiskeyngel"	allintitle:"fiske rekruttering" OR YOY OR "årets ungfisk" OR "alder 0" OR "juvenile" OR "fiskelarver" OR "fiske opvækstområder" OR "0 gruppe" OR "fisk gydning" OR "Fisk reproduktion" OR "CPUE" OR "0+fisk" OR " fiskeyngel" tidevand
tidal	tidevands	0	26.5.2017	allintitle:"fiske rekruttering" OR YOY OR "årets ungfisk" OR "alder 0" OR "juvenile" OR "fiskelarver" OR "fiske opvækstområder" OR "0 gruppe" OR "fisk gydning" OR "Fisk reproduktion" OR "CPUE" OR "0+fisk" OR " fiskeyngel"	allintitle:"fiske rekruttering" OR YOY OR "årets ungfisk" OR "alder 0" OR "juvenile" OR "fiskelarver" OR "fiske opvækstområder" OR "0 gruppe" OR "fisk gydning" OR "Fisk reproduktion" OR "CPUE" OR "0+fisk" OR " fiskeyngel" tidevands
wave	bølge	0	26.5.2017	allintitle:"fiske rekruttering" OR YOY OR "årets ungfisk" OR "alder 0" OR "juvenile" OR "fiskelarver" OR "fiske opvækstområder" OR "0 gruppe" OR "fisk gydning" OR "Fisk reproduktion" OR "CPUE" OR "0+fisk" OR " fiskeyngel"	allintitle:"fiske rekruttering" OR YOY OR "årets ungfisk" OR "alder 0" OR "juvenile" OR "fiskelarver" OR "fiske opvækstområder" OR "0 gruppe" OR "fisk gydning" OR "Fisk reproduktion" OR "CPUE" OR "0+fisk" OR " fiskeyngel" bølge
waves	bølger	0	26.5.2017	allintitle:"fiske rekruttering" OR YOY OR "årets ungfisk" OR "alder 0" OR "juvenile" OR "fiskelarver" OR "fiske opvækstområder" OR "0 gruppe" OR "fisk gydning" OR "Fisk reproduktion" OR "CPUE" OR "0+fisk" OR " fiskeyngel"	allintitle:"fiske rekruttering" OR YOY OR "årets ungfisk" OR "alder 0" OR "juvenile" OR "fiskelarver" OR "fiske opvækstområder" OR "0 gruppe" OR "fisk gydning" OR "Fisk reproduktion" OR "CPUE" OR "0+fisk" OR " fiskeyngel" bølger
	sammenhængende	0	26.5.2017	allintitle:"fiske rekruttering" OR YOY OR "årets ungfisk" OR "alder 0" OR "juvenile" OR "fiskelarver" OR "fiske opvækstområder" OR "0 gruppe" OR "fisk gydning" OR "Fisk reproduktion" OR "CPUE" OR "0+fisk" OR " fiskeyngel"	allintitle:"fiske rekruttering" OR YOY OR "årets ungfisk" OR "alder 0" OR "juvenile" OR "fiskelarver" OR "fiske opvækstområder" OR "0 gruppe" OR "fisk gydning" OR "Fisk reproduktion" OR "CPUE" OR "0+fisk" OR " fiskeyngel" sammenhængende
	netværk	0	26.5.2017	allintitle:"fiske rekruttering" OR YOY OR "årets ungfisk" OR "alder 0" OR "juvenile" OR "fiskelarver" OR "fiske opvækstområder" OR "0 gruppe" OR "fisk gydning" OR "Fisk reproduktion" OR "CPUE" OR "0+fisk" OR " fiskeyngel"	allintitle:"fiske rekruttering" OR YOY OR "årets ungfisk" OR "alder 0" OR "juvenile" OR "fiskelarver" OR "fiske opvækstområder" OR "0 gruppe" OR "fisk gydning" OR "Fisk reproduktion" OR "CPUE" OR "0+fisk" OR " fiskeyngel" netværk
	skabe	0	26.5.2017	allintitle:"fiske rekruttering" OR YOY OR "årets ungfisk" OR "alder 0" OR "juvenile" OR "fiskelarver" OR "fiske opvækstområder" OR "0 gruppe" OR "fisk gydning" OR "Fisk reproduktion" OR "CPUE" OR "0+fisk" OR " fiskeyngel"	allintitle:"fiske rekruttering" OR YOY OR "årets ungfisk" OR "alder 0" OR "juvenile" OR "fiskelarver" OR "fiske opvækstområder" OR "0 gruppe" OR "fisk gydning" OR "Fisk reproduktion" OR "CPUE" OR "0+fisk" OR " fiskeyngel" skabe
	bygge	0	26.5.2017	allintitle:"fiske rekruttering" OR YOY OR "årets ungfisk" OR "alder 0" OR "juvenile" OR "fiskelarver" OR "fiske opvækstområder" OR "0 gruppe" OR "fisk gydning" OR "Fisk reproduktion" OR "CPUE" OR "0+fisk" OR " fiskeyngel"	allintitle:"fiske rekruttering" OR YOY OR "årets ungfisk" OR "alder 0" OR "juvenile" OR "fiskelarver" OR "fiske opvækstområder" OR "0 gruppe" OR "fisk gydning" OR "Fisk reproduktion" OR "CPUE" OR "0+fisk" OR " fiskeyngel" bygge
	konstruere	0	26.5.2017	allintitle:"fiske rekruttering" OR YOY OR "årets ungfisk" OR "alder 0" OR "juvenile" OR "fiskelarver" OR "fiske opvækstområder" OR "0 gruppe" OR "fisk gydning" OR "Fisk reproduktion" OR "CPUE" OR "0+fisk" OR " fiskeyngel"	allintitle:"fiske rekruttering" OR YOY OR "årets ungfisk" OR "alder 0" OR "juvenile" OR "fiskelarver" OR "fiske opvækstområder" OR "0 gruppe" OR "fisk gydning" OR "Fisk reproduktion" OR "CPUE" OR "0+fisk" OR " fiskeyngel" konstruere
					TOTAL	69

## Sheet: GS_Dutch
4c. Google Scholar searches in Dutch
[limited to one ‘phrase’ (i.e. enclosed in double quotation marks), one ‘OR’ substring, and 256 characters]
[including patents and citations]
Varying numbers of terms were used because of the presence/absence of synonyms across the different languages.
[Note: Google Scholar set to perform only Dutch searches]
English	Dutch - intervention search terms	Number of Results	Date	Full search string	Downloaded	Note	UPDATE	Update - date
OUTCOME SEARCH STRING ONLY	NA	35	2016-04-27	allintitle:"Vis recruitment" OR YOY OR "Young van het jaar" OR " Leeftijd 0" OR "Vis juveniele" OR "vislarven" OR "vis kwekerij" OR "0 group" OR "kraamkamer" OR "paaien van vissen" OR "Vis reproductie" OR "CPUE" OR "0+fish"	35		48	27-06-2017
habitat	habitat	1	2016-04-27	allintitle:"Vis recruitment" OR YOY OR "Young van het jaar" OR " Leeftijd 0" OR "Vis juveniele" OR "vislarven" OR "vis kwekerij" OR "0 group" OR "kraamkamer" OR "paaien van vissen" OR "Vis reproductie" OR "CPUE" OR "0+fish" habitat	0	Duplicate	1	27-06-2017
	leefgebied	0	2016-04-27	allintitle:"Vis recruitment" OR YOY OR "Young van het jaar" OR " Leeftijd 0" OR "Vis juveniele" OR "vislarven" OR "vis kwekerij" OR "0 group" OR "kraamkamer" OR "paaien van vissen" OR "Vis reproductie" OR "CPUE" OR "0+fish" leefgebied	0		0	27-06-2017
man-made	Door de mens gemaakt	0	2016-04-27	allintitle: "Vis recruitment" OR YOY OR "Young van het jaar" OR "Leeftijd 0" OR "Vis juveniele" OR vislarven OR "vis kwekerij" OR "0 group" OR kraamkamer OR "paaien van vissen" OR "Vis reproductie" OR CPUE OR "0 fish" "door de mens gemaakt"	0		0	27-06-2017
anthropogenic	antropogeen	0	2016-04-27	allintitle: "Vis recruitment" OR YOY OR "Young van het jaar" OR "Leeftijd 0" OR "Vis juveniele" OR vislarven OR "vis kwekerij" OR "0 group" OR kraamkamer OR "paaien van vissen" OR "Vis reproductie" OR CPUE OR "0 fish" antropogeen	0		0	27-06-2017
change	verandering	0	2016-04-27	allintitle: "Vis recruitment" OR YOY OR "Young van het jaar" OR "Leeftijd 0" OR "Vis juveniele" OR vislarven OR "vis kwekerij" OR "0 group" OR kraamkamer OR "paaien van vissen" OR "Vis reproductie" OR CPUE OR "0 fish" verandering	0		0	27-06-2017
complexity	complexiteit	0	2016-04-27	allintitle: "Vis recruitment" OR YOY OR "Young van het jaar" OR "Leeftijd 0" OR "Vis juveniele" OR vislarven OR "vis kwekerij" OR "0 group" OR kraamkamer OR "paaien van vissen" OR "Vis reproductie" OR CPUE OR "0 fish" complexiteit	0		0	27-06-2017
enhancement	Versterking	0	2016-04-27	allintitle:"Vis recruitment" OR YOY OR "Young van het jaar" OR "Leeftijd 0" OR "Vis juveniele" OR vislarven OR "vis kwekerij" OR "0 group" OR kraamkamer OR "paaien van vissen" OR "Vis reproductie" OR CPUE OR "0 fish" versterking	0		0	27-06-2017
	verbetering	0	2016-04-27	allintitle: "Vis recruitment" OR YOY OR "Young van het jaar" OR "Leeftijd 0" OR "Vis juveniele" OR vislarven OR "vis kwekerij" OR "0 group" OR kraamkamer OR "paaien van vissen" OR "Vis reproductie" OR CPUE OR "0 fish" verbetering	0		0	27-06-2017
connectivity	connectiviteit	0	2016-04-27	allintitle: "Vis recruitment" OR YOY OR "Young van het jaar" OR "Leeftijd 0" OR "Vis juveniele" OR vislarven OR "vis kwekerij" OR "0 group" OR kraamkamer OR "paaien van vissen" OR "Vis reproductie" OR CPUE OR "0 fish" connectiviteit	0		0	27-06-2017
fragmentation	fragmentatie	0	2016-04-27	allintitle: "Vis recruitment" OR YOY OR "Young van het jaar" OR "Leeftijd 0" OR "Vis juveniele" OR vislarven OR "vis kwekerij" OR "0 group" OR kraamkamer OR "paaien van vissen" OR "Vis reproductie" OR CPUE OR "0 fish" fragmentatie	0		0	27-06-2017
artificial	kunstmatig	0	2016-04-27	allintitle: "Vis recruitment" OR YOY OR "Young van het jaar" OR "Leeftijd 0" OR "Vis juveniele" OR vislarven OR "vis kwekerij" OR "0 group" OR kraamkamer OR "paaien van vissen" OR "Vis reproductie" OR CPUE OR "0 fish" kunstmatig	0		0	27-06-2017
degradation	afbraak	0	2016-04-27	allintitle: "Vis recruitment" OR YOY OR "Young van het jaar" OR "Leeftijd 0" OR "Vis juveniele" OR vislarven OR "vis kwekerij" OR "0 group" OR kraamkamer OR "paaien van vissen" OR "Vis reproductie" OR CPUE OR "0 fish" afbraak	0		0	27-06-2017
loss	verlies	0	2016-04-27	allintitle: "Vis recruitment" OR YOY OR "Young van het jaar" OR "Leeftijd 0" OR "Vis juveniele" OR vislarven OR "vis kwekerij" OR "0 group" OR kraamkamer OR "paaien van vissen" OR "Vis reproductie" OR CPUE OR "0 fish" verlies	0		0	27-06-2017
restoration	restauratie	1	2016-04-27	allintitle: "Vis recruitment" OR YOY OR "Young van het jaar" OR "Leeftijd 0" OR "Vis juveniele" OR vislarven OR "vis kwekerij" OR "0 group" OR kraamkamer OR "paaien van vissen" OR "Vis reproductie" OR CPUE OR "0 fish" restauratie	0	Duplicate	1	27-06-2017
reclamation	terugwinning	0	2016-04-27	allintitle: "Vis recruitment" OR YOY OR "Young van het jaar" OR "Leeftijd 0" OR "Vis juveniele" OR vislarven OR "vis kwekerij" OR "0 group" OR kraamkamer OR "paaien van vissen" OR "Vis reproductie" OR CPUE OR "0 fish" terugwinning	0		0	27-06-2017
	inpoldering	0	2016-04-27	allintitle: "Vis recruitment" OR YOY OR "Young van het jaar" OR "Leeftijd 0" OR "Vis juveniele" OR vislarven OR "vis kwekerij" OR "0 group" OR kraamkamer OR "paaien van vissen" OR "Vis reproductie" OR CPUE OR "0 fish" inpoldering	0		0	27-06-2017
armoring	bepantsering	0	2016-04-27	allintitle: "Vis recruitment" OR YOY OR "Young van het jaar" OR "Leeftijd 0" OR "Vis juveniele" OR vislarven OR "vis kwekerij" OR "0 group" OR kraamkamer OR "paaien van vissen" OR "Vis reproductie" OR CPUE OR "0 fish" bepantsering	0		0	27-06-2017
"beam trawl"	boomkor	2	2016-04-27	allintitle: "Vis recruitment" OR YOY OR "Young van het jaar" OR "Leeftijd 0" OR "Vis juveniele" OR vislarven OR "vis kwekerij" OR "0 group" OR kraamkamer OR "paaien van vissen" OR "Vis reproductie" OR CPUE OR "0 fish" boomkor	1		2	27-06-2017
cable	kabel	0	2016-04-27	allintitle: "Vis recruitment" OR YOY OR "Young van het jaar" OR "Leeftijd 0" OR "Vis juveniele" OR vislarven OR "vis kwekerij" OR "0 group" OR kraamkamer OR "paaien van vissen" OR "Vis reproductie" OR CPUE OR "0 fish" kabel	0		0	27-06-2017
drainage	ontwatering	0	2016-04-27	allintitle: "Vis recruitment" OR YOY OR "Young van het jaar" OR "Leeftijd 0" OR "Vis juveniele" OR vislarven OR "vis kwekerij" OR "0 group" OR kraamkamer OR "paaien van vissen" OR "Vis reproductie" OR CPUE OR "0 fish" ontwatering	0		0	27-06-2017
dredging	baggeren	0	2016-04-27	allintitle: "Vis recruitment" OR YOY OR "Young van het jaar" OR "Leeftijd 0" OR "Vis juveniele" OR vislarven OR "vis kwekerij" OR "0 group" OR kraamkamer OR "paaien van vissen" OR "Vis reproductie" OR CPUE OR "0 fish" baggeren	0		0	27-06-2017
pier	pier	0	2016-04-27	allintitle: "Vis recruitment" OR YOY OR "Young van het jaar" OR "Leeftijd 0" OR "Vis juveniele" OR vislarven OR "vis kwekerij" OR "0 group" OR kraamkamer OR "paaien van vissen" OR "Vis reproductie" OR CPUE OR "0 fish" pier	0		0	27-06-2017
port	haven	0	2016-04-27	allintitle: "Vis recruitment" OR YOY OR "Young van het jaar" OR "Leeftijd 0" OR "Vis juveniele" OR vislarven OR "vis kwekerij" OR "0 group" OR kraamkamer OR "paaien van vissen" OR "Vis reproductie" OR CPUE OR "0 fish" haven	0		0	27-06-2017
extraction	extractie	0	2016-04-27	allintitle: "Vis recruitment" OR YOY OR "Young van het jaar" OR "Leeftijd 0" OR "Vis juveniele" OR vislarven OR "vis kwekerij" OR "0 group" OR kraamkamer OR "paaien van vissen" OR "Vis reproductie" OR CPUE OR "0 fish" extractie	0		0	27-06-2017
engineering	engineering	0	2016-04-27	allintitle: "Vis recruitment" OR YOY OR "Young van het jaar" OR "Leeftijd 0" OR "Vis juveniele" OR vislarven OR "vis kwekerij" OR "0 group" OR kraamkamer OR "paaien van vissen" OR "Vis reproductie" OR CPUE OR "0 fish" engineering	0		0	27-06-2017
	bouwkunde	0	2016-04-27	allintitle: "Vis recruitment" OR YOY OR "Young van het jaar" OR "Leeftijd 0" OR "Vis juveniele" OR vislarven OR "vis kwekerij" OR "0 group" OR kraamkamer OR "paaien van vissen" OR "Vis reproductie" OR CPUE OR "0 fish" bouwkunde	0		0	27-06-2017
ship	schip	0	2016-04-27	allintitle: "Vis recruitment" OR YOY OR "Young van het jaar" OR "Leeftijd 0" OR "Vis juveniele" OR vislarven OR "vis kwekerij" OR "0 group" OR kraamkamer OR "paaien van vissen" OR "Vis reproductie" OR CPUE OR "0 fish" schip	0		0	27-06-2017
ships	schepen	0	2016-04-27	allintitle: "Vis recruitment" OR YOY OR "Young van het jaar" OR "Leeftijd 0" OR "Vis juveniele" OR vislarven OR "vis kwekerij" OR "0 group" OR kraamkamer OR "paaien van vissen" OR "Vis reproductie" OR CPUE OR "0 fish" schepen	0		0	27-06-2017
tide	tij	0	2016-04-27	allintitle: "Vis recruitment" OR YOY OR "Young van het jaar" OR "Leeftijd 0" OR "Vis juveniele" OR vislarven OR "vis kwekerij" OR "0 group" OR kraamkamer OR "paaien van vissen" OR "Vis reproductie" OR CPUE OR "0 fish" tij	0		0	27-06-2017
tidal	getij-	0	2016-04-27	allintitle: "Vis recruitment" OR YOY OR "Young van het jaar" OR "Leeftijd 0" OR "Vis juveniele" OR vislarven OR "vis kwekerij" OR "0 group" OR kraamkamer OR "paaien van vissen" OR "Vis reproductie" OR CPUE OR "0 fish" getij	0		0	27-06-2017
wave	golf	0	2016-04-27	allintitle: "Vis recruitment" OR YOY OR "Young van het jaar" OR "Leeftijd 0" OR "Vis juveniele" OR vislarven OR "vis kwekerij" OR "0 group" OR kraamkamer OR "paaien van vissen" OR "Vis reproductie" OR CPUE OR "0 fish" golf	0		0	27-06-2017
waves	golven	0	2016-04-27	allintitle: "Vis recruitment" OR YOY OR "Young van het jaar" OR "Leeftijd 0" OR "Vis juveniele" OR vislarven OR "vis kwekerij" OR "0 group" OR kraamkamer OR "paaien van vissen" OR "Vis reproductie" OR CPUE OR "0 fish" golven	0		0	27-06-2017
				total	36		52

## Sheet: GS_Finnish
4d. Google Scholar searches in Finnish
[limited to one ‘phrase’ (i.e. enclosed in double quotation marks), one ‘OR’ substring, and 256 characters]
[including patents and citations]
[Note: Google Scholar set to perform only Finnish searches]
English	Finnish - intervention search terms	Number of Results	Date	Outcome string	Full search string	Downloaded	Update	Update - date
OUTCOME SEARCH STRING ONLY	NA	7	2016-05-12	allintitle: "kalanpoikasten" OR "kalojen kutu" OR "yksikkösaaliin" OR "poikastuotantoalueet" OR "poikastuotantoalueiden"	allintitle: "kalanpoikasten" OR "kalojen kutu" OR "yksikkösaaliin" OR "poikastuotantoalueet" OR "poikastuotantoalueiden"	7	11	27-06-2017
habitat	elinympäristö	0	2016-05-12	allintitle: "kalanpoikasten" OR "kalojen kutu" OR "yksikkösaaliin" OR "poikastuotantoalueet" OR "poikastuotantoalueiden" OR "kalojen lisääntyminen" OR "kalojen lisääntyminen" OR "yksikkösaalis" OR "nuoret kalat"	allintitle: "kalanpoikasten" OR "kalojen kutu" OR "yksikkösaaliin" OR "poikastuotantoalueet" OR "poikastuotantoalueiden" elinympäristö	NO	0	27-06-2017
man-made	keinotekoinen	0	2016-05-12	allintitle: "kalanpoikasten" OR "kalojen kutu" OR "yksikkösaaliin" OR "poikastuotantoalueet" OR "poikastuotantoalueiden"	allintitle: "kalanpoikasten" OR "kalojen kutu" OR "yksikkösaaliin" OR "poikastuotantoalueet" OR "poikastuotantoalueiden" keinotekoinen	NO	0	27-06-2017
anthropogenic	ihmisperäinen	0	2016-05-12	allintitle: "kalanpoikasten" OR "kalojen kutu" OR "yksikkösaaliin" OR "poikastuotantoalueet" OR "poikastuotantoalueiden" OR "kalojen lisääntyminen" OR "kalojen lisääntyminen" OR "yksikkösaalis" OR "nuoret kalat"	allintitle: "kalanpoikasten" OR "kalojen kutu" OR "yksikkösaaliin" OR "poikastuotantoalueet" OR "poikastuotantoalueiden" ihmisperäinen	NO	0	27-06-2017
change	muutos	0	2016-05-12	allintitle: "kalanpoikasten" OR "kalojen kutu" OR "yksikkösaaliin" OR "poikastuotantoalueet" OR "poikastuotantoalueiden"	allintitle: "kalanpoikasten" OR "kalojen kutu" OR "yksikkösaaliin" OR "poikastuotantoalueet" OR "poikastuotantoalueiden" muutos	NO	0	27-06-2017
complexity	monimutkaisuus	0	2016-05-12	allintitle: "kalanpoikasten" OR "kalojen kutu" OR "yksikkösaaliin" OR "poikastuotantoalueet" OR "poikastuotantoalueiden" OR "kalojen lisääntyminen" OR "kalojen lisääntyminen" OR "yksikkösaalis" OR "nuoret kalat"	allintitle: "kalanpoikasten" OR "kalojen kutu" OR "yksikkösaaliin" OR "poikastuotantoalueet" OR "poikastuotantoalueiden" monimutkaisuus	NO	0	27-06-2017
enhancement	parannus	0	2016-05-12	allintitle: "kalanpoikasten" OR "kalojen kutu" OR "yksikkösaaliin" OR "poikastuotantoalueet" OR "poikastuotantoalueiden"	allintitle: "kalanpoikasten" OR "kalojen kutu" OR "yksikkösaaliin" OR "poikastuotantoalueet" OR "poikastuotantoalueiden" parannus	NO	0	27-06-2017
connectivity	liittyvyys	0	2016-05-12	allintitle: "kalanpoikasten" OR "kalojen kutu" OR "yksikkösaaliin" OR "poikastuotantoalueet" OR "poikastuotantoalueiden" OR "kalojen lisääntyminen" OR "kalojen lisääntyminen" OR "yksikkösaalis" OR "nuoret kalat"	allintitle: "kalanpoikasten" OR "kalojen kutu" OR "yksikkösaaliin" OR "poikastuotantoalueet" OR "poikastuotantoalueiden" liittyvyys	NO	0	27-06-2017
fragmentation	pirstoutuminen	0	2016-05-12	allintitle: "kalanpoikasten" OR "kalojen kutu" OR "yksikkösaaliin" OR "poikastuotantoalueet" OR "poikastuotantoalueiden"	allintitle: "kalanpoikasten" OR "kalojen kutu" OR "yksikkösaaliin" OR "poikastuotantoalueet" OR "poikastuotantoalueiden" pirstoutuminen	NO	0	27-06-2017
artificial	keinotekoinen	0	2016-05-12	allintitle: "kalanpoikasten" OR "kalojen kutu" OR "yksikkösaaliin" OR "poikastuotantoalueet" OR "poikastuotantoalueiden" OR "kalojen lisääntyminen" OR "kalojen lisääntyminen" OR "yksikkösaalis" OR "nuoret kalat"	allintitle: "kalanpoikasten" OR "kalojen kutu" OR "yksikkösaaliin" OR "poikastuotantoalueet" OR "poikastuotantoalueiden" keinotekoinen	NO	0	27-06-2017
degradation	pilaantuminen	0	2016-05-12	allintitle: "kalanpoikasten" OR "kalojen kutu" OR "yksikkösaaliin" OR "poikastuotantoalueet" OR "poikastuotantoalueiden"	allintitle: "kalanpoikasten" OR "kalojen kutu" OR "yksikkösaaliin" OR "poikastuotantoalueet" OR "poikastuotantoalueiden" pilaantuminen	NO	0	27-06-2017
loss	tappio	0	2016-05-12	allintitle: "kalanpoikasten" OR "kalojen kutu" OR "yksikkösaaliin" OR "poikastuotantoalueet" OR "poikastuotantoalueiden" OR "kalojen lisääntyminen" OR "kalojen lisääntyminen" OR "yksikkösaalis" OR "nuoret kalat"	allintitle: "kalanpoikasten" OR "kalojen kutu" OR "yksikkösaaliin" OR "poikastuotantoalueet" OR "poikastuotantoalueiden" tappio	NO	0	27-06-2017
	menetys	0	2016-05-12	allintitle: "kalanpoikasten" OR "kalojen kutu" OR "yksikkösaaliin" OR "poikastuotantoalueet" OR "poikastuotantoalueiden"	allintitle: "kalanpoikasten" OR "kalojen kutu" OR "yksikkösaaliin" OR "poikastuotantoalueet" OR "poikastuotantoalueiden" menetys	NO	0	27-06-2017
restoration	palauttaminen	0	2016-05-12	allintitle: "kalanpoikasten" OR "kalojen kutu" OR "yksikkösaaliin" OR "poikastuotantoalueet" OR "poikastuotantoalueiden" OR "kalojen lisääntyminen" OR "kalojen lisääntyminen" OR "yksikkösaalis" OR "nuoret kalat"	allintitle: "kalanpoikasten" OR "kalojen kutu" OR "yksikkösaaliin" OR "poikastuotantoalueet" OR "poikastuotantoalueiden" palauttaminen	NO	0	27-06-2017
reclamation	uudistaminen	0	2016-05-12	allintitle: "kalanpoikasten" OR "kalojen kutu" OR "yksikkösaaliin" OR "poikastuotantoalueet" OR "poikastuotantoalueiden"	allintitle: "kalanpoikasten" OR "kalojen kutu" OR "yksikkösaaliin" OR "poikastuotantoalueet" OR "poikastuotantoalueiden" uudistaminen	NO	0	27-06-2017
armoring	suojautuminen	0	2016-05-12	allintitle: "kalanpoikasten" OR "kalojen kutu" OR "yksikkösaaliin" OR "poikastuotantoalueet" OR "poikastuotantoalueiden" OR "kalojen lisääntyminen" OR "kalojen lisääntyminen" OR "yksikkösaalis" OR "nuoret kalat"	allintitle: "kalanpoikasten" OR "kalojen kutu" OR "yksikkösaaliin" OR "poikastuotantoalueet" OR "poikastuotantoalueiden" suojautuminen	NO	0	27-06-2017
"beam trawl"	puomitrooli	0	2016-05-12	allintitle: "kalanpoikasten" OR "kalojen kutu" OR "yksikkösaaliin" OR "poikastuotantoalueet" OR "poikastuotantoalueiden"	allintitle: "kalanpoikasten" OR "kalojen kutu" OR "yksikkösaaliin" OR "poikastuotantoalueet" OR "poikastuotantoalueiden" puomitrooli	NO	0	27-06-2017
cable	kaapeli	0	2016-05-12	allintitle: "kalanpoikasten" OR "kalojen kutu" OR "yksikkösaaliin" OR "poikastuotantoalueet" OR "poikastuotantoalueiden" OR "kalojen lisääntyminen" OR "kalojen lisääntyminen" OR "yksikkösaalis" OR "nuoret kalat"	allintitle: "kalanpoikasten" OR "kalojen kutu" OR "yksikkösaaliin" OR "poikastuotantoalueet" OR "poikastuotantoalueiden" kaapeli	NO	0	27-06-2017
drainage	kuivatus	0	2016-05-12	allintitle: "kalanpoikasten" OR "kalojen kutu" OR "yksikkösaaliin" OR "poikastuotantoalueet" OR "poikastuotantoalueiden"	allintitle: "kalanpoikasten" OR "kalojen kutu" OR "yksikkösaaliin" OR "poikastuotantoalueet" OR "poikastuotantoalueiden" kuivatus	NO	0	27-06-2017
	ojittaminen	0	2016-05-12	allintitle: "kalanpoikasten" OR "kalojen kutu" OR "yksikkösaaliin" OR "poikastuotantoalueet" OR "poikastuotantoalueiden" OR "kalojen lisääntyminen" OR "kalojen lisääntyminen" OR "yksikkösaalis" OR "nuoret kalat"	allintitle: "kalanpoikasten" OR "kalojen kutu" OR "yksikkösaaliin" OR "poikastuotantoalueet" OR "poikastuotantoalueiden" ojittaminen	NO	0	27-06-2017
dredging	ruoppaus	0	2016-05-12	allintitle: "kalanpoikasten" OR "kalojen kutu" OR "yksikkösaaliin" OR "poikastuotantoalueet" OR "poikastuotantoalueiden"	allintitle: "kalanpoikasten" OR "kalojen kutu" OR "yksikkösaaliin" OR "poikastuotantoalueet" OR "poikastuotantoalueiden" ruoppaus	NO	0	27-06-2017
pier	laituri	0	2016-05-12	allintitle: "kalanpoikasten" OR "kalojen kutu" OR "yksikkösaaliin" OR "poikastuotantoalueet" OR "poikastuotantoalueiden" OR "kalojen lisääntyminen" OR "kalojen lisääntyminen" OR "yksikkösaalis" OR "nuoret kalat"	allintitle: "kalanpoikasten" OR "kalojen kutu" OR "yksikkösaaliin" OR "poikastuotantoalueet" OR "poikastuotantoalueiden" laituri	NO	0	27-06-2017
port	satama	0	2016-05-12	allintitle: "kalanpoikasten" OR "kalojen kutu" OR "yksikkösaaliin" OR "poikastuotantoalueet" OR "poikastuotantoalueiden"	allintitle: "kalanpoikasten" OR "kalojen kutu" OR "yksikkösaaliin" OR "poikastuotantoalueet" OR "poikastuotantoalueiden" satama	NO	0	27-06-2017
extraction	poisto	0	2016-05-12	allintitle: "kalanpoikasten" OR "kalojen kutu" OR "yksikkösaaliin" OR "poikastuotantoalueet" OR "poikastuotantoalueiden" OR "kalojen lisääntyminen" OR "kalojen lisääntyminen" OR "yksikkösaalis" OR "nuoret kalat"	allintitle: "kalanpoikasten" OR "kalojen kutu" OR "yksikkösaaliin" OR "poikastuotantoalueet" OR "poikastuotantoalueiden" poisto	NO	0	27-06-2017
engineering	konetekniikka	0	2016-05-12	allintitle: "kalanpoikasten" OR "kalojen kutu" OR "yksikkösaaliin" OR "poikastuotantoalueet" OR "poikastuotantoalueiden"	allintitle: "kalanpoikasten" OR "kalojen kutu" OR "yksikkösaaliin" OR "poikastuotantoalueet" OR "poikastuotantoalueiden" konetekniikka	NO	0	27-06-2017
ship	laiva	0	2016-05-12	allintitle: "kalanpoikasten" OR "kalojen kutu" OR "yksikkösaaliin" OR "poikastuotantoalueet" OR "poikastuotantoalueiden" OR "kalojen lisääntyminen" OR "kalojen lisääntyminen" OR "yksikkösaalis" OR "nuoret kalat"	allintitle: "kalanpoikasten" OR "kalojen kutu" OR "yksikkösaaliin" OR "poikastuotantoalueet" OR "poikastuotantoalueiden" laiva	NO	0	27-06-2017
ships	laivat	0	2016-05-12	allintitle: "kalanpoikasten" OR "kalojen kutu" OR "yksikkösaaliin" OR "poikastuotantoalueet" OR "poikastuotantoalueiden"	allintitle: "kalanpoikasten" OR "kalojen kutu" OR "yksikkösaaliin" OR "poikastuotantoalueet" OR "poikastuotantoalueiden" laivat	NO	0	27-06-2017
tide	vuorovesi	0	2016-05-12	allintitle: "kalanpoikasten" OR "kalojen kutu" OR "yksikkösaaliin" OR "poikastuotantoalueet" OR "poikastuotantoalueiden" OR "kalojen lisääntyminen" OR "kalojen lisääntyminen" OR "yksikkösaalis" OR "nuoret kalat"	allintitle: "kalanpoikasten" OR "kalojen kutu" OR "yksikkösaaliin" OR "poikastuotantoalueet" OR "poikastuotantoalueiden" vuorovesi	NO	0	27-06-2017
wave	aalto	0	2016-05-12	allintitle: "kalanpoikasten" OR "kalojen kutu" OR "yksikkösaaliin" OR "poikastuotantoalueet" OR "poikastuotantoalueiden"	allintitle: "kalanpoikasten" OR "kalojen kutu" OR "yksikkösaaliin" OR "poikastuotantoalueet" OR "poikastuotantoalueiden" aalto	NO	0	27-06-2017
waves	aallot	0	2016-05-12	allintitle: "kalanpoikasten" OR "kalojen kutu" OR "yksikkösaaliin" OR "poikastuotantoalueet" OR "poikastuotantoalueiden" OR "kalojen lisääntyminen" OR "kalojen lisääntyminen" OR "yksikkösaalis" OR "nuoret kalat"	allintitle: "kalanpoikasten" OR "kalojen kutu" OR "yksikkösaaliin" OR "poikastuotantoalueet" OR "poikastuotantoalueiden" aallot	NO	0	27-06-2017
							11	27-06-2017

## Sheet: GS_German
4e. Google Scholar searches in German
[limited to one ‘phrase’ (i.e. enclosed in double quotation marks), one ‘OR’ substring, and 256 characters]
[including patents and citations]
[Note: Google Scholar set to perform only German searches]
English	German - intervention search terms	Number of Results	Date	Outcome string	Full search string	Downloaded	Update	Update - date
OUTCOME SEARCH STRING ONLY	NA			allintitle:"0 Gruppe" OR "Alter 0" OR "CPUE" OR "Einheitsfang" OR "Fischbrut" OR "Fischlaich" OR "Fischlarve" OR "Fortpflanzung" OR "Jungfisch" OR "juvenile Fische" OR "Jährlinge" OR "Kinderstube für Fische" OR "Fischbestand"	"0 Gruppe" OR "Alter 0" OR "CPUE" OR "Einheitsfang" OR "Fischbrut" OR "Fischlaich" OR "Fischlarve" OR "Fortpflanzung" OR "Jungfisch" OR "juvenile Fische" OR "Jährlinge" OR "Kinderstube für Fische" OR "Fischbestand"	NA	2300 - not specific	27-06-2017
habitat	Lebensraum	4	2016-05-23	allintitle:"0 Gruppe" OR "Alter 0" OR "CPUE" OR "Einheitsfang" OR "Fischbrut" OR "Fischlaich" OR "Fischlarve" OR "Fortpflanzung" OR "Jungfisch" OR "juvenile Fische" OR "Jährlinge" OR "Kinderstube für Fische" OR "Fischbestand"	allintitle:"0 Gruppe" OR "Alter 0" OR "CPUE" OR "Einheitsfang" OR "Fischbrut" OR "Fischlaich" OR "Fischlarve" OR "Fortpflanzung" OR "Jungfisch" OR "juvenile Fische" OR "Jährlinge" OR "Kinderstube für Fische" OR "Fischbestand" Lebensraum	NA	5	27-06-2017
	Lebensräume	0	2016-05-23	allintitle:"0 Gruppe" OR "Alter 0" OR "CPUE" OR "Einheitsfang" OR "Fischbrut" OR "Fischlaich" OR "Fischlarve" OR "Fortpflanzung" OR "Jungfisch" OR "juvenile Fische" OR "Jährlinge" OR "Kinderstube für Fische" OR "Fischbestand"	allintitle:"0 Gruppe" OR "Alter 0" OR "CPUE" OR "Einheitsfang" OR "Fischbrut" OR "Fischlaich" OR "Fischlarve" OR "Fortpflanzung" OR "Jungfisch" OR "juvenile Fische" OR "Jährlinge" OR "Kinderstube für Fische" OR "Fischbestand" Lebensräume	NA	0	27-06-2017
	Habitat	0	2016-05-23	allintitle:"0 Gruppe" OR "Alter 0" OR "CPUE" OR "Einheitsfang" OR "Fischbrut" OR "Fischlaich" OR "Fischlarve" OR "Fortpflanzung" OR "Jungfisch" OR "juvenile Fische" OR "Jährlinge" OR "Kinderstube für Fische" OR "Fischbestand"	allintitle:"0 Gruppe" OR "Alter 0" OR "CPUE" OR "Einheitsfang" OR "Fischbrut" OR "Fischlaich" OR "Fischlarve" OR "Fortpflanzung" OR "Jungfisch" OR "juvenile Fische" OR "Jährlinge" OR "Kinderstube für Fische" OR "Fischbestand" Habitat	NA	0	27-06-2017
man-made	künstlich	0	2016-05-23	allintitle:"0 Gruppe" OR "Alter 0" OR "CPUE" OR "Einheitsfang" OR "Fischbrut" OR "Fischlaich" OR "Fischlarve" OR "Fortpflanzung" OR "Jungfisch" OR "juvenile Fische" OR "Jährlinge" OR "Kinderstube für Fische" OR "Fischbestand"	allintitle:"0 Gruppe" OR "Alter 0" OR "CPUE" OR "Einheitsfang" OR "Fischbrut" OR "Fischlaich" OR "Fischlarve" OR "Fortpflanzung" OR "Jungfisch" OR "juvenile Fische" OR "Jährlinge" OR "Kinderstube für Fische" OR "Fischbestand" künstlich	NA	0	27-06-2017
anthropogenic	anthropogen	0	2016-05-23	allintitle:"0 Gruppe" OR "Alter 0" OR "CPUE" OR "Einheitsfang" OR "Fischbrut" OR "Fischlaich" OR "Fischlarve" OR "Fortpflanzung" OR "Jungfisch" OR "juvenile Fische" OR "Jährlinge" OR "Kinderstube für Fische" OR "Fischbestand"	allintitle:"0 Gruppe" OR "Alter 0" OR "CPUE" OR "Einheitsfang" OR "Fischbrut" OR "Fischlaich" OR "Fischlarve" OR "Fortpflanzung" OR "Jungfisch" OR "juvenile Fische" OR "Jährlinge" OR "Kinderstube für Fische" OR "Fischbestand" anthropogen	NA	0	27-06-2017
	"menschlich bedingt"	0	2016-05-23	allintitle:"0 Gruppe" OR "Alter 0" OR "CPUE" OR "Einheitsfang" OR "Fischbrut" OR "Fischlaich" OR "Fischlarve" OR "Fortpflanzung" OR "Jungfisch" OR "juvenile Fische" OR "Jährlinge" OR "Kinderstube für Fische" OR "Fischbestand"	allintitle:"0 Gruppe" OR "Alter 0" OR "CPUE" OR "Einheitsfang" OR "Fischbrut" OR "Fischlaich" OR "Fischlarve" OR "Fortpflanzung" OR "Jungfisch" OR "juvenile Fische" OR "Jährlinge" OR "Kinderstube für Fische" OR "Fischbestand" "menschlich bedingt"	NA	0	27-06-2017
	menschlich verursacht*	0	2016-05-23	allintitle:"0 Gruppe" OR "Alter 0" OR "CPUE" OR "Einheitsfang" OR "Fischbrut" OR "Fischlaich" OR "Fischlarve" OR "Fortpflanzung" OR "Jungfisch" OR "juvenile Fische" OR "Jährlinge" OR "Kinderstube für Fische" OR "Fischbestand"	allintitle:"0 Gruppe" OR "Alter 0" OR "CPUE" OR "Einheitsfang" OR "Fischbrut" OR "Fischlaich" OR "Fischlarve" OR "Fortpflanzung" OR "Jungfisch" OR "juvenile Fische" OR "Jährlinge" OR "Kinderstube für Fische" OR "Fischbestand" "menschlich verursacht"	NA	0	27-06-2017
change	Veränderung	0	2016-05-23	allintitle:"0 Gruppe" OR "Alter 0" OR "CPUE" OR "Einheitsfang" OR "Fischbrut" OR "Fischlaich" OR "Fischlarve" OR "Fortpflanzung" OR "Jungfisch" OR "juvenile Fische" OR "Jährlinge" OR "Kinderstube für Fische" OR "Fischbestand"	allintitle:"0 Gruppe" OR "Alter 0" OR "CPUE" OR "Einheitsfang" OR "Fischbrut" OR "Fischlaich" OR "Fischlarve" OR "Fortpflanzung" OR "Jungfisch" OR "juvenile Fische" OR "Jährlinge" OR "Kinderstube für Fische" OR "Fischbestand" Veränderung	NA	2	27-06-2017
	Änderung	0	2016-05-23	allintitle:"0 Gruppe" OR "Alter 0" OR "CPUE" OR "Einheitsfang" OR "Fischbrut" OR "Fischlaich" OR "Fischlarve" OR "Fortpflanzung" OR "Jungfisch" OR "juvenile Fische" OR "Jährlinge" OR "Kinderstube für Fische" OR "Fischbestand"	allintitle:"0 Gruppe" OR "Alter 0" OR "CPUE" OR "Einheitsfang" OR "Fischbrut" OR "Fischlaich" OR "Fischlarve" OR "Fortpflanzung" OR "Jungfisch" OR "juvenile Fische" OR "Jährlinge" OR "Kinderstube für Fische" OR "Fischbestand" Änderung	NA	0	27-06-2017
	Eingriff	0	2016-05-23	allintitle:"0 Gruppe" OR "Alter 0" OR "CPUE" OR "Einheitsfang" OR "Fischbrut" OR "Fischlaich" OR "Fischlarve" OR "Fortpflanzung" OR "Jungfisch" OR "juvenile Fische" OR "Jährlinge" OR "Kinderstube für Fische" OR "Fischbestand"	allintitle:"0 Gruppe" OR "Alter 0" OR "CPUE" OR "Einheitsfang" OR "Fischbrut" OR "Fischlaich" OR "Fischlarve" OR "Fortpflanzung" OR "Jungfisch" OR "juvenile Fische" OR "Jährlinge" OR "Kinderstube für Fische" OR "Fischbestand" Eingriff	NA	2	27-06-2017
complexity	Komplexität	0	2016-05-23	allintitle:"0 Gruppe" OR "Alter 0" OR "CPUE" OR "Einheitsfang" OR "Fischbrut" OR "Fischlaich" OR "Fischlarve" OR "Fortpflanzung" OR "Jungfisch" OR "juvenile Fische" OR "Jährlinge" OR "Kinderstube für Fische" OR "Fischbestand"	allintitle:"0 Gruppe" OR "Alter 0" OR "CPUE" OR "Einheitsfang" OR "Fischbrut" OR "Fischlaich" OR "Fischlarve" OR "Fortpflanzung" OR "Jungfisch" OR "juvenile Fische" OR "Jährlinge" OR "Kinderstube für Fische" OR "Fischbestand" Komplexität	NA	0	27-06-2017
enhancement	Erweiterung	0	2016-05-23	allintitle:"0 Gruppe" OR "Alter 0" OR "CPUE" OR "Einheitsfang" OR "Fischbrut" OR "Fischlaich" OR "Fischlarve" OR "Fortpflanzung" OR "Jungfisch" OR "juvenile Fische" OR "Jährlinge" OR "Kinderstube für Fische" OR "Fischbestand"	allintitle:"0 Gruppe" OR "Alter 0" OR "CPUE" OR "Einheitsfang" OR "Fischbrut" OR "Fischlaich" OR "Fischlarve" OR "Fortpflanzung" OR "Jungfisch" OR "juvenile Fische" OR "Jährlinge" OR "Kinderstube für Fische" OR "Fischbestand" Erweiterung	NA	1	27-06-2017
	Verbesserung	0	2016-05-23	allintitle:"0 Gruppe" OR "Alter 0" OR "CPUE" OR "Einheitsfang" OR "Fischbrut" OR "Fischlaich" OR "Fischlarve" OR "Fortpflanzung" OR "Jungfisch" OR "juvenile Fische" OR "Jährlinge" OR "Kinderstube für Fische" OR "Fischbestand"	allintitle:"0 Gruppe" OR "Alter 0" OR "CPUE" OR "Einheitsfang" OR "Fischbrut" OR "Fischlaich" OR "Fischlarve" OR "Fortpflanzung" OR "Jungfisch" OR "juvenile Fische" OR "Jährlinge" OR "Kinderstube für Fische" OR "Fischbestand" Verbesserung	NA	3	27-06-2017
connectivity	Konnektivität	0	2016-05-23	allintitle:"0 Gruppe" OR "Alter 0" OR "CPUE" OR "Einheitsfang" OR "Fischbrut" OR "Fischlaich" OR "Fischlarve" OR "Fortpflanzung" OR "Jungfisch" OR "juvenile Fische" OR "Jährlinge" OR "Kinderstube für Fische" OR "Fischbestand"	allintitle:"0 Gruppe" OR "Alter 0" OR "CPUE" OR "Einheitsfang" OR "Fischbrut" OR "Fischlaich" OR "Fischlarve" OR "Fortpflanzung" OR "Jungfisch" OR "juvenile Fische" OR "Jährlinge" OR "Kinderstube für Fische" OR "Fischbestand" Konnektivität	NA	0	27-06-2017
	Zusammenhang	0	2016-05-23	allintitle:"0 Gruppe" OR "Alter 0" OR "CPUE" OR "Einheitsfang" OR "Fischbrut" OR "Fischlaich" OR "Fischlarve" OR "Fortpflanzung" OR "Jungfisch" OR "juvenile Fische" OR "Jährlinge" OR "Kinderstube für Fische" OR "Fischbestand"	allintitle:"0 Gruppe" OR "Alter 0" OR "CPUE" OR "Einheitsfang" OR "Fischbrut" OR "Fischlaich" OR "Fischlarve" OR "Fortpflanzung" OR "Jungfisch" OR "juvenile Fische" OR "Jährlinge" OR "Kinderstube für Fische" OR "Fischbestand" Zusammenhang	NA	4	27-06-2017
fragmentation	Aufteilung	0	2016-05-23	allintitle:"0 Gruppe" OR "Alter 0" OR "CPUE" OR "Einheitsfang" OR "Fischbrut" OR "Fischlaich" OR "Fischlarve" OR "Fortpflanzung" OR "Jungfisch" OR "juvenile Fische" OR "Jährlinge" OR "Kinderstube für Fische" OR "Fischbestand"	allintitle:"0 Gruppe" OR "Alter 0" OR "CPUE" OR "Einheitsfang" OR "Fischbrut" OR "Fischlaich" OR "Fischlarve" OR "Fortpflanzung" OR "Jungfisch" OR "juvenile Fische" OR "Jährlinge" OR "Kinderstube für Fische" OR "Fischbestand" Aufteilung	NA	0	27-06-2017
	Fragmentierung	0	2016-05-23	allintitle:"0 Gruppe" OR "Alter 0" OR "CPUE" OR "Einheitsfang" OR "Fischbrut" OR "Fischlaich" OR "Fischlarve" OR "Fortpflanzung" OR "Jungfisch" OR "juvenile Fische" OR "Jährlinge" OR "Kinderstube für Fische" OR "Fischbestand"	allintitle:"0 Gruppe" OR "Alter 0" OR "CPUE" OR "Einheitsfang" OR "Fischbrut" OR "Fischlaich" OR "Fischlarve" OR "Fortpflanzung" OR "Jungfisch" OR "juvenile Fische" OR "Jährlinge" OR "Kinderstube für Fische" OR "Fischbestand" Fragmentierung	NA	0	27-06-2017
	Unterteilung	0	2016-05-23	allintitle:"0 Gruppe" OR "Alter 0" OR "CPUE" OR "Einheitsfang" OR "Fischbrut" OR "Fischlaich" OR "Fischlarve" OR "Fortpflanzung" OR "Jungfisch" OR "juvenile Fische" OR "Jährlinge" OR "Kinderstube für Fische" OR "Fischbestand"	allintitle:"0 Gruppe" OR "Alter 0" OR "CPUE" OR "Einheitsfang" OR "Fischbrut" OR "Fischlaich" OR "Fischlarve" OR "Fortpflanzung" OR "Jungfisch" OR "juvenile Fische" OR "Jährlinge" OR "Kinderstube für Fische" OR "Fischbestand" Unterteilung	NA	0	27-06-2017
artificial	künstlich	0	2016-05-23	allintitle:"0 Gruppe" OR "Alter 0" OR "CPUE" OR "Einheitsfang" OR "Fischbrut" OR "Fischlaich" OR "Fischlarve" OR "Fortpflanzung" OR "Jungfisch" OR "juvenile Fische" OR "Jährlinge" OR "Kinderstube für Fische" OR "Fischbestand"	allintitle:"0 Gruppe" OR "Alter 0" OR "CPUE" OR "Einheitsfang" OR "Fischbrut" OR "Fischlaich" OR "Fischlarve" OR "Fortpflanzung" OR "Jungfisch" OR "juvenile Fische" OR "Jährlinge" OR "Kinderstube für Fische" OR "Fischbestand" künstlich	NA	0	27-06-2017
	artifiziell	0	2016-05-23	allintitle:"0 Gruppe" OR "Alter 0" OR "CPUE" OR "Einheitsfang" OR "Fischbrut" OR "Fischlaich" OR "Fischlarve" OR "Fortpflanzung" OR "Jungfisch" OR "juvenile Fische" OR "Jährlinge" OR "Kinderstube für Fische" OR "Fischbestand"	allintitle:"0 Gruppe" OR "Alter 0" OR "CPUE" OR "Einheitsfang" OR "Fischbrut" OR "Fischlaich" OR "Fischlarve" OR "Fortpflanzung" OR "Jungfisch" OR "juvenile Fische" OR "Jährlinge" OR "Kinderstube für Fische" OR "Fischbestand" artifiziell	NA	0	27-06-2017
degradation	Degradierung	0	2016-05-23	allintitle:"0 Gruppe" OR "Alter 0" OR "CPUE" OR "Einheitsfang" OR "Fischbrut" OR "Fischlaich" OR "Fischlarve" OR "Fortpflanzung" OR "Jungfisch" OR "juvenile Fische" OR "Jährlinge" OR "Kinderstube für Fische" OR "Fischbestand"	allintitle:"0 Gruppe" OR "Alter 0" OR "CPUE" OR "Einheitsfang" OR "Fischbrut" OR "Fischlaich" OR "Fischlarve" OR "Fortpflanzung" OR "Jungfisch" OR "juvenile Fische" OR "Jährlinge" OR "Kinderstube für Fische" OR "Fischbestand" Degradierung	NA	0	27-06-2017
	Verschlechterung	0	2016-05-23	allintitle:"0 Gruppe" OR "Alter 0" OR "CPUE" OR "Einheitsfang" OR "Fischbrut" OR "Fischlaich" OR "Fischlarve" OR "Fortpflanzung" OR "Jungfisch" OR "juvenile Fische" OR "Jährlinge" OR "Kinderstube für Fische" OR "Fischbestand"	allintitle:"0 Gruppe" OR "Alter 0" OR "CPUE" OR "Einheitsfang" OR "Fischbrut" OR "Fischlaich" OR "Fischlarve" OR "Fortpflanzung" OR "Jungfisch" OR "juvenile Fische" OR "Jährlinge" OR "Kinderstube für Fische" OR "Fischbestand" Verschlechterung	NA	0	27-06-2017
loss	Verlust	0	2016-05-23	allintitle:"0 Gruppe" OR "Alter 0" OR "CPUE" OR "Einheitsfang" OR "Fischbrut" OR "Fischlaich" OR "Fischlarve" OR "Fortpflanzung" OR "Jungfisch" OR "juvenile Fische" OR "Jährlinge" OR "Kinderstube für Fische" OR "Fischbestand"	allintitle:"0 Gruppe" OR "Alter 0" OR "CPUE" OR "Einheitsfang" OR "Fischbrut" OR "Fischlaich" OR "Fischlarve" OR "Fortpflanzung" OR "Jungfisch" OR "juvenile Fische" OR "Jährlinge" OR "Kinderstube für Fische" OR "Fischbestand" Verlust	NA	0	27-06-2017
	Rückgang	0	2016-05-23	allintitle:"0 Gruppe" OR "Alter 0" OR "CPUE" OR "Einheitsfang" OR "Fischbrut" OR "Fischlaich" OR "Fischlarve" OR "Fortpflanzung" OR "Jungfisch" OR "juvenile Fische" OR "Jährlinge" OR "Kinderstube für Fische" OR "Fischbestand"	allintitle:"0 Gruppe" OR "Alter 0" OR "CPUE" OR "Einheitsfang" OR "Fischbrut" OR "Fischlaich" OR "Fischlarve" OR "Fortpflanzung" OR "Jungfisch" OR "juvenile Fische" OR "Jährlinge" OR "Kinderstube für Fische" OR "Fischbestand" Rückgang	NA	1	27-06-2017
restoration	Restaurierung	0	2016-05-23	allintitle:"0 Gruppe" OR "Alter 0" OR "CPUE" OR "Einheitsfang" OR "Fischbrut" OR "Fischlaich" OR "Fischlarve" OR "Fortpflanzung" OR "Jungfisch" OR "juvenile Fische" OR "Jährlinge" OR "Kinderstube für Fische" OR "Fischbestand"	allintitle:"0 Gruppe" OR "Alter 0" OR "CPUE" OR "Einheitsfang" OR "Fischbrut" OR "Fischlaich" OR "Fischlarve" OR "Fortpflanzung" OR "Jungfisch" OR "juvenile Fische" OR "Jährlinge" OR "Kinderstube für Fische" OR "Fischbestand" Restaurierung	NA	0	27-06-2017
	Sanierung	0	2016-05-23	allintitle:"0 Gruppe" OR "Alter 0" OR "CPUE" OR "Einheitsfang" OR "Fischbrut" OR "Fischlaich" OR "Fischlarve" OR "Fortpflanzung" OR "Jungfisch" OR "juvenile Fische" OR "Jährlinge" OR "Kinderstube für Fische" OR "Fischbestand"	allintitle:"0 Gruppe" OR "Alter 0" OR "CPUE" OR "Einheitsfang" OR "Fischbrut" OR "Fischlaich" OR "Fischlarve" OR "Fortpflanzung" OR "Jungfisch" OR "juvenile Fische" OR "Jährlinge" OR "Kinderstube für Fische" OR "Fischbestand" Sanierung	NA	0	27-06-2017
	Wiederherstellung	0	2016-05-23	allintitle:"0 Gruppe" OR "Alter 0" OR "CPUE" OR "Einheitsfang" OR "Fischbrut" OR "Fischlaich" OR "Fischlarve" OR "Fortpflanzung" OR "Jungfisch" OR "juvenile Fische" OR "Jährlinge" OR "Kinderstube für Fische" OR "Fischbestand"	allintitle:"0 Gruppe" OR "Alter 0" OR "CPUE" OR "Einheitsfang" OR "Fischbrut" OR "Fischlaich" OR "Fischlarve" OR "Fortpflanzung" OR "Jungfisch" OR "juvenile Fische" OR "Jährlinge" OR "Kinderstube für Fische" OR "Fischbestand" Wiederherstellung	NA	0	27-06-2017
	Restauration	0	2016-05-23	allintitle:"0 Gruppe" OR "Alter 0" OR "CPUE" OR "Einheitsfang" OR "Fischbrut" OR "Fischlaich" OR "Fischlarve" OR "Fortpflanzung" OR "Jungfisch" OR "juvenile Fische" OR "Jährlinge" OR "Kinderstube für Fische" OR "Fischbestand"	allintitle:"0 Gruppe" OR "Alter 0" OR "CPUE" OR "Einheitsfang" OR "Fischbrut" OR "Fischlaich" OR "Fischlarve" OR "Fortpflanzung" OR "Jungfisch" OR "juvenile Fische" OR "Jährlinge" OR "Kinderstube für Fische" OR "Fischbestand" Restauration	NA	0	27-06-2017
	Renaturierung	0	2016-05-23	allintitle:"0 Gruppe" OR "Alter 0" OR "CPUE" OR "Einheitsfang" OR "Fischbrut" OR "Fischlaich" OR "Fischlarve" OR "Fortpflanzung" OR "Jungfisch" OR "juvenile Fische" OR "Jährlinge" OR "Kinderstube für Fische" OR "Fischbestand"	allintitle:"0 Gruppe" OR "Alter 0" OR "CPUE" OR "Einheitsfang" OR "Fischbrut" OR "Fischlaich" OR "Fischlarve" OR "Fortpflanzung" OR "Jungfisch" OR "juvenile Fische" OR "Jährlinge" OR "Kinderstube für Fische" OR "Fischbestand" Renaturierung	NA	0	27-06-2017
reclamation	Rückgewinnung	0	2016-05-23	allintitle:"0 Gruppe" OR "Alter 0" OR "CPUE" OR "Einheitsfang" OR "Fischbrut" OR "Fischlaich" OR "Fischlarve" OR "Fortpflanzung" OR "Jungfisch" OR "juvenile Fische" OR "Jährlinge" OR "Kinderstube für Fische" OR "Fischbestand"	allintitle:"0 Gruppe" OR "Alter 0" OR "CPUE" OR "Einheitsfang" OR "Fischbrut" OR "Fischlaich" OR "Fischlarve" OR "Fortpflanzung" OR "Jungfisch" OR "juvenile Fische" OR "Jährlinge" OR "Kinderstube für Fische" OR "Fischbestand" Rückgewinnung	NA	0	27-06-2017
	Sanierung	0	2016-05-23	allintitle:"0 Gruppe" OR "Alter 0" OR "CPUE" OR "Einheitsfang" OR "Fischbrut" OR "Fischlaich" OR "Fischlarve" OR "Fortpflanzung" OR "Jungfisch" OR "juvenile Fische" OR "Jährlinge" OR "Kinderstube für Fische" OR "Fischbestand"	allintitle:"0 Gruppe" OR "Alter 0" OR "CPUE" OR "Einheitsfang" OR "Fischbrut" OR "Fischlaich" OR "Fischlarve" OR "Fortpflanzung" OR "Jungfisch" OR "juvenile Fische" OR "Jährlinge" OR "Kinderstube für Fische" OR "Fischbestand" Sanierung	NA	0	27-06-2017
	Regenerierung	0	2016-05-23	allintitle:"0 Gruppe" OR "Alter 0" OR "CPUE" OR "Einheitsfang" OR "Fischbrut" OR "Fischlaich" OR "Fischlarve" OR "Fortpflanzung" OR "Jungfisch" OR "juvenile Fische" OR "Jährlinge" OR "Kinderstube für Fische" OR "Fischbestand"	allintitle:"0 Gruppe" OR "Alter 0" OR "CPUE" OR "Einheitsfang" OR "Fischbrut" OR "Fischlaich" OR "Fischlarve" OR "Fortpflanzung" OR "Jungfisch" OR "juvenile Fische" OR "Jährlinge" OR "Kinderstube für Fische" OR "Fischbestand" Regenerierung	NA	0	27-06-2017
	Wiedergewinnung	0	2016-05-23	allintitle:"0 Gruppe" OR "Alter 0" OR "CPUE" OR "Einheitsfang" OR "Fischbrut" OR "Fischlaich" OR "Fischlarve" OR "Fortpflanzung" OR "Jungfisch" OR "juvenile Fische" OR "Jährlinge" OR "Kinderstube für Fische" OR "Fischbestand"	allintitle:"0 Gruppe" OR "Alter 0" OR "CPUE" OR "Einheitsfang" OR "Fischbrut" OR "Fischlaich" OR "Fischlarve" OR "Fortpflanzung" OR "Jungfisch" OR "juvenile Fische" OR "Jährlinge" OR "Kinderstube für Fische" OR "Fischbestand" Wiedergewinnung	NA	0	27-06-2017
	Wiederurbarmachung	0	2016-05-23	allintitle:"0 Gruppe" OR "Alter 0" OR "CPUE" OR "Einheitsfang" OR "Fischbrut" OR "Fischlaich" OR "Fischlarve" OR "Fortpflanzung" OR "Jungfisch" OR "juvenile Fische" OR "Jährlinge" OR "Kinderstube für Fische" OR "Fischbestand"	allintitle:"0 Gruppe" OR "Alter 0" OR "CPUE" OR "Einheitsfang" OR "Fischbrut" OR "Fischlaich" OR "Fischlarve" OR "Fortpflanzung" OR "Jungfisch" OR "juvenile Fische" OR "Jährlinge" OR "Kinderstube für Fische" OR "Fischbestand" Wiederurbarmachung	NA	0	27-06-2017
	Urbarmachung	0	2016-05-23	allintitle:"0 Gruppe" OR "Alter 0" OR "CPUE" OR "Einheitsfang" OR "Fischbrut" OR "Fischlaich" OR "Fischlarve" OR "Fortpflanzung" OR "Jungfisch" OR "juvenile Fische" OR "Jährlinge" OR "Kinderstube für Fische" OR "Fischbestand"	allintitle:"0 Gruppe" OR "Alter 0" OR "CPUE" OR "Einheitsfang" OR "Fischbrut" OR "Fischlaich" OR "Fischlarve" OR "Fortpflanzung" OR "Jungfisch" OR "juvenile Fische" OR "Jährlinge" OR "Kinderstube für Fische" OR "Fischbestand" Urbarmachung	NA	0	27-06-2017
	Wiedernutzbarmachung	0	2016-05-23	allintitle:"0 Gruppe" OR "Alter 0" OR "CPUE" OR "Einheitsfang" OR "Fischbrut" OR "Fischlaich" OR "Fischlarve" OR "Fortpflanzung" OR "Jungfisch" OR "juvenile Fische" OR "Jährlinge" OR "Kinderstube für Fische" OR "Fischbestand"	allintitle:"0 Gruppe" OR "Alter 0" OR "CPUE" OR "Einheitsfang" OR "Fischbrut" OR "Fischlaich" OR "Fischlarve" OR "Fortpflanzung" OR "Jungfisch" OR "juvenile Fische" OR "Jährlinge" OR "Kinderstube für Fische" OR "Fischbestand" Wiedernutzbarmachung	NA	0	27-06-2017
	Neulandgewinnung	0	2016-05-23	allintitle:"0 Gruppe" OR "Alter 0" OR "CPUE" OR "Einheitsfang" OR "Fischbrut" OR "Fischlaich" OR "Fischlarve" OR "Fortpflanzung" OR "Jungfisch" OR "juvenile Fische" OR "Jährlinge" OR "Kinderstube für Fische" OR "Fischbestand"	allintitle:"0 Gruppe" OR "Alter 0" OR "CPUE" OR "Einheitsfang" OR "Fischbrut" OR "Fischlaich" OR "Fischlarve" OR "Fortpflanzung" OR "Jungfisch" OR "juvenile Fische" OR "Jährlinge" OR "Kinderstube für Fische" OR "Fischbestand" Neulandgewinnung	NA	0	27-06-2017
	Rekultivierung	0	2016-05-23	allintitle:"0 Gruppe" OR "Alter 0" OR "CPUE" OR "Einheitsfang" OR "Fischbrut" OR "Fischlaich" OR "Fischlarve" OR "Fortpflanzung" OR "Jungfisch" OR "juvenile Fische" OR "Jährlinge" OR "Kinderstube für Fische" OR "Fischbestand"	allintitle:"0 Gruppe" OR "Alter 0" OR "CPUE" OR "Einheitsfang" OR "Fischbrut" OR "Fischlaich" OR "Fischlarve" OR "Fortpflanzung" OR "Jungfisch" OR "juvenile Fische" OR "Jährlinge" OR "Kinderstube für Fische" OR "Fischbestand" Rekultivierung	NA	0	27-06-2017
armoring	Panzerung	0	2016-05-23	allintitle:"0 Gruppe" OR "Alter 0" OR "CPUE" OR "Einheitsfang" OR "Fischbrut" OR "Fischlaich" OR "Fischlarve" OR "Fortpflanzung" OR "Jungfisch" OR "juvenile Fische" OR "Jährlinge" OR "Kinderstube für Fische" OR "Fischbestand"	allintitle:"0 Gruppe" OR "Alter 0" OR "CPUE" OR "Einheitsfang" OR "Fischbrut" OR "Fischlaich" OR "Fischlarve" OR "Fortpflanzung" OR "Jungfisch" OR "juvenile Fische" OR "Jährlinge" OR "Kinderstube für Fische" OR "Fischbestand" Panzerung	NA	0	27-06-2017
	Bewehrung	0	2016-05-23	allintitle:"0 Gruppe" OR "Alter 0" OR "CPUE" OR "Einheitsfang" OR "Fischbrut" OR "Fischlaich" OR "Fischlarve" OR "Fortpflanzung" OR "Jungfisch" OR "juvenile Fische" OR "Jährlinge" OR "Kinderstube für Fische" OR "Fischbestand"	allintitle:"0 Gruppe" OR "Alter 0" OR "CPUE" OR "Einheitsfang" OR "Fischbrut" OR "Fischlaich" OR "Fischlarve" OR "Fortpflanzung" OR "Jungfisch" OR "juvenile Fische" OR "Jährlinge" OR "Kinderstube für Fische" OR "Fischbestand" Bewehrung	NA	0	27-06-2017
"beam trawl"	Baumkurre	0	2016-05-23	allintitle:"0 Gruppe" OR "Alter 0" OR "CPUE" OR "Einheitsfang" OR "Fischbrut" OR "Fischlaich" OR "Fischlarve" OR "Fortpflanzung" OR "Jungfisch" OR "juvenile Fische" OR "Jährlinge" OR "Kinderstube für Fische" OR "Fischbestand"	allintitle:"0 Gruppe" OR "Alter 0" OR "CPUE" OR "Einheitsfang" OR "Fischbrut" OR "Fischlaich" OR "Fischlarve" OR "Fortpflanzung" OR "Jungfisch" OR "juvenile Fische" OR "Jährlinge" OR "Kinderstube für Fische" OR "Fischbestand" Baumkurre	NA	0	27-06-2017
	Schleppnetz	0	2016-05-23	allintitle:"0 Gruppe" OR "Alter 0" OR "CPUE" OR "Einheitsfang" OR "Fischbrut" OR "Fischlaich" OR "Fischlarve" OR "Fortpflanzung" OR "Jungfisch" OR "juvenile Fische" OR "Jährlinge" OR "Kinderstube für Fische" OR "Fischbestand"	allintitle:"0 Gruppe" OR "Alter 0" OR "CPUE" OR "Einheitsfang" OR "Fischbrut" OR "Fischlaich" OR "Fischlarve" OR "Fortpflanzung" OR "Jungfisch" OR "juvenile Fische" OR "Jährlinge" OR "Kinderstube für Fische" OR "Fischbestand" Schleppnetz	NA	0	27-06-2017
cable	Kabel	0	2016-05-23	allintitle:"0 Gruppe" OR "Alter 0" OR "CPUE" OR "Einheitsfang" OR "Fischbrut" OR "Fischlaich" OR "Fischlarve" OR "Fortpflanzung" OR "Jungfisch" OR "juvenile Fische" OR "Jährlinge" OR "Kinderstube für Fische" OR "Fischbestand"	allintitle:"0 Gruppe" OR "Alter 0" OR "CPUE" OR "Einheitsfang" OR "Fischbrut" OR "Fischlaich" OR "Fischlarve" OR "Fortpflanzung" OR "Jungfisch" OR "juvenile Fische" OR "Jährlinge" OR "Kinderstube für Fische" OR "Fischbestand" Kabel	NA	0	27-06-2017
	Leitung	0	2016-05-23	allintitle:"0 Gruppe" OR "Alter 0" OR "CPUE" OR "Einheitsfang" OR "Fischbrut" OR "Fischlaich" OR "Fischlarve" OR "Fortpflanzung" OR "Jungfisch" OR "juvenile Fische" OR "Jährlinge" OR "Kinderstube für Fische" OR "Fischbestand"	allintitle:"0 Gruppe" OR "Alter 0" OR "CPUE" OR "Einheitsfang" OR "Fischbrut" OR "Fischlaich" OR "Fischlarve" OR "Fortpflanzung" OR "Jungfisch" OR "juvenile Fische" OR "Jährlinge" OR "Kinderstube für Fische" OR "Fischbestand" Leitung	NA	1	27-06-2017
drainage	Entwässerung	0	2016-05-23	allintitle:"0 Gruppe" OR "Alter 0" OR "CPUE" OR "Einheitsfang" OR "Fischbrut" OR "Fischlaich" OR "Fischlarve" OR "Fortpflanzung" OR "Jungfisch" OR "juvenile Fische" OR "Jährlinge" OR "Kinderstube für Fische" OR "Fischbestand"	allintitle:"0 Gruppe" OR "Alter 0" OR "CPUE" OR "Einheitsfang" OR "Fischbrut" OR "Fischlaich" OR "Fischlarve" OR "Fortpflanzung" OR "Jungfisch" OR "juvenile Fische" OR "Jährlinge" OR "Kinderstube für Fische" OR "Fischbestand" Entwässerung	NA	0	27-06-2017
	Abfluss	0	2016-05-23	allintitle:"0 Gruppe" OR "Alter 0" OR "CPUE" OR "Einheitsfang" OR "Fischbrut" OR "Fischlaich" OR "Fischlarve" OR "Fortpflanzung" OR "Jungfisch" OR "juvenile Fische" OR "Jährlinge" OR "Kinderstube für Fische" OR "Fischbestand"	allintitle:"0 Gruppe" OR "Alter 0" OR "CPUE" OR "Einheitsfang" OR "Fischbrut" OR "Fischlaich" OR "Fischlarve" OR "Fortpflanzung" OR "Jungfisch" OR "juvenile Fische" OR "Jährlinge" OR "Kinderstube für Fische" OR "Fischbestand" Abfluss	NA	0	27-06-2017
	Trockenlegung	0	2016-05-23	allintitle:"0 Gruppe" OR "Alter 0" OR "CPUE" OR "Einheitsfang" OR "Fischbrut" OR "Fischlaich" OR "Fischlarve" OR "Fortpflanzung" OR "Jungfisch" OR "juvenile Fische" OR "Jährlinge" OR "Kinderstube für Fische" OR "Fischbestand"	allintitle:"0 Gruppe" OR "Alter 0" OR "CPUE" OR "Einheitsfang" OR "Fischbrut" OR "Fischlaich" OR "Fischlarve" OR "Fortpflanzung" OR "Jungfisch" OR "juvenile Fische" OR "Jährlinge" OR "Kinderstube für Fische" OR "Fischbestand" Trockenlegung	NA	0	27-06-2017
dredging	Ausbaggern	0	2016-05-23	allintitle:"0 Gruppe" OR "Alter 0" OR "CPUE" OR "Einheitsfang" OR "Fischbrut" OR "Fischlaich" OR "Fischlarve" OR "Fortpflanzung" OR "Jungfisch" OR "juvenile Fische" OR "Jährlinge" OR "Kinderstube für Fische" OR "Fischbestand"	allintitle:"0 Gruppe" OR "Alter 0" OR "CPUE" OR "Einheitsfang" OR "Fischbrut" OR "Fischlaich" OR "Fischlarve" OR "Fortpflanzung" OR "Jungfisch" OR "juvenile Fische" OR "Jährlinge" OR "Kinderstube für Fische" OR "Fischbestand" Ausbaggern	NA	0	27-06-2017
	Ausbaggerung	0	2016-05-23	allintitle:"0 Gruppe" OR "Alter 0" OR "CPUE" OR "Einheitsfang" OR "Fischbrut" OR "Fischlaich" OR "Fischlarve" OR "Fortpflanzung" OR "Jungfisch" OR "juvenile Fische" OR "Jährlinge" OR "Kinderstube für Fische" OR "Fischbestand"	allintitle:"0 Gruppe" OR "Alter 0" OR "CPUE" OR "Einheitsfang" OR "Fischbrut" OR "Fischlaich" OR "Fischlarve" OR "Fortpflanzung" OR "Jungfisch" OR "juvenile Fische" OR "Jährlinge" OR "Kinderstube für Fische" OR "Fischbestand" Ausbaggerung	NA	0	27-06-2017
	Baggern	0	2016-05-23	allintitle:"0 Gruppe" OR "Alter 0" OR "CPUE" OR "Einheitsfang" OR "Fischbrut" OR "Fischlaich" OR "Fischlarve" OR "Fortpflanzung" OR "Jungfisch" OR "juvenile Fische" OR "Jährlinge" OR "Kinderstube für Fische" OR "Fischbestand"	allintitle:"0 Gruppe" OR "Alter 0" OR "CPUE" OR "Einheitsfang" OR "Fischbrut" OR "Fischlaich" OR "Fischlarve" OR "Fortpflanzung" OR "Jungfisch" OR "juvenile Fische" OR "Jährlinge" OR "Kinderstube für Fische" OR "Fischbestand" Baggern	NA	0	27-06-2017
pier	Kai	0	2016-05-23	allintitle:"0 Gruppe" OR "Alter 0" OR "CPUE" OR "Einheitsfang" OR "Fischbrut" OR "Fischlaich" OR "Fischlarve" OR "Fortpflanzung" OR "Jungfisch" OR "juvenile Fische" OR "Jährlinge" OR "Kinderstube für Fische" OR "Fischbestand"	allintitle:"0 Gruppe" OR "Alter 0" OR "CPUE" OR "Einheitsfang" OR "Fischbrut" OR "Fischlaich" OR "Fischlarve" OR "Fortpflanzung" OR "Jungfisch" OR "juvenile Fische" OR "Jährlinge" OR "Kinderstube für Fische" OR "Fischbestand" Kai	NA	0	27-06-2017
	Hafendamm	0	2016-05-23	allintitle:"0 Gruppe" OR "Alter 0" OR "CPUE" OR "Einheitsfang" OR "Fischbrut" OR "Fischlaich" OR "Fischlarve" OR "Fortpflanzung" OR "Jungfisch" OR "juvenile Fische" OR "Jährlinge" OR "Kinderstube für Fische" OR "Fischbestand"	allintitle:"0 Gruppe" OR "Alter 0" OR "CPUE" OR "Einheitsfang" OR "Fischbrut" OR "Fischlaich" OR "Fischlarve" OR "Fortpflanzung" OR "Jungfisch" OR "juvenile Fische" OR "Jährlinge" OR "Kinderstube für Fische" OR "Fischbestand" Hafendamm	NA	0	27-06-2017
	Anleger	0	2016-05-23	allintitle:"0 Gruppe" OR "Alter 0" OR "CPUE" OR "Einheitsfang" OR "Fischbrut" OR "Fischlaich" OR "Fischlarve" OR "Fortpflanzung" OR "Jungfisch" OR "juvenile Fische" OR "Jährlinge" OR "Kinderstube für Fische" OR "Fischbestand"	allintitle:"0 Gruppe" OR "Alter 0" OR "CPUE" OR "Einheitsfang" OR "Fischbrut" OR "Fischlaich" OR "Fischlarve" OR "Fortpflanzung" OR "Jungfisch" OR "juvenile Fische" OR "Jährlinge" OR "Kinderstube für Fische" OR "Fischbestand" Anleger	NA	0	27-06-2017
	Landungsbrücke	0	2016-05-23	allintitle:"0 Gruppe" OR "Alter 0" OR "CPUE" OR "Einheitsfang" OR "Fischbrut" OR "Fischlaich" OR "Fischlarve" OR "Fortpflanzung" OR "Jungfisch" OR "juvenile Fische" OR "Jährlinge" OR "Kinderstube für Fische" OR "Fischbestand"	allintitle:"0 Gruppe" OR "Alter 0" OR "CPUE" OR "Einheitsfang" OR "Fischbrut" OR "Fischlaich" OR "Fischlarve" OR "Fortpflanzung" OR "Jungfisch" OR "juvenile Fische" OR "Jährlinge" OR "Kinderstube für Fische" OR "Fischbestand" Landungsbrücke	NA	0	27-06-2017
port	Hafen	0	2016-05-23	allintitle:"0 Gruppe" OR "Alter 0" OR "CPUE" OR "Einheitsfang" OR "Fischbrut" OR "Fischlaich" OR "Fischlarve" OR "Fortpflanzung" OR "Jungfisch" OR "juvenile Fische" OR "Jährlinge" OR "Kinderstube für Fische" OR "Fischbestand"	allintitle:"0 Gruppe" OR "Alter 0" OR "CPUE" OR "Einheitsfang" OR "Fischbrut" OR "Fischlaich" OR "Fischlarve" OR "Fortpflanzung" OR "Jungfisch" OR "juvenile Fische" OR "Jährlinge" OR "Kinderstube für Fische" OR "Fischbestand" Hafen	NA	1	27-06-2017
extraction	Extraktion	0	2016-05-23	allintitle:"0 Gruppe" OR "Alter 0" OR "CPUE" OR "Einheitsfang" OR "Fischbrut" OR "Fischlaich" OR "Fischlarve" OR "Fortpflanzung" OR "Jungfisch" OR "juvenile Fische" OR "Jährlinge" OR "Kinderstube für Fische" OR "Fischbestand"	allintitle:"0 Gruppe" OR "Alter 0" OR "CPUE" OR "Einheitsfang" OR "Fischbrut" OR "Fischlaich" OR "Fischlarve" OR "Fortpflanzung" OR "Jungfisch" OR "juvenile Fische" OR "Jährlinge" OR "Kinderstube für Fische" OR "Fischbestand" Extraktion	NA	0	27-06-2017
	Auszug	0	2016-05-23	allintitle:"0 Gruppe" OR "Alter 0" OR "CPUE" OR "Einheitsfang" OR "Fischbrut" OR "Fischlaich" OR "Fischlarve" OR "Fortpflanzung" OR "Jungfisch" OR "juvenile Fische" OR "Jährlinge" OR "Kinderstube für Fische" OR "Fischbestand"	allintitle:"0 Gruppe" OR "Alter 0" OR "CPUE" OR "Einheitsfang" OR "Fischbrut" OR "Fischlaich" OR "Fischlarve" OR "Fortpflanzung" OR "Jungfisch" OR "juvenile Fische" OR "Jährlinge" OR "Kinderstube für Fische" OR "Fischbestand" Auszug	NA	0	27-06-2017
	Entnahme	0	2016-05-23	allintitle:"0 Gruppe" OR "Alter 0" OR "CPUE" OR "Einheitsfang" OR "Fischbrut" OR "Fischlaich" OR "Fischlarve" OR "Fortpflanzung" OR "Jungfisch" OR "juvenile Fische" OR "Jährlinge" OR "Kinderstube für Fische" OR "Fischbestand"	allintitle:"0 Gruppe" OR "Alter 0" OR "CPUE" OR "Einheitsfang" OR "Fischbrut" OR "Fischlaich" OR "Fischlarve" OR "Fortpflanzung" OR "Jungfisch" OR "juvenile Fische" OR "Jährlinge" OR "Kinderstube für Fische" OR "Fischbestand" Entnahme	NA	0	27-06-2017
engineering	Maschinenbau	0	2016-05-23	allintitle:"0 Gruppe" OR "Alter 0" OR "CPUE" OR "Einheitsfang" OR "Fischbrut" OR "Fischlaich" OR "Fischlarve" OR "Fortpflanzung" OR "Jungfisch" OR "juvenile Fische" OR "Jährlinge" OR "Kinderstube für Fische" OR "Fischbestand"	allintitle:"0 Gruppe" OR "Alter 0" OR "CPUE" OR "Einheitsfang" OR "Fischbrut" OR "Fischlaich" OR "Fischlarve" OR "Fortpflanzung" OR "Jungfisch" OR "juvenile Fische" OR "Jährlinge" OR "Kinderstube für Fische" OR "Fischbestand" Maschinenbau	NA	0	27-06-2017
	Ingenieurwissenschaften	0	2016-05-23	allintitle:"0 Gruppe" OR "Alter 0" OR "CPUE" OR "Einheitsfang" OR "Fischbrut" OR "Fischlaich" OR "Fischlarve" OR "Fortpflanzung" OR "Jungfisch" OR "juvenile Fische" OR "Jährlinge" OR "Kinderstube für Fische" OR "Fischbestand"	allintitle:"0 Gruppe" OR "Alter 0" OR "CPUE" OR "Einheitsfang" OR "Fischbrut" OR "Fischlaich" OR "Fischlarve" OR "Fortpflanzung" OR "Jungfisch" OR "juvenile Fische" OR "Jährlinge" OR "Kinderstube für Fische" OR "Fischbestand" Ingenieurwissenschaften	NA	0	27-06-2017
	technisch	0	2016-05-23	allintitle:"0 Gruppe" OR "Alter 0" OR "CPUE" OR "Einheitsfang" OR "Fischbrut" OR "Fischlaich" OR "Fischlarve" OR "Fortpflanzung" OR "Jungfisch" OR "juvenile Fische" OR "Jährlinge" OR "Kinderstube für Fische" OR "Fischbestand"	allintitle:"0 Gruppe" OR "Alter 0" OR "CPUE" OR "Einheitsfang" OR "Fischbrut" OR "Fischlaich" OR "Fischlarve" OR "Fortpflanzung" OR "Jungfisch" OR "juvenile Fische" OR "Jährlinge" OR "Kinderstube für Fische" OR "Fischbestand" technisch	NA	0	27-06-2017
	Technik	0	2016-05-23	allintitle:"0 Gruppe" OR "Alter 0" OR "CPUE" OR "Einheitsfang" OR "Fischbrut" OR "Fischlaich" OR "Fischlarve" OR "Fortpflanzung" OR "Jungfisch" OR "juvenile Fische" OR "Jährlinge" OR "Kinderstube für Fische" OR "Fischbestand"	allintitle:"0 Gruppe" OR "Alter 0" OR "CPUE" OR "Einheitsfang" OR "Fischbrut" OR "Fischlaich" OR "Fischlarve" OR "Fortpflanzung" OR "Jungfisch" OR "juvenile Fische" OR "Jährlinge" OR "Kinderstube für Fische" OR "Fischbestand" Technik	NA	1	27-06-2017
	Konstruktion	0	2016-05-23	allintitle:"0 Gruppe" OR "Alter 0" OR "CPUE" OR "Einheitsfang" OR "Fischbrut" OR "Fischlaich" OR "Fischlarve" OR "Fortpflanzung" OR "Jungfisch" OR "juvenile Fische" OR "Jährlinge" OR "Kinderstube für Fische" OR "Fischbestand"	allintitle:"0 Gruppe" OR "Alter 0" OR "CPUE" OR "Einheitsfang" OR "Fischbrut" OR "Fischlaich" OR "Fischlarve" OR "Fortpflanzung" OR "Jungfisch" OR "juvenile Fische" OR "Jährlinge" OR "Kinderstube für Fische" OR "Fischbestand" Konstruktion	NA	1	27-06-2017
	Konstruieren	0	2016-05-23	allintitle:"0 Gruppe" OR "Alter 0" OR "CPUE" OR "Einheitsfang" OR "Fischbrut" OR "Fischlaich" OR "Fischlarve" OR "Fortpflanzung" OR "Jungfisch" OR "juvenile Fische" OR "Jährlinge" OR "Kinderstube für Fische" OR "Fischbestand"	allintitle:"0 Gruppe" OR "Alter 0" OR "CPUE" OR "Einheitsfang" OR "Fischbrut" OR "Fischlaich" OR "Fischlarve" OR "Fortpflanzung" OR "Jungfisch" OR "juvenile Fische" OR "Jährlinge" OR "Kinderstube für Fische" OR "Fischbestand" Konstruieren	NA	0	27-06-2017
ship	Schiff	0	2016-05-23	allintitle:"0 Gruppe" OR "Alter 0" OR "CPUE" OR "Einheitsfang" OR "Fischbrut" OR "Fischlaich" OR "Fischlarve" OR "Fortpflanzung" OR "Jungfisch" OR "juvenile Fische" OR "Jährlinge" OR "Kinderstube für Fische" OR "Fischbestand"	allintitle:"0 Gruppe" OR "Alter 0" OR "CPUE" OR "Einheitsfang" OR "Fischbrut" OR "Fischlaich" OR "Fischlarve" OR "Fortpflanzung" OR "Jungfisch" OR "juvenile Fische" OR "Jährlinge" OR "Kinderstube für Fische" OR "Fischbestand" Schiff	NA	0	27-06-2017
ships	Schiffe	0	2016-05-23	allintitle:"0 Gruppe" OR "Alter 0" OR "CPUE" OR "Einheitsfang" OR "Fischbrut" OR "Fischlaich" OR "Fischlarve" OR "Fortpflanzung" OR "Jungfisch" OR "juvenile Fische" OR "Jährlinge" OR "Kinderstube für Fische" OR "Fischbestand"	allintitle:"0 Gruppe" OR "Alter 0" OR "CPUE" OR "Einheitsfang" OR "Fischbrut" OR "Fischlaich" OR "Fischlarve" OR "Fortpflanzung" OR "Jungfisch" OR "juvenile Fische" OR "Jährlinge" OR "Kinderstube für Fische" OR "Fischbestand" Schiffe	NA	0	27-06-2017
tide	Gezeiten	0	2016-05-23	allintitle:"0 Gruppe" OR "Alter 0" OR "CPUE" OR "Einheitsfang" OR "Fischbrut" OR "Fischlaich" OR "Fischlarve" OR "Fortpflanzung" OR "Jungfisch" OR "juvenile Fische" OR "Jährlinge" OR "Kinderstube für Fische" OR "Fischbestand"	allintitle:"0 Gruppe" OR "Alter 0" OR "CPUE" OR "Einheitsfang" OR "Fischbrut" OR "Fischlaich" OR "Fischlarve" OR "Fortpflanzung" OR "Jungfisch" OR "juvenile Fische" OR "Jährlinge" OR "Kinderstube für Fische" OR "Fischbestand" Gezeiten	NA	0	27-06-2017
tidal	Tide-	0	2016-05-23	allintitle:"0 Gruppe" OR "Alter 0" OR "CPUE" OR "Einheitsfang" OR "Fischbrut" OR "Fischlaich" OR "Fischlarve" OR "Fortpflanzung" OR "Jungfisch" OR "juvenile Fische" OR "Jährlinge" OR "Kinderstube für Fische" OR "Fischbestand"	allintitle:"0 Gruppe" OR "Alter 0" OR "CPUE" OR "Einheitsfang" OR "Fischbrut" OR "Fischlaich" OR "Fischlarve" OR "Fortpflanzung" OR "Jungfisch" OR "juvenile Fische" OR "Jährlinge" OR "Kinderstube für Fische" OR "Fischbestand" Tide-	NA	0	27-06-2017
	Gezeiten-	0	2016-05-23	allintitle:"0 Gruppe" OR "Alter 0" OR "CPUE" OR "Einheitsfang" OR "Fischbrut" OR "Fischlaich" OR "Fischlarve" OR "Fortpflanzung" OR "Jungfisch" OR "juvenile Fische" OR "Jährlinge" OR "Kinderstube für Fische" OR "Fischbestand"	allintitle:"0 Gruppe" OR "Alter 0" OR "CPUE" OR "Einheitsfang" OR "Fischbrut" OR "Fischlaich" OR "Fischlarve" OR "Fortpflanzung" OR "Jungfisch" OR "juvenile Fische" OR "Jährlinge" OR "Kinderstube für Fische" OR "Fischbestand" Gezeiten-	NA	0	27-06-2017
	tidenbeeinflusst	0	2016-05-23	allintitle:"0 Gruppe" OR "Alter 0" OR "CPUE" OR "Einheitsfang" OR "Fischbrut" OR "Fischlaich" OR "Fischlarve" OR "Fortpflanzung" OR "Jungfisch" OR "juvenile Fische" OR "Jährlinge" OR "Kinderstube für Fische" OR "Fischbestand"	allintitle:"0 Gruppe" OR "Alter 0" OR "CPUE" OR "Einheitsfang" OR "Fischbrut" OR "Fischlaich" OR "Fischlarve" OR "Fortpflanzung" OR "Jungfisch" OR "juvenile Fische" OR "Jährlinge" OR "Kinderstube für Fische" OR "Fischbestand" tidenbeeinflusst	NA	0	27-06-2017
	gezeitenbeeinflusst	0	2016-05-23	allintitle:"0 Gruppe" OR "Alter 0" OR "CPUE" OR "Einheitsfang" OR "Fischbrut" OR "Fischlaich" OR "Fischlarve" OR "Fortpflanzung" OR "Jungfisch" OR "juvenile Fische" OR "Jährlinge" OR "Kinderstube für Fische" OR "Fischbestand"	allintitle:"0 Gruppe" OR "Alter 0" OR "CPUE" OR "Einheitsfang" OR "Fischbrut" OR "Fischlaich" OR "Fischlarve" OR "Fortpflanzung" OR "Jungfisch" OR "juvenile Fische" OR "Jährlinge" OR "Kinderstube für Fische" OR "Fischbestand" gezeitenbeeinflusst	NA	0	27-06-2017
wave	Welle	0	2016-05-23	allintitle:"0 Gruppe" OR "Alter 0" OR "CPUE" OR "Einheitsfang" OR "Fischbrut" OR "Fischlaich" OR "Fischlarve" OR "Fortpflanzung" OR "Jungfisch" OR "juvenile Fische" OR "Jährlinge" OR "Kinderstube für Fische" OR "Fischbestand"	allintitle:"0 Gruppe" OR "Alter 0" OR "CPUE" OR "Einheitsfang" OR "Fischbrut" OR "Fischlaich" OR "Fischlarve" OR "Fortpflanzung" OR "Jungfisch" OR "juvenile Fische" OR "Jährlinge" OR "Kinderstube für Fische" OR "Fischbestand" Welle	NA	3	27-06-2017
waves	Wellen	0	2016-05-23	allintitle:"0 Gruppe" OR "Alter 0" OR "CPUE" OR "Einheitsfang" OR "Fischbrut" OR "Fischlaich" OR "Fischlarve" OR "Fortpflanzung" OR "Jungfisch" OR "juvenile Fische" OR "Jährlinge" OR "Kinderstube für Fische" OR "Fischbestand"	allintitle:"0 Gruppe" OR "Alter 0" OR "CPUE" OR "Einheitsfang" OR "Fischbrut" OR "Fischlaich" OR "Fischlarve" OR "Fortpflanzung" OR "Jungfisch" OR "juvenile Fische" OR "Jährlinge" OR "Kinderstube für Fische" OR "Fischbestand" Wellen	NA	39	27-06-2017
	Einfluss	0	2016-05-23	allintitle:"0 Gruppe" OR "Alter 0" OR "CPUE" OR "Einheitsfang" OR "Fischbrut" OR "Fischlaich" OR "Fischlarve" OR "Fortpflanzung" OR "Jungfisch" OR "juvenile Fische" OR "Jährlinge" OR "Kinderstube für Fische" OR "Fischbestand"	allintitle:"0 Gruppe" OR "Alter 0" OR "CPUE" OR "Einheitsfang" OR "Fischbrut" OR "Fischlaich" OR "Fischlarve" OR "Fortpflanzung" OR "Jungfisch" OR "juvenile Fische" OR "Jährlinge" OR "Kinderstube für Fische" OR "Fischbestand" Einfluss	NA	40	27-06-2017
	"anthropogen beeinflusst"	0	2016-05-23	allintitle:"0 Gruppe" OR "Alter 0" OR "CPUE" OR "Einheitsfang" OR "Fischbrut" OR "Fischlaich" OR "Fischlarve" OR "Fortpflanzung" OR "Jungfisch" OR "juvenile Fische" OR "Jährlinge" OR "Kinderstube für Fische" OR "Fischbestand"	allintitle:"0 Gruppe" OR "Alter 0" OR "CPUE" OR "Einheitsfang" OR "Fischbrut" OR "Fischlaich" OR "Fischlarve" OR "Fortpflanzung" OR "Jungfisch" OR "juvenile Fische" OR "Jährlinge" OR "Kinderstube für Fische" OR "Fischbestand" "anthropogen beeinflusst"	NA	0	27-06-2017
	"anthropogen überformt"	0	2016-05-23	allintitle:"0 Gruppe" OR "Alter 0" OR "CPUE" OR "Einheitsfang" OR "Fischbrut" OR "Fischlaich" OR "Fischlarve" OR "Fortpflanzung" OR "Jungfisch" OR "juvenile Fische" OR "Jährlinge" OR "Kinderstube für Fische" OR "Fischbestand"	allintitle:"0 Gruppe" OR "Alter 0" OR "CPUE" OR "Einheitsfang" OR "Fischbrut" OR "Fischlaich" OR "Fischlarve" OR "Fortpflanzung" OR "Jungfisch" OR "juvenile Fische" OR "Jährlinge" OR "Kinderstube für Fische" OR "Fischbestand" "anthropogen überformt"	NA	0	27-06-2017
	"Wasserbauliche Massnahme"	0	2016-05-23	allintitle:"0 Gruppe" OR "Alter 0" OR "CPUE" OR "Einheitsfang" OR "Fischbrut" OR "Fischlaich" OR "Fischlarve" OR "Fortpflanzung" OR "Jungfisch" OR "juvenile Fische" OR "Jährlinge" OR "Kinderstube für Fische" OR "Fischbestand"	allintitle:"0 Gruppe" OR "Alter 0" OR "CPUE" OR "Einheitsfang" OR "Fischbrut" OR "Fischlaich" OR "Fischlarve" OR "Fortpflanzung" OR "Jungfisch" OR "juvenile Fische" OR "Jährlinge" OR "Kinderstube für Fische" OR "Fischbestand" "Wasserbauliche Massnahme"	NA	0	27-06-2017
	NA				NA	NA	104

[truncated: 2 more sheets: GS_Swedish, GS_Spanish]
